# Supplementary material for: Local halide heterogeneity drives surface wrinkling in mixed-halide wide-bandgap perovskites
Source: Research Square preprint supplement (doi:10.21203/rs.3.rs-4814295/v1), 2024-09-02
Supplement: Supplementary file 1 [file 7f9b23c8670d423bd358160c.xlsx]

## Sheet: Fig 1a
		MA content
		0	25	50	75	100
Br content	0		1.5539	1.5696	1.5897	1.6188
	20		1.6757	1.6802	1.7127	1.7416
	40		1.8235	1.8398	1.8507	1.8675
	60	1.9436	1.9872	2.0065	2.013	2.0328
	80	2.0875	2.1233	2.1453	2.1603	2.1986
	100	2.2963	2.3221	2.3308

## Sheet: Fig 1j
Distance (um)	Roughness (um)	Roughness (um)	Roughness (um)	Roughness (um)
0	0.0884122	0.190652	0.185817	0.189035
0.0683594	0.0700052	0.177901	0.182938	0.203148
0.136719	0.0755114	0.1795	0.181758	0.186384
0.205078	0.0781054	0.168862	0.181057	0.170916
0.273438	0.092532	0.176056	0.19001	0.165425
0.341797	0.114822	0.186244	0.193047	0.161881
0.410156	0.146116	0.186309	0.193411	0.155003
0.478516	0.15933	0.187825	0.194087	0.158992
0.546875	0.179829	0.186347	0.195103	0.159821
0.615234	0.193603	0.18146	0.196193	0.147182
0.683594	0.211842	0.172273	0.196795	0.132771
0.751953	0.195953	0.164879	0.197067	0.118359
0.820312	0.177151	0.159514	0.1971	0.104351
0.888672	0.165073	0.156088	0.196738	0.107845
0.957031	0.165233	0.176244	0.195715	0.129914
1.02539	0.171474	0.19211	0.193644	0.129925
1.09375	0.176741	0.191357	0.190839	0.120539
1.16211	0.170093	0.188096	0.186416	0.115047
1.23047	0.169601	0.18467	0.180864	0.12454
1.29883	0.189778	0.180426	0.174659	0.134528
1.36719	0.192776	0.174575	0.167728	0.133814
1.43555	0.198604	0.166684	0.160623	0.152318
1.50391	0.191874	0.156055	0.15361	0.161976
1.57227	0.189608	0.142009	0.14724	0.173085
1.64062	0.231512	0.124398	0.141844	0.246389
1.70898	0.247399	0.114643	0.136934	0.297718
1.77734	0.241238	0.113164	0.13332	0.277794
1.8457	0.245936	0.098144	0.13068	0.259974
1.91406	0.246344	0.0808549	0.128931	0.243532
1.98242	0.228828	0.0670568	0.127751	0.227742
2.05078	0.215372	0.0934602	0.126737	0.212678
2.11914	0.205068	0.116538	0.126283	0.19834
2.1875	0.192587	0.111091	0.126233	0.212141
2.25586	0.179857	0.111633	0.137135	0.201046
2.32422	0.166328	0.124339	0.166519	0.185908
2.39258	0.152221	0.146773	0.171339	0.17416
2.46094	0.140943	0.163531	0.173154	0.170938
2.5293	0.126918	0.173554	0.173022	0.165842
2.59766	0.118405	0.169475	0.17209	0.147958
2.66602	0.103572	0.162494	0.170828	0.129403
2.73438	0.111512	0.164653	0.169162	0.141091
2.80273	0.10875	0.187171	0.16733	0.149618
2.87109	0.0884876	0.199628	0.165094	0.15053
2.93945	0.0691895	0.195963	0.163427	0.167399
3.00781	0.0558077	0.19262	0.162569	0.162634
3.07617	0.0693431	0.189598	0.160985	0.150252
3.14453	0.0836135	0.186576	0.158428	0.140296
3.21289	0.0846642	0.188092	0.154648	0.133904
3.28125	0.10136	0.187018	0.150795	0.125409
3.34961	0.108005	0.182213	0.147181	0.125264
3.41797	0.0953584	0.176031	0.144302	0.139626
3.48633	0.0921923	0.201139	0.141901	0.134125
3.55469	0.0914606	0.201039	0.141778	0.126199
3.62305	0.103949	0.189666	0.158916	0.117704
3.69141	0.116024	0.184944	0.176533	0.109126
3.75977	0.123156	0.191651	0.175923	0.0991696
3.82812	0.116177	0.190081	0.17523	0.109397
3.89648	0.107499	0.201656	0.174207	0.142086
3.96484	0.127851	0.200499	0.173514	0.165762
4.0332	0.154441	0.186371	0.172417	0.165857
4.10156	0.178183	0.174594	0.171238	0.157692
4.16992	0.212545	0.17328	0.169654	0.145632
4.23828	0.209471	0.18809	0.167344	0.13032
4.30664	0.218789	0.187337	0.1643	0.113152
4.375	0.221622	0.20369	0.160282	0.100844
4.44336	0.214974	0.223451	0.155372	0.131099
4.51172	0.20727	0.228615	0.149893	0.164339
4.58008	0.200778	0.226567	0.143845	0.188034
4.64844	0.209454	0.233273	0.155958	0.222579
4.7168	0.225424	0.233007	0.157131	0.227707
4.78516	0.231261	0.227477	0.152864	0.21369
4.85352	0.231172	0.218374	0.148855	0.243623
4.92188	0.226959	0.209684	0.149458	0.280281
4.99023	0.214468	0.202041	0.149325	0.264078
5.05859	0.198744	0.195041	0.146364	0.243263
5.12695	0.180419	0.18862	0.143641	0.22107
5.19531	0.159752	0.181629	0.141248	0.199355
5.26367	0.138589	0.173986	0.139499	0.206266
5.33203	0.135506	0.165204	0.138237	0.206516
5.40039	0.129345	0.156119	0.137544	0.198103
5.46875	0.121641	0.166298	0.138147	0.216598
5.53711	0.112237	0.16911	0.140532	0.208351
5.60547	0.165257	0.155486	0.157101	0.193452
5.67383	0.195154	0.146061	0.18396	0.180171
5.74219	0.169545	0.1419	0.186593	0.168993
5.81055	0.147086	0.162387	0.187113	0.158559
5.87891	0.177231	0.218133	0.187063	0.148529
5.94727	0.236572	0.203517	0.187344	0.138169
6.01562	0.275647	0.183637	0.18746	0.126504
6.08398	0.247759	0.16441	0.187089	0.113305
6.15234	0.274744	0.147286	0.186479	0.098002
6.2207	0.352247	0.132422	0.185051	0.0838291
6.28906	0.326224	0.120976	0.18298	0.0908134
6.35742	0.297684	0.11179	0.179853	0.110779
6.42578	0.271331	0.105121	0.213694	0.123927
6.49414	0.249525	0.103155	0.217135	0.132859
6.5625	0.232009	0.106702	0.215469	0.130115
6.63086	0.217341	0.10481	0.221014	0.127453
6.69922	0.204767	0.125462	0.219669	0.13655
6.76758	0.192929	0.122119	0.217194	0.127081
6.83594	0.185068	0.117314	0.21188	0.144198
6.9043	0.189445	0.112749	0.222294	0.15946
6.97266	0.192847	0.106897	0.224918	0.199021
7.04102	0.181734	0.0994934	0.216444	0.232518
7.10938	0.167719	0.101579	0.207483	0.210729
7.17773	0.176054	0.137555	0.198844	0.189345
7.24609	0.195671	0.219888	0.191096	0.168925
7.31445	0.208968	0.231859	0.184156	0.149901
7.38281	0.202476	0.296699	0.178521	0.142618
7.45117	0.199319	0.284757	0.174255	0.138661
7.51953	0.190559	0.275166	0.170971	0.135035
7.58789	0.192096	0.265907	0.168901	0.129773
7.65625	0.197446	0.256481	0.167712	0.153707
7.72461	0.196145	0.246	0.167019	0.165955
7.79297	0.213089	0.233332	0.166575	0.175696
7.86133	0.198412	0.218229	0.166277	0.170765
7.92969	0.209274	0.20094	0.166319	0.169325
7.99805	0.193788	0.181869	0.166031	0.163907
8.06641	0.176438	0.176091	0.165329	0.162467
8.13477	0.157397	0.170726	0.164002	0.163048
8.20312	0.148801	0.160088	0.162171	0.152045
8.27148	0.142879	0.144177	0.160017	0.139415
8.33984	0.145069	0.130701	0.156651	0.125242
8.4082	0.167515	0.11998	0.152146	0.122259
8.47656	0.159738	0.118419	0.147393	0.121379
8.54492	0.151868	0.141414	0.163154	0.115318
8.61328	0.161921	0.16417	0.164721	0.103984
8.68164	0.178691	0.16779	0.162825	0.109995
8.75	0.178446	0.160074	0.161719	0.154847
8.81836	0.16929	0.152844	0.156736	0.142622
8.88672	0.168797	0.149418	0.150035	0.126501
8.95508	0.164097	0.148582	0.142939	0.116462
9.02344	0.203649	0.16477	0.135999	0.136832
9.0918	0.242963	0.200084	0.129794	0.131818
9.16016	0.25682	0.205092	0.124802	0.121614
9.22852	0.262253	0.206204	0.120949	0.163214
9.29688	0.251875	0.205699	0.121065	0.195168
9.36523	0.248544	0.211028	0.14526	0.182943
9.43359	0.266296	0.204928	0.151613	0.173226
9.50195	0.269055	0.196394	0.168669	0.175515
9.57031	0.260055	0.18583	0.173002	0.215655
9.63867	0.251056	0.173649	0.171492	0.202134
9.70703	0.239778	0.159933	0.170073	0.186262
9.77539	0.21708	0.144187	0.169132	0.20743
9.84375	0.21351	0.127137	0.170057	0.230877
9.91211	0.219586	0.109857	0.172689	0.214757
9.98047	0.213507	0.093046	0.174836	0.198728
10.0488	0.218775	0.0878376	0.180702	0.182121
10.1172	0.210345	0.107599	0.200845	0.166083
10.1855	0.196797	0.103364	0.203717	0.151194
10.2539	0.180338	0.118174	0.202942	0.135964
10.3223	0.162271	0.167434	0.201597	0.120983
10.3906	0.147107	0.191485	0.200096	0.133976
10.459	0.134139	0.205413	0.198181	0.151662
10.5273	0.123026	0.211229	0.196193	0.148596
10.5957	0.112648	0.204229	0.192983	0.144878
10.6641	0.102353	0.189135	0.188726	0.154866
10.7324	0.0922141	0.17452	0.183651	0.146941
10.8008	0.11783	0.161861	0.178742	0.13252
10.8691	0.130879	0.152436	0.172776	0.117869
10.9375	0.135907	0.14268	0.167628	0.1302
11.0059	0.132824	0.133503	0.190031	0.163045
11.0742	0.126984	0.124316	0.188208	0.157388
11.1426	0.128439	0.115543	0.19367	0.141195
11.2109	0.123169	0.1079	0.193547	0.13043
11.2793	0.130788	0.101231	0.203796	0.129146
11.3477	0.121623	0.0943967	0.19783	0.160283
11.416	0.105164	0.094783	0.191138	0.14215
11.4844	0.105489	0.0978427	0.185742	0.125947
11.5527	0.100384	0.0957945	0.180915	0.111131
11.6211	0.0899974	0.101528	0.175354	0.099953
11.6895	0.0676217	0.110421	0.170362	0.105973
11.7578	0.0845655	0.116889	0.165939	0.141335
11.8262	0.0978621	0.108355	0.162086	0.127566
11.8945	0.112289	0.0979557	0.158885	0.127008
11.9629	0.123068	0.0851222	0.156245	0.140975
12.0312	0.120389	0.0727848	0.154009	0.179644
12.0996	0.136037	0.072032	0.152343	0.207951
12.168	0.136757	0.0782519	0.150842	0.21454
12.2363	0.170632	0.0691483	0.149331	0.251676
12.3047	0.182303	0.0568017	0.147913	0.263612
12.373	0.191548	0.0441336	0.146972	0.245305
12.4414	0.189356	0.0446026	0.152196	0.228624
12.5098	0.180034	0.0738446	0.166165	0.212421
12.5781	0.165449	0.0814426	0.182248	0.1972
12.6465	0.153206	0.0857976	0.180829	0.187327
12.7148	0.142581	0.0782373	0.178428	0.172098
12.7832	0.141849	0.0694644	0.174896	0.154608
12.8516	0.141687	0.0954635	0.170391	0.13801
12.9199	0.133661	0.10703	0.165325	0.145242
12.9883	0.13236	0.120306	0.168353	0.142011
13.0566	0.146704	0.150926	0.189792	0.128408
13.125	0.149215	0.167683	0.201988	0.112774
13.1934	0.136081	0.155502	0.20316	0.0966628
13.2617	0.134137	0.14908	0.199464	0.0981351
13.3301	0.144025	0.145085	0.193911	0.110549
13.3984	0.156826	0.205938	0.187541	0.107078
13.4668	0.152364	0.202512	0.181171	0.103608
13.5352	0.147581	0.186757	0.175857	0.116922
13.6035	0.130635	0.172638	0.170782	0.127397
13.6719	0.120579	0.163378	0.166764	0.115007
13.7402	0.115961	0.160439	0.16372	0.135367
13.8086	0.14449	0.152309	0.161245	0.134984
13.877	0.216389	0.144592	0.159496	0.137668
13.9453	0.204385	0.149508	0.157829	0.148952
14.0137	0.180879	0.154919	0.156649	0.166474
14.082	0.217924	0.157253	0.155635	0.167459
14.1504	0.251808	0.15277	0.155025	0.176391
14.2188	0.222864	0.14951	0.159101	0.194326
14.2871	0.204374	0.146809	0.164085	0.198958
14.3555	0.228291	0.139166	0.177816	0.204895
14.4238	0.209801	0.135253	0.193981	0.199716
14.4922	0.189621	0.134096	0.213885	0.184579
14.5605	0.191315	0.148345	0.235801	0.16935
14.6289	0.188562	0.162916	0.24176	0.15988
14.6973	0.188317	0.1526	0.252413	0.151146
14.7656	0.226822	0.152168	0.252041	0.136413
14.834	0.22243	0.155715	0.250623	0.121027
14.9023	0.217505	0.185517	0.248139	0.114718
14.9707	0.212035	0.204948	0.245094	0.124293
15.0391	0.205621	0.236707	0.241398	0.12334
15.1074	0.19794	0.254116	0.237223	0.13049
15.1758	0.188949	0.250121	0.232801	0.139909
15.2441	0.178575	0.242074	0.226752	0.197797
15.3125	0.166655	0.230058	0.219895	0.262098
15.3809	0.15298	0.214468	0.212312	0.315778
15.4492	0.137507	0.197988	0.204243	0.389725
15.5176	0.120517	0.181672	0.195769	0.386099
15.5859	0.102798	0.166092	0.187616	0.364705
15.6543	0.0855608	0.151807	0.180272	0.347216
15.7227	0.0700077	0.138413	0.173167	0.388494
15.791	0.0564931	0.125745	0.167771	0.36959
15.8594	0.0447478	0.113637	0.177459	0.34017
15.9277	0.0337875	0.10186	0.181875	0.317216
15.9961	0.0214471	0.0907355	0.181742	0.298337
16.0645	0.0367648	0.080658	0.179102	0.280558
16.1328	0.0445494	0.0869607	0.176379	0.263087
16.2012	0.129264	0.0999972	0.17407	0.245983
16.2695	0.153089	0.120319	0.17232	0.229705
16.3379	0.159413	0.143479	0.170654	0.214749
16.4062	0.172296	0.169552	0.169144	0.200284
16.4746	0.148064	0.191261	0.16756	0.186852
16.543	0.129896	0.182561	0.165976	0.175319
16.6113	0.119114	0.171758	0.163905	0.164858
16.6797	0.120009	0.161129	0.161669	0.154968
16.748	0.133948	0.149839	0.158864	0.145729
16.8164	0.143837	0.138228	0.155093	0.137205
16.8848	0.164749	0.134875	0.150432	0.129991
16.9531	0.190512	0.133396	0.145201	0.122487
17.0215	0.207621	0.123245	0.139235	0.119889
17.0898	0.218153	0.112846	0.132865	0.116585
17.1582	0.216043	0.106903	0.126256	0.113923
17.2266	0.208826	0.102181	0.120373	0.119373
17.2949	0.199909	0.0929217	0.143832	0.14914
17.3633	0.189127	0.105701	0.143544	0.14737
17.4316	0.177931	0.11509	0.137578	0.134171
17.5	0.170236	0.134117	0.13243	0.124619
17.5684	0.169091	0.141797	0.127842	0.128443
17.6367	0.17185	0.151012	0.123584	0.13065
17.7051	0.174444	0.152859	0.120053	0.15045
17.7734	0.165197	0.144408	0.117082	0.146006
17.8418	0.150611	0.137252	0.114773	0.12972
17.9102	0.133582	0.144602	0.113023	0.158017
17.9785	0.150361	0.147909	0.111678	0.173196
18.0469	0.159689	0.16248	0.110251	0.153769
18.1152	0.168107	0.187175	0.109154	0.133349
18.1836	0.142167	0.187552	0.107653	0.112451
18.252	0.117035	0.177401	0.105738	0.112545
18.3203	0.131748	0.183869	0.103833	0.149286
18.3887	0.129277	0.212459	0.111647	0.126845
18.457	0.122264	0.228325	0.158854	0.109594
18.5254	0.122225	0.219147	0.185888	0.0929868
18.5938	0.133869	0.202584	0.185268	0.0893604
18.6621	0.144646	0.186995	0.183115	0.0847509
18.7305	0.15576	0.180656	0.180236	0.0866274
18.7988	0.170347	0.201786	0.176704	0.127906
18.8672	0.167024	0.213041	0.172603	0.151436
18.9355	0.162226	0.219582	0.168098	0.132963
19.0039	0.159454	0.21453	0.163924	0.117743
19.0723	0.159034	0.201944	0.159336	0.104948
19.1406	0.158403	0.190902	0.15507	0.0937796
19.209	0.156269	0.181146	0.15073	0.0834927
19.2773	0.152044	0.172539	0.145425	0.0741061
19.3457	0.14499	0.163931	0.139625	0.0743657
19.4141	0.135896	0.155636	0.133898	0.0849237
19.4824	0.125382	0.147185	0.128501	0.0940944
19.5508	0.114055	0.13776	0.125135	0.105626
19.6191	0.102931	0.127122	0.136441	0.119096
19.6875	0.0929989	0.134233	0.142555	0.119999
19.7559	0.116181	0.164044	0.141054	0.129831
19.8242	0.134015	0.195794	0.13857	0.147518
19.8926	0.148525	0.236704	0.13853	0.13634
19.9609	0.157357	0.23279	0.139619	0.123711
20.0293	0.159702	0.298761	0.137383	0.109382
20.0977	0.155002	0.315767	0.134826	0.103229
20.166	0.166581	0.304963	0.132424	0.107549
20.2344	0.154513	0.295051	0.130758	0.0872117
20.3027	0.158972	0.285139	0.129743	0.0751518
20.3711	0.136183	0.274088	0.12929	0.0784889
20.4395	0.110564	0.261907	0.127706	0.0892857
20.5078	0.0931399	0.246731	0.124496	0.11062
20.5762	0.0986461	0.228302	0.120643	0.117283
20.6445	0.0815436	0.208175	0.116055	0.127675
20.7129	0.073187	0.187725	0.11098	0.16165
20.7812	0.0645915	0.166881	0.10518	0.201551
20.8496	0.0750494	0.147727	0.0992139	0.174324
20.918	0.0679972	0.155408	0.093496	0.153757
20.9863	0.0733381	0.189261	0.0883385	0.140723
21.0547	0.0688031	0.279788	0.0848898	0.239226
21.123	0.0787649	0.321359	0.0820934	0.226679
21.1914	0.107054	0.296445	0.0950982	0.19767
21.2598	0.125376	0.271209	0.10113	0.17409
21.3281	0.147428	0.247765	0.09849	0.221615
21.3965	0.1488	0.227803	0.110117	0.273266
21.4648	0.140535	0.211644	0.122635	0.242557
21.5332	0.143203	0.201245	0.128593	0.217121
21.6016	0.149609	0.195632	0.127083	0.198244
21.6699	0.146204	0.189532	0.125334	0.185128
21.7383	0.140852	0.18448	0.124154	0.199333
21.8066	0.130226	0.179437	0.124114	0.205426
21.875	0.115953	0.176167	0.123899	0.25489
21.9434	0.103389	0.176801	0.123693	0.24713
22.0117	0.0960059	0.177509	0.122679	0.234656
22.0801	0.101439	0.234799	0.121168	0.225022
22.1484	0.0973813	0.282929	0.118611	0.217665
22.2168	0.091055	0.271639	0.114997	0.219459
22.2852	0.106373	0.262379	0.110657	0.222236
22.3535	0.118778	0.252954	0.10583	0.271378
22.4219	0.116099	0.243041	0.100673	0.317434
22.4902	0.101991	0.231182	0.0955245	0.304483
22.5586	0.128416	0.216814	0.0902109	0.295014
22.627	0.157762	0.199929	0.0863487	0.286757
22.6953	0.158812	0.180206	0.0929504	0.277453
22.7637	0.178016	0.158222	0.0941226	0.26668
22.832	0.159949	0.136312	0.0887263	0.253646
22.9004	0.167715	0.130782	0.092085	0.236074
22.9688	0.253973	0.134816	0.115223	0.213063
23.0371	0.257376	0.137388	0.11939	0.185193
23.1055	0.231757	0.132336	0.137429	0.154723
23.1738	0.205321	0.121129	0.136488	0.127431
23.2422	0.190405	0.109517	0.132305	0.106046
23.3105	0.210187	0.0996785	0.139724	0.0917082
23.3789	0.287847	0.0926051	0.141374	0.082239
23.4473	0.259389	0.0882051	0.139147	0.0760954
23.5156	0.233605	0.0972638	0.135937	0.0722209
23.584	0.252166	0.113865	0.132489	0.069559
23.6523	0.281108	0.138973	0.129279	0.0935665
23.7207	0.272595	0.151274	0.126473	0.0985297
23.7891	0.259783	0.171513	0.124237	0.114921
23.8574	0.249726	0.170356	0.122488	0.11429
23.9258	0.239266	0.165074	0.121878	0.117388
23.9941	0.251185	0.1597	0.125889	0.148938
24.0625	0.345545	0.154088	0.131195	0.157126
24.1309	0.323243	0.147979	0.130006	0.153582
24.1992	0.296733	0.140823	0.127853	0.149551
24.2676	0.273632	0.132215	0.125213	0.155314
24.3359	0.253525	0.121486	0.122416	0.190262
24.4043	0.234953	0.125198	0.11815	0.211762
24.4727	0.217364	0.149249	0.113167	0.214052
24.541	0.200013	0.180834	0.114817	0.211307
24.6094	0.18201	0.187385	0.138037	0.20532
24.6777	0.163126	0.199034	0.14982	0.196181
24.7461	0.142211	0.200715	0.159904	0.196275
24.8145	0.119679	0.196233	0.176078	0.220853
24.8828	0.0967335	0.182187	0.173034	0.206762
24.9512	0.0850604	0.167736	0.167306	0.186673
25.0195	0.0651927	0.172257	0.167753	0.16042
25.0879	0.0551365	0.178394	0.161704	0.13062
25.1562	0.0544049	0.180645	0.153717	0.102823
25.2246	0.0782387	0.19935	0.14483	0.135429
25.293	0.0988297	0.189677	0.143733	0.186914
25.3613	0.098585	0.178708	0.155038	0.200789
25.4297	0.111551	0.183146	0.154419	0.195371
25.498	0.119335	0.190018	0.148545	0.20998
25.5664	0.194873	0.185379	0.142818	0.201081
25.6348	0.179304	0.168494	0.138946	0.197445
25.7031	0.154347	0.152262	0.136735	0.19787
25.7715	0.132614	0.14754	0.140524	0.184671
25.8398	0.115108	0.139897	0.146473	0.171876
25.9082	0.120862	0.143205	0.14745	0.159651
25.9766	0.116483	0.132806	0.147035	0.149869
26.0449	0.115421	0.124593	0.146682	0.142669
26.1133	0.116554	0.116794	0.146751	0.168211
26.1816	0.137715	0.108903	0.146658	0.213079
26.25	0.157975	0.14634	0.146226	0.256548
26.3184	0.172153	0.178568	0.145489	0.270648
26.3867	0.157651	0.170925	0.144275	0.269355
26.4551	0.145408	0.167756	0.142528	0.269269
26.5234	0.184713	0.175345	0.140166	0.276913
26.5918	0.185763	0.173618	0.136931	0.270748
26.6602	0.168817	0.164119	0.133332	0.261588
26.7285	0.151476	0.153564	0.129646	0.252985
26.7969	0.132591	0.142513	0.151158	0.244715
26.8652	0.112484	0.144599	0.157429	0.23594
26.9336	0.0988544	0.153905	0.155606	0.225782
27.002	0.0942368	0.143911	0.171854	0.213909
27.0703	0.0763166	0.130673	0.18405	0.202081
27.1387	0.0606657	0.14257	0.183431	0.188908
27.207	0.0729885	0.142387	0.179413	0.174443
27.2754	0.110033	0.164335	0.171187	0.166441
27.3438	0.123816	0.201918	0.161896	0.170026
27.4121	0.140108	0.18665	0.151878	0.143056
27.4805	0.150887	0.181442	0.141622	0.11875
27.5488	0.161088	0.184502	0.131853	0.102225
27.6172	0.169516	0.200046	0.123462	0.097138
27.6855	0.173249	0.251906	0.116439	0.115064
27.7539	0.175025	0.253992	0.111126	0.102195
27.8223	0.168543	0.232082	0.107594	0.101555
27.8906	0.15946	0.209446	0.105762	0.100602
27.959	0.148688	0.187619	0.1315	0.0941272
28.0273	0.158971	0.168465	0.169787	0.0877448
28.0957	0.230062	0.15791	0.178658	0.0976505
28.1641	0.215302	0.148567	0.175292	0.134225
28.2324	0.233789	0.136707	0.172082	0.132051
28.3008	0.289235	0.125739	0.17025	0.124198
28.3691	0.263781	0.115753	0.169475	0.115703
28.4375	0.239945	0.112649	0.168295	0.130477
28.5059	0.217321	0.131519	0.166877	0.148973
28.5742	0.19535	0.129792	0.184098	0.157326
28.6426	0.201508	0.122149	0.200263	0.152643
28.7109	0.27236	0.123987	0.199157	0.142209
28.7793	0.248606	0.140349	0.197335	0.139795
28.8477	0.225174	0.152972	0.201502	0.148645
28.916	0.202394	0.152706	0.233238	0.135445
28.9844	0.180588	0.147654	0.239509	0.140409
29.0527	0.159425	0.139533	0.25471	0.137012
29.1211	0.150591	0.129695	0.258307	0.19807
29.1895	0.1642	0.140132	0.25518	0.25864
29.2578	0.17531	0.154868	0.251245	0.241877
29.3262	0.181064	0.15744	0.246583	0.223166
29.3945	0.197107	0.17711	0.240617	0.20202
29.4629	0.209026	0.168254	0.233273	0.178201
29.5312	0.272657	0.152022	0.224551	0.153813
29.5996	0.286928	0.140245	0.214617	0.130894
29.668	0.262439	0.136736	0.203139	0.110805
29.7363	0.239255	0.148063	0.191174	0.0938022
29.8047	0.216796	0.140834	0.178649	0.0797855
29.873	0.195146	0.15297	0.166932	0.0841056
29.9414	0.173423	0.16405	0.157806	0.0877643
30.0098	0.15203	0.174725	0.149323	0.14534
30.0781	0.13095	0.188157	0.14174	0.175907
30.1465	0.110274	0.167882	0.135287	0.256579
30.2148	0.0903325	0.155214	0.130552	0.24371
30.2832	0.0800283	0.179661	0.127912	0.222078
30.3516	0.106379	0.175178	0.127789	0.203128
30.4199	0.108725	0.165606	0.142888	0.186686
30.4883	0.10329	0.184384	0.165622	0.171943
30.5566	0.113583	0.184274	0.176284	0.157449
30.625	0.131335	0.179066	0.172826	0.142477
30.6934	0.22147	0.187068	0.184618	0.126604
30.7617	0.207362	0.187537	0.187977	0.109271
30.8301	0.182717	0.201217	0.184767	0.0911295
30.8984	0.158964	0.24773	0.182209	0.0737964
30.9668	0.15419	0.286296	0.180387	0.0597062
31.0352	0.159283	0.267299	0.179363	0.062878
31.1035	0.178009	0.250414	0.187343	0.0581124
31.1719	0.186353	0.234668	0.199944	0.0750735
31.2402	0.237261	0.219896	0.196091	0.117399
31.3086	0.260847	0.205363	0.196289	0.144328
31.377	0.255255	0.19083	0.225996	0.192818
31.4453	0.22858	0.175893	0.259423	0.242365
31.5137	0.203531	0.162012	0.253383	0.340547
31.582	0.18156	0.153478	0.249117	0.320219
31.6504	0.162666	0.139028	0.243482	0.296969
31.7188	0.145894	0.124743	0.237112	0.273233
31.7871	0.129839	0.116043	0.229529	0.249331
31.8555	0.113306	0.106783	0.220972	0.255186
31.9238	0.0954684	0.138212	0.211681	0.280084
31.9922	0.116216	0.164698	0.202389	0.309365
32.0605	0.152617	0.164349	0.196589	0.293814
32.1289	0.133723	0.150064	0.190632	0.288323
32.1973	0.125532	0.142743	0.182553	0.266929
32.2656	0.187537	0.149863	0.179187	0.253313
32.334	0.18551	0.164911	0.177603	0.242344
32.4023	0.165642	0.155082	0.191582	0.228838
32.4707	0.157212	0.150765	0.199314	0.214853
32.5391	0.156076	0.152364	0.204133	0.200433
32.6074	0.144412	0.154698	0.198902	0.184922
32.6758	0.166289	0.145355	0.193744	0.167992
32.7441	0.170335	0.133652	0.189322	0.149313
32.8125	0.156062	0.121066	0.185221	0.128949
32.8809	0.226105	0.107994	0.181203	0.107792
32.9492	0.220266	0.0946	0.176707	0.0883191
33.0176	0.193591	0.0934429	0.172036	0.0771175
33.0859	0.165703	0.0926074	0.16664	0.0725877
33.1543	0.139524	0.0920199	0.160591	0.0858302
33.2227	0.187914	0.0981572	0.153743	0.102444
33.291	0.19602	0.101217	0.146069	0.122379
33.3594	0.256491	0.104442	0.137512	0.156047
33.4277	0.225764	0.124359	0.128156	0.138723
33.4961	0.195929	0.129201	0.118709	0.16613
33.5645	0.169585	0.11759	0.133165	0.177579
33.6328	0.151995	0.113915	0.152325	0.250635
33.7012	0.157988	0.123222	0.177172	0.222029
33.7695	0.157009	0.149056	0.187668	0.196428
33.8379	0.179382	0.167191	0.199938	0.175613
33.9062	0.206054	0.17365	0.215139	0.159575
33.9746	0.194942	0.170628	0.222062	0.146955
34.043	0.177022	0.169719	0.22396	0.136273
34.1113	0.161536	0.164437	0.22708	0.126639
34.1797	0.149146	0.156867	0.223548	0.117252
34.248	0.158777	0.147442	0.2132	0.106478
34.3164	0.164697	0.162582	0.203596	0.0938487
34.3848	0.177093	0.1782	0.194388	0.0782243
34.4531	0.171741	0.181747	0.186153	0.0592651
34.5215	0.15699	0.178394	0.18003	0.0375591
34.5898	0.158767	0.176916	0.194083	0.033115
34.6582	0.184704	0.181032	0.195824	0.0182898
34.7266	0.17271	0.227784	0.191558	0.0359033

## Sheet: Fig 1k
Distance (um)	Roughness (um)	Roughness (um)	Roughness (um)	Roughness (um)
0	0.173918	0.171066	0.273772	0.241471
0.0683594	0.158387	0.164897	0.251338	0.283219
0.136719	0.204546	0.193209	0.230519	0.286677
0.205078	0.215179	0.186228	0.209531	0.242019
0.273438	0.258115	0.197336	0.187506	0.24968
0.341797	0.2417	0.216366	0.163698	0.262756
0.410156	0.250068	0.248221	0.18697	0.26824
0.478516	0.286463	0.236074	0.228652	0.287528
0.546875	0.275536	0.220061	0.203959	0.242789
0.615234	0.237313	0.247963	0.177162	0.272331
0.683594	0.277509	0.265129	0.151899	0.27685
0.751953	0.239367	0.237963	0.200853	0.231942
0.820312	0.271238	0.279678	0.206841	0.248491
0.888672	0.251995	0.254939	0.175688	0.254054
0.957031	0.28201	0.215342	0.162784	0.28853
1.02539	0.263819	0.263268	0.21545	0.261148
1.09375	0.292219	0.247328	0.273042	0.320574
1.16211	0.268693	0.298974	0.243496	0.27324
1.23047	0.317118	0.309849	0.271694	0.264355
1.29883	0.270738	0.260633	0.331054	0.345019
1.36719	0.295828	0.310665	0.300632	0.304877
1.43555	0.288542	0.339467	0.268346	0.258756
1.50391	0.336074	0.293883	0.302354	0.261009
1.57227	0.348893	0.354899	0.287915	0.283616
1.64062	0.336834	0.319577	0.255075	0.26762
1.70898	0.315333	0.270531	0.22569	0.27827
1.77734	0.268471	0.25136	0.200837	0.281737
1.8457	0.239288	0.218794	0.180339	0.276637
1.91406	0.245968	0.191789	0.162268	0.254591
1.98242	0.224306	0.237698	0.174154	0.235686
2.05078	0.186734	0.199234	0.174734	0.19192
2.11914	0.222639	0.187006	0.189279	0.150724
2.1875	0.206546	0.257786	0.219414	0.110742
2.25586	0.216777	0.250886	0.258516	0.0696356
2.32422	0.267942	0.210405	0.32256	0.0627602
2.39258	0.240302	0.174359	0.295932	0.0806022
2.46094	0.283889	0.244568	0.273176	0.132595
2.5293	0.278129	0.229761	0.252437	0.15149
2.59766	0.264616	0.184113	0.23259	0.181442
2.66602	0.275329	0.208383	0.266598	0.25006
2.73438	0.320041	0.247189	0.330401	0.244326
2.80273	0.302092	0.197821	0.308289	0.274029
2.87109	0.255793	0.209177	0.286746	0.271115
2.93945	0.271031	0.257023	0.263918	0.267076
3.00781	0.32148	0.23672	0.238977	0.221276
3.07617	0.27502	0.240965	0.216302	0.214248
3.14453	0.236637	0.263949	0.194671	0.203018
3.21289	0.259789	0.26052	0.178296	0.232158
3.28125	0.244901	0.284235	0.16507	0.220686
3.34961	0.240516	0.260781	0.172753	0.17401
3.41797	0.193342	0.214	0.252066	0.177557
3.48633	0.159803	0.251344	0.218815	0.239964
3.55469	0.183518	0.220715	0.214469	0.193289
3.62305	0.213614	0.200331	0.228942	0.165497
3.69141	0.177657	0.162027	0.215227	0.193432
3.75977	0.15082	0.132274	0.289846	0.18785
3.82812	0.205713	0.107286	0.297939	0.233463
3.89648	0.200596	0.179608	0.264367	0.226025
3.96484	0.165041	0.234405	0.233295	0.204469
4.0332	0.22388	0.22928	0.206578	0.241757
4.10156	0.221511	0.267845	0.183983	0.24401
4.16992	0.28076	0.255706	0.165342	0.296252
4.23828	0.24383	0.311226	0.148404	0.296247
4.30664	0.20989	0.308126	0.132912	0.307942
4.375	0.2567	0.266986	0.124934	0.264738
4.44336	0.224053	0.226023	0.110166	0.23243
4.51172	0.275386	0.183108	0.100982	0.266014
4.58008	0.255734	0.137211	0.105756	0.24097
4.64844	0.274121	0.106413	0.124834	0.199951
4.7168	0.308258	0.13642	0.144795	0.155928
4.78516	0.25615	0.180722	0.209491	0.126448
4.85352	0.274618	0.165826	0.18471	0.141944
4.92188	0.270313	0.254131	0.156788	0.100516
4.99023	0.325599	0.218167	0.126037	0.136036
5.05859	0.314271	0.28071	0.153021	0.140957
5.12695	0.318605	0.288996	0.182754	0.162752
5.19531	0.334003	0.329586	0.250599	0.203279
5.26367	0.332768	0.300564	0.263859	0.22321
5.33203	0.379336	0.35778	0.298188	0.189697
5.40039	0.341764	0.31083	0.316052	0.202934
5.46875	0.328491	0.32937	0.2941	0.218502
5.53711	0.326131	0.300509	0.32004	0.18257
5.60547	0.350979	0.263411	0.306244	0.189267
5.67383	0.319618	0.264426	0.292046	0.233586
5.74219	0.266698	0.30009	0.271878	0.187232
5.81055	0.227671	0.254595	0.268584	0.216452
5.87891	0.234351	0.210964	0.280623	0.216038
5.94727	0.212922	0.219162	0.346853	0.266255
6.01562	0.285253	0.247144	0.310694	0.271176
6.08398	0.252036	0.211348	0.274937	0.296121
6.15234	0.211965	0.2017	0.261792	0.342867
6.2207	0.259095	0.223069	0.239197	0.291507
6.28906	0.304619	0.206325	0.215638	0.341081
6.35742	0.299663	0.222438	0.195702	0.314342
6.42578	0.285346	0.267536	0.177551	0.293742
6.49414	0.328764	0.241423	0.159802	0.284528
6.5625	0.355878	0.271591	0.14116	0.256744
6.63086	0.358194	0.235465	0.121635	0.226936
6.69922	0.388691	0.197724	0.142159	0.259233
6.76758	0.345952	0.18057	0.118833	0.267786
6.83594	0.327995	0.178524	0.0902673	0.229661
6.9043	0.306735	0.220801	0.0947201	0.225855
6.97266	0.369214	0.204057	0.110238	0.24749
7.04102	0.329215	0.174786	0.130689	0.25814
7.10938	0.274198	0.176532	0.126014	0.257492
7.17773	0.217075	0.232855	0.178278	0.249813
7.24609	0.227555	0.204653	0.155121	0.259411
7.31445	0.227686	0.157052	0.200354	0.219678
7.38281	0.277565	0.140871	0.216113	0.235977
7.45117	0.275767	0.195748	0.258043	0.237748
7.51953	0.23658	0.193942	0.225597	0.274891
7.58789	0.261749	0.277322	0.204207	0.286667
7.65625	0.218681	0.239492	0.277139	0.296353
7.72461	0.243609	0.209345	0.251724	0.244422
7.79297	0.207009	0.229099	0.277736	0.194596
7.86133	0.189623	0.25966	0.267821	0.19386
7.92969	0.178455	0.267144	0.30837	0.208384
7.99805	0.154045	0.273807	0.272532	0.234542
8.06641	0.166053	0.347745	0.240086	0.270304
8.13477	0.129123	0.297806	0.218543	0.290564
8.20312	0.109229	0.298499	0.196511	0.332473
8.27148	0.0998379	0.286521	0.178681	0.294428
8.33984	0.112006	0.350606	0.167553	0.292406
8.4082	0.0897736	0.307048	0.169667	0.278427
8.47656	0.0811938	0.260661	0.191485	0.271873
8.54492	0.106604	0.223651	0.177448	0.27227
8.61328	0.0984986	0.228459	0.158244	0.263948
8.68164	0.0518864	0.191361	0.136782	0.320385
8.75	0.0959475	0.195775	0.113858	0.307057
8.81836	0.076142	0.215601	0.0957869	0.266424
8.88672	0.116892	0.178752	0.119782	0.230806
8.95508	0.136011	0.172904	0.162757	0.194552
9.02344	0.142522	0.179488	0.228594	0.151903
9.0918	0.147587	0.190121	0.2026	0.102238
9.16016	0.182527	0.220691	0.196968	0.052083
9.22852	0.159411	0.193926	0.235178	0.0872818
9.29688	0.152197	0.159175	0.25215	0.078952
9.36523	0.20652	0.152998	0.251597	0.109876
9.43359	0.168297	0.134398	0.249276	0.15307
9.50195	0.159958	0.140981	0.275441	0.173821
9.57031	0.130855	0.141433	0.287567	0.236059
9.63867	0.127523	0.154887	0.359696	0.274336
9.70703	0.175465	0.17141	0.332657	0.284255
9.77539	0.12731	0.136088	0.302959	0.247592
9.84375	0.082546	0.171182	0.278829	0.295302
9.91211	0.107394	0.127463	0.309365	0.275995
9.98047	0.0944509	0.105624	0.3152	0.25104
10.0488	0.0723794	0.12304	0.336206	0.273318
10.1172	0.0697699	0.193827	0.317163	0.2188
10.1855	0.0928422	0.155435	0.302322	0.260379
10.2539	0.1298	0.155558	0.268188	0.212008
10.3223	0.0834207	0.213023	0.23792	0.186811
10.3906	0.111017	0.199911	0.211122	0.238716
10.459	0.169293	0.223538	0.187643	0.199393
10.5273	0.207544	0.22084	0.236589	0.193972
10.5957	0.278332	0.182448	0.223926	0.178627
10.6641	0.228971	0.233926	0.253498	0.173447
10.7324	0.221918	0.242535	0.249152	0.227618
10.8008	0.213017	0.201411	0.241093	0.2201
10.8691	0.194666	0.208967	0.34317	0.185132
10.9375	0.188344	0.250915	0.349166	0.168976
11.0059	0.186458	0.285936	0.406107	0.188104
11.0742	0.172382	0.242538	0.374223	0.201422
11.1426	0.190528	0.218361	0.345818	0.224181
11.2109	0.206328	0.254419	0.329033	0.215048
11.2793	0.197419	0.273361	0.323312	0.280533
11.3477	0.245353	0.258232	0.296443	0.263404
11.416	0.202542	0.29155	0.272393	0.230204
11.4844	0.27034	0.242664	0.329495	0.283089
11.5527	0.227681	0.229392	0.333385	0.30691
11.6211	0.231122	0.256891	0.306025	0.267731
11.6895	0.270909	0.30628	0.27697	0.267485
11.7578	0.27791	0.255289	0.245905	0.274986
11.8262	0.260121	0.213595	0.21992	0.240661
11.8945	0.267363	0.268873	0.24561	0.280866
11.9629	0.300207	0.294839	0.282117	0.283119
12.0312	0.248179	0.269529	0.272524	0.229332
12.0996	0.259615	0.278788	0.3256	0.175392
12.168	0.278493	0.303789	0.335058	0.172069
12.2363	0.274509	0.319179	0.372055	0.190963
12.3047	0.337149	0.322693	0.338484	0.218641
12.373	0.3221	0.296901	0.304334	0.171242
12.4414	0.266279	0.307446	0.28198	0.164206
12.5098	0.212885	0.316705	0.310668	0.227666
12.5781	0.200746	0.279848	0.277892	0.298157
12.6465	0.167529	0.277312	0.250379	0.2719
12.7148	0.156683	0.238277	0.225928	0.273028
12.7832	0.215128	0.199082	0.211489	0.236035
12.8516	0.170364	0.16707	0.287322	0.197275
12.9199	0.126411	0.203867	0.332153	0.169081
12.9883	0.138009	0.224907	0.346627	0.217514
13.0566	0.164472	0.284702	0.38241	0.225023
13.125	0.169536	0.267636	0.352069	0.187146
13.1934	0.148357	0.303694	0.388342	0.219115
13.2617	0.196219	0.337012	0.415488	0.248576
13.3301	0.16849	0.294988	0.38546	0.296535
13.3984	0.21579	0.249975	0.358831	0.260836
13.4668	0.168928	0.200133	0.333327	0.284328
13.5352	0.119399	0.156084	0.307341	0.276006
13.6035	0.0835226	0.122699	0.279981	0.33462
13.6719	0.132919	0.136482	0.256101	0.322096
13.7402	0.169957	0.158494	0.306814	0.280097
13.8086	0.235096	0.162739	0.331621	0.324505
13.877	0.231835	0.193389	0.355134	0.311578
13.9453	0.204685	0.26199	0.395128	0.266671
14.0137	0.239457	0.27407	0.366073	0.271993
14.082	0.24686	0.223738	0.335233	0.261004
14.1504	0.208243	0.238718	0.319179	0.273189
14.2188	0.21686	0.26719	0.378547	0.302096
14.2871	0.218694	0.218063	0.372755	0.249836
14.3555	0.2206	0.182902	0.338605	0.199528
14.4238	0.268382	0.213962	0.304623	0.196855
14.4922	0.319876	0.204723	0.272739	0.215171
14.5605	0.328332	0.202676	0.243692	0.22873
14.6289	0.358829	0.199729	0.217143	0.197564
14.6973	0.325941	0.23958	0.192773	0.208045
14.7656	0.303709	0.243913	0.169607	0.213368
14.834	0.311514	0.205771	0.146852	0.210293
14.9023	0.336121	0.201217	0.122883	0.267783
14.9707	0.307749	0.23316	0.124025	0.27157
15.0391	0.287944	0.255164	0.190263	0.308143
15.1074	0.265551	0.250771	0.209903	0.334704
15.1758	0.255669	0.216992	0.205476	0.287691
15.2441	0.211725	0.284621	0.225108	0.247878
15.3125	0.216789	0.274981	0.238207	0.278874
15.3809	0.207149	0.23135	0.22409	0.290987
15.4492	0.160858	0.213634	0.295889	0.249309
15.5176	0.124973	0.223777	0.28726	0.212879
15.5859	0.225155	0.234402	0.259908	0.234112
15.6543	0.29902	0.183901	0.231985	0.319059
15.7227	0.375633	0.166177	0.201556	0.288607
15.791	0.361637	0.153627	0.188571	0.361035
15.8594	0.416924	0.172899	0.183815	0.386864
15.9277	0.364896	0.194019	0.178264	0.401476
15.9961	0.323442	0.257293	0.222292	0.357372
16.0645	0.350227	0.212529	0.251775	0.311982
16.1328	0.391307	0.249712	0.230876	0.292354
16.2012	0.341135	0.209962	0.296616	0.283952
16.2695	0.332877	0.204516	0.261839	0.2623
16.3379	0.346097	0.202461	0.251916	0.250828
16.4062	0.342194	0.24498	0.258635	0.207302
16.4746	0.361626	0.19885	0.3419	0.223754
16.543	0.309277	0.159325	0.313809	0.25201
16.6113	0.259587	0.146374	0.284754	0.206307
16.6797	0.2485	0.177185	0.307062	0.164308
16.748	0.285216	0.15713	0.311836	0.129662
16.8164	0.270417	0.174618	0.277854	0.151859
16.8848	0.218309	0.253795	0.249289	0.148704
16.9531	0.170644	0.26168	0.22581	0.187937
17.0215	0.227706	0.287243	0.204831	0.205779
17.0898	0.308353	0.286643	0.1958	0.20706
17.1582	0.336343	0.358402	0.230137	0.21084
17.2266	0.340114	0.323321	0.21884	0.195262
17.2949	0.35818	0.281941	0.195441	0.153014
17.3633	0.304457	0.282152	0.213466	0.154785
17.4316	0.258238	0.252888	0.234794	0.154458
17.5	0.326615	0.245104	0.208888	0.135875
17.5684	0.29065	0.240221	0.196707	0.172609
17.6367	0.242495	0.253675	0.242921	0.177449
17.7051	0.252726	0.205769	0.232435	0.203279
17.7734	0.276851	0.210576	0.208225	0.254139
17.8418	0.22692	0.248008	0.282443	0.209721
17.9102	0.202599	0.280924	0.295542	0.241529
17.9785	0.2096	0.275559	0.266727	0.253553
18.0469	0.222411	0.304754	0.257544	0.332441
18.1152	0.248215	0.29415	0.278952	0.31782
18.1836	0.248924	0.256561	0.314173	0.304966
18.252	0.248171	0.317578	0.339462	0.257881
18.3203	0.257752	0.265943	0.309763	0.209261
18.3887	0.249091	0.297405	0.314537	0.210549
18.457	0.274582	0.282919	0.394822	0.240172
18.5254	0.229818	0.233229	0.364802	0.214003
18.5938	0.267748	0.237394	0.332348	0.194945
18.6621	0.239216	0.24777	0.298447	0.188882
18.7305	0.278279	0.249516	0.264795	0.194847
18.7988	0.251121	0.274035	0.233883	0.203641
18.8672	0.200628	0.279574	0.227199	0.2109
18.9355	0.225628	0.309902	0.224387	0.23415
19.0039	0.24596	0.344433	0.223593	0.203948
19.0723	0.243512	0.35264	0.223128	0.235105
19.1406	0.20594	0.379658	0.210135	0.19448
19.209	0.240069	0.379218	0.196749	0.182848
19.2773	0.208716	0.372245	0.199346	0.182433
19.3457	0.220563	0.397809	0.184585	0.194136
19.4141	0.206808	0.373061	0.25219	0.162639
19.4824	0.161321	0.32886	0.250511	0.219148
19.5508	0.227672	0.287238	0.225892	0.206471
19.6191	0.186629	0.24384	0.20128	0.238753
19.6875	0.21858	0.198434	0.174812	0.269275
19.7559	0.188433	0.190087	0.145587	0.271528
19.8242	0.219501	0.172122	0.117263	0.303738
19.8926	0.207522	0.182345	0.119619	0.286529
19.9609	0.249727	0.189419	0.207489	0.32585
20.0293	0.266258	0.142389	0.205649	0.274482
20.0977	0.239502	0.0987499	0.196538	0.27254
20.166	0.253204	0.142401	0.207942	0.311861
20.2344	0.312855	0.212385	0.230892	0.272281
20.3027	0.274961	0.288733	0.243421	0.281967
20.3711	0.231161	0.304453	0.2096	0.269362
20.4395	0.262799	0.333006	0.239574	0.220493
20.5078	0.305567	0.309954	0.266719	0.210154
20.5762	0.255636	0.292399	0.231533	0.253429
20.6445	0.243987	0.315382	0.198355	0.278616
20.7129	0.25785	0.320841	0.168086	0.31551
20.7812	0.288918	0.335588	0.153406	0.291929
20.8496	0.277421	0.345723	0.234333	0.248556
20.918	0.226927	0.328819	0.207295	0.246285
20.9863	0.214555	0.286466	0.179131	0.228995
21.0547	0.18546	0.316883	0.156134	0.233024
21.123	0.242354	0.341233	0.163496	0.270168
21.1914	0.192761	0.295014	0.165691	0.286957
21.2598	0.16778	0.261227	0.161827	0.311902
21.3281	0.151928	0.251257	0.235249	0.27143
21.3965	0.105549	0.262453	0.22719	0.284347
21.4648	0.125552	0.241675	0.200714	0.313736
21.5332	0.0916117	0.277484	0.191201	0.309126
21.6016	0.108705	0.30095	0.265017	0.312914
21.6699	0.130082	0.323203	0.240172	0.290458
21.7383	0.128196	0.364926	0.213857	0.349474
21.8066	0.185668	0.35633	0.191181	0.303602
21.875	0.160696	0.316564	0.207189	0.252154
21.9434	0.187963	0.325494	0.241679	0.215651
22.0117	0.207885	0.379889	0.227481	0.190535
22.0801	0.238454	0.341666	0.251083	0.240985
22.1484	0.255146	0.338647	0.278702	0.190758
22.2168	0.299135	0.338207	0.257489	0.145208
22.2852	0.266159	0.411823	0.268234	0.163612
22.3535	0.305142	0.367292	0.294415	0.221985
22.4219	0.29244	0.317996	0.279896	0.23667
22.4902	0.346433	0.316753	0.316812	0.245062
22.5586	0.339629	0.308969	0.294137	0.257817
22.627	0.289859	0.305789	0.261297	0.212419
22.6953	0.286438	0.297193	0.227476	0.173739
22.7637	0.292153	0.250734	0.197127	0.179793
22.832	0.329914	0.210816	0.207478	0.171712
22.9004	0.281848	0.197053	0.174541	0.173154
22.9688	0.234496	0.18313	0.146538	0.18873
23.0371	0.191275	0.200376	0.123943	0.215041
23.1055	0.170176	0.176521	0.146814	0.226744
23.1738	0.187511	0.259579	0.178402	0.238768
23.2422	0.182804	0.304765	0.179143	0.231981
23.3105	0.182621	0.329444	0.154442	0.188858
23.3789	0.169188	0.373425	0.153005	0.201364
23.4473	0.179018	0.32744	0.199371	0.202573
23.5156	0.192801	0.328945	0.226284	0.241315
23.584	0.198267	0.358871	0.24463	0.230486
23.6523	0.219805	0.336302	0.217021	0.267871
23.7207	0.208959	0.289682	0.230522	0.250742
23.7891	0.257295	0.250318	0.233689	0.294097
23.8574	0.226754	0.299707	0.207703	0.316053
23.9258	0.184256	0.281669	0.181556	0.359167
23.9941	0.208614	0.232703	0.163558	0.338816
24.0625	0.219817	0.186155	0.210816	0.289384
24.1309	0.258061	0.145023	0.246037	0.237453
24.1992	0.305031	0.169132	0.218436	0.188359
24.2676	0.273268	0.186057	0.192691	0.204096
24.3359	0.279144	0.180539	0.19311	0.173725
24.4043	0.245847	0.203844	0.175441	0.153767
24.4727	0.285063	0.251682	0.175128	0.17807
24.541	0.312257	0.206766	0.154068	0.211565
24.6094	0.302134	0.215374	0.201567	0.168361
24.6777	0.310269	0.262971	0.181881	0.142675
24.7461	0.297245	0.286437	0.178749	0.172465
24.8145	0.346722	0.376124	0.1983	0.147992
24.8828	0.312774	0.328202	0.244425	0.207016
24.9512	0.298778	0.281494	0.212622	0.18779
25.0195	0.314506	0.268543	0.263424	0.209739
25.0879	0.322632	0.245829	0.238739	0.220871
25.1562	0.343125	0.213978	0.247073	0.213192
25.2246	0.298361	0.242852	0.290041	0.22336
25.293	0.251982	0.196714	0.255826	0.266233
25.3613	0.199311	0.150086	0.223452	0.244259
25.4297	0.158106	0.137858	0.193432	0.240381
25.498	0.177137	0.206548	0.165831	0.273321
25.5664	0.120585	0.177606	0.156399	0.225585
25.6348	0.0922936	0.21851	0.206236	0.178026
25.7031	0.137174	0.180447	0.238548	0.231706
25.7715	0.133673	0.22426	0.291528	0.208615
25.8398	0.160136	0.246922	0.267237	0.16112
25.9082	0.154859	0.282088	0.307143	0.184531
25.9766	0.185605	0.290536	0.361915	0.225218
26.0449	0.171127	0.278308	0.327363	0.272936
26.1133	0.18434	0.272781	0.323989	0.289484
26.1816	0.208465	0.260875	0.344272	0.299492
26.25	0.255025	0.243818	0.327245	0.33138
26.3184	0.263882	0.213984	0.296093	0.314091
26.3867	0.296645	0.213384	0.266957	0.314487
26.4551	0.295731	0.215451	0.239605	0.312779
26.5234	0.298931	0.263297	0.247047	0.311239
26.5918	0.310617	0.216597	0.2272	0.346358
26.6602	0.25867	0.172717	0.222854	0.351439
26.7285	0.271729	0.178095	0.207362	0.303631
26.7969	0.286236	0.180323	0.246384	0.259446
26.8652	0.306809	0.167613	0.274413	0.294324
26.9336	0.330524	0.17864	0.247463	0.273
27.002	0.380322	0.205336	0.240771	0.23383
27.0703	0.341047	0.161617	0.256939	0.255706
27.1387	0.294756	0.181853	0.242822	0.240514
27.207	0.274139	0.199099	0.28006	0.239536
27.2754	0.256672	0.158209	0.326024	0.297508
27.3438	0.281359	0.165121	0.294622	0.286848
27.4121	0.291181	0.130442	0.261203	0.260591
27.4805	0.242302	0.131304	0.227391	0.292077
27.5488	0.187695	0.138209	0.194302	0.240227
27.6172	0.167078	0.101923	0.184379	0.204295
27.6855	0.210576	0.161645	0.182861	0.184338
27.7539	0.164607	0.120835	0.168101	0.164871
27.8223	0.198905	0.136225	0.223427	0.223397
27.8906	0.199847	0.171319	0.200671	0.243497
27.959	0.191581	0.138014	0.183082	0.282094
28.0273	0.193415	0.207757	0.224041	0.257372
28.0957	0.257983	0.162253	0.238104	0.28975
28.1641	0.270802	0.126369	0.207112	0.257121
28.2324	0.282729	0.168164	0.17927	0.28279
28.3008	0.308059	0.184286	0.153686	0.283347
28.3691	0.293091	0.13814	0.132706	0.307891
28.4375	0.293631	0.124787	0.128279	0.323467
28.5059	0.298374	0.18774	0.123363	0.347681
28.5742	0.273555	0.151935	0.123541	0.342509
28.6426	0.300339	0.13074	0.180329	0.330797
28.7109	0.285218	0.145327	0.2313	0.287014
28.7793	0.233681	0.185587	0.261024	0.245987
28.8477	0.227841	0.211962	0.234476	0.210288
28.916	0.240973	0.229209	0.210507	0.268903
28.9844	0.238364	0.288843	0.229665	0.249597
29.0527	0.303743	0.269029	0.214575	0.272043
29.1211	0.254061	0.25648	0.228807	0.256047
29.1895	0.208662	0.270577	0.201278	0.241988
29.2578	0.163007	0.272323	0.230529	0.264587
29.3262	0.126399	0.256945	0.203169	0.297126
29.3945	0.172814	0.268864	0.171855	0.26215
29.4629	0.121019	0.303234	0.155633	0.255444
29.5312	0.0955566	0.314181	0.235194	0.205128
29.5996	0.102807	0.276761	0.200079	0.211978
29.668	0.114814	0.230382	0.182169	0.262926
29.7363	0.174384	0.209275	0.204308	0.208745
29.8047	0.127281	0.181057	0.21159	0.225768
29.873	0.0766997	0.139684	0.191662	0.221239
29.9414	0.0942032	0.0977405	0.186264	0.172787
30.0098	0.114198	0.119993	0.240866	0.154686
30.0781	0.145426	0.15307	0.246131	0.223795
30.1465	0.169792	0.189698	0.321642	0.205951
30.2148	0.205617	0.228263	0.305427	0.230166
30.2832	0.225137	0.27958	0.266681	0.254701
30.3516	0.242625	0.236191	0.231092	0.258328
30.4199	0.287907	0.26361	0.218188	0.22909
30.4883	0.260508	0.274959	0.280128	0.275434
30.5566	0.245138	0.285833	0.300169	0.263641
30.625	0.277009	0.317045	0.264822	0.250385
30.6934	0.322935	0.337611	0.235365	0.310221
30.7617	0.289396	0.299299	0.210833	0.28946
30.8301	0.329183	0.335446	0.202043	0.248185
30.8984	0.288862	0.291156	0.228626	0.210951
30.9668	0.295944	0.243491	0.297355	0.208206
31.0352	0.280011	0.218181	0.270317	0.256479
31.1035	0.329328	0.239301	0.245552	0.293212
31.1719	0.290052	0.247106	0.275759	0.247582
31.2402	0.238586	0.292043	0.281915	0.26744
31.3086	0.190198	0.239284	0.256653	0.266544
31.377	0.145764	0.221166	0.231639	0.292212
31.4453	0.185871	0.223153	0.313129	0.290914
31.5137	0.154511	0.219965	0.291659	0.238902
31.582	0.22079	0.232696	0.263977	0.197884
31.6504	0.173117	0.186389	0.232913	0.215147
31.7188	0.14604	0.202671	0.220089	0.227654
31.7871	0.168951	0.216527	0.254177	0.174928
31.8555	0.179263	0.256217	0.276638	0.160708
31.9238	0.210572	0.276211	0.240559	0.160944
31.9922	0.21337	0.230724	0.202223	0.199694
32.0605	0.165866	0.1912	0.168563	0.169725
32.1289	0.197898	0.186485	0.157193	0.166409
32.1973	0.222256	0.231993	0.156319	0.172945
32.2656	0.243544	0.236969	0.137597	0.227598
32.334	0.231412	0.295478	0.11726	0.22597
32.4023	0.245758	0.293504	0.11518	0.259562
32.4707	0.215538	0.351129	0.126495	0.256969
32.5391	0.247562	0.336804	0.139594	0.288536
32.6074	0.253189	0.345974	0.190886	0.242094
32.6758	0.24735	0.317844	0.265353	0.214952
32.7441	0.261784	0.275732	0.279416	0.264286
32.8125	0.265715	0.232591	0.273696	0.271625
32.8809	0.211509	0.187008	0.279281	0.22777
32.9492	0.185002	0.176484	0.248297	0.215005
33.0176	0.192164	0.152058	0.254534	0.22081
33.0859	0.151522	0.206943	0.260594	0.198844
33.1543	0.171766	0.255191	0.256168	0.25156
33.2227	0.140084	0.247736	0.343154	0.215218
33.291	0.144096	0.250928	0.314339	0.279329
33.3594	0.19882	0.252835	0.286007	0.300072
33.4277	0.223347	0.30367	0.258816	0.2823
33.4961	0.21185	0.270365	0.231295	0.25532
33.5645	0.240973	0.2814	0.201838	0.240457
33.6328	0.22537	0.27192	0.182875	0.197655
33.7012	0.256269	0.291746	0.18871	0.157191
33.7695	0.25656	0.240691	0.208992	0.145719
33.8379	0.277053	0.238395	0.210054	0.177929
33.9062	0.250618	0.206464	0.235833	0.212155
33.9746	0.266418	0.216768	0.258527	0.182845
34.043	0.301439	0.233371	0.314263	0.177986
34.1113	0.343411	0.194417	0.279389	0.257678
34.1797	0.351786	0.259861	0.285706	0.214064
34.248	0.299348	0.225198	0.276756	0.168112
34.3164	0.277598	0.184219	0.343074	0.173844
34.3848	0.278709	0.168118	0.308121	0.179078
34.4531	0.316961	0.145797	0.277852	0.158317
34.5215	0.3452	0.175322	0.289336	0.204179
34.5898	0.360196	0.154938	0.319952	0.157014
34.6582	0.36792	0.142469	0.304139	0.186483
34.7266	0.364178	0.164802	0.269194	0.162733

## Sheet: Fig 1l
Distance (um)	Roughness (um)	Roughness (um)	Roughness (um)	Roughness (um)
0	0.456626	0.381215	0.467662	0.43065
0.0683594	0.433329	0.384726	0.441681	0.475382
0.136719	0.440319	0.420059	0.490847	0.466411
0.205078	0.401439	0.392131	0.468892	0.489809
0.273438	0.393998	0.402679	0.484757	0.515919
0.341797	0.43522	0.444995	0.484766	0.468991
0.410156	0.41195	0.432403	0.532808	0.472398
0.478516	0.463086	0.491096	0.554698	0.443873
0.546875	0.481497	0.460183	0.536166	0.421346
0.615234	0.480792	0.490887	0.528096	0.481523
0.683594	0.508541	0.482567	0.502198	0.431446
0.751953	0.468127	0.507001	0.488267	0.383888
0.820312	0.462521	0.490602	0.517907	0.381928
0.888672	0.518038	0.520978	0.532649	0.366165
0.957031	0.475324	0.474455	0.534958	0.359576
1.02539	0.519724	0.468298	0.550685	0.337213
1.09375	0.481939	0.428732	0.538398	0.311865
1.16211	0.473703	0.404692	0.571954	0.289502
1.23047	0.469274	0.435589	0.58916	0.293238
1.29883	0.474923	0.406456	0.632301	0.319566
1.36719	0.462333	0.375871	0.584193	0.353043
1.43555	0.514263	0.349942	0.556049	0.344783
1.50391	0.547818	0.35463	0.536422	0.386201
1.57227	0.56171	0.350281	0.51392	0.370192
1.64062	0.597976	0.360447	0.494758	0.356866
1.70898	0.639281	0.405666	0.469955	0.378512
1.77734	0.579204	0.454171	0.439758	0.424969
1.8457	0.54665	0.466719	0.458498	0.372016
1.91406	0.526748	0.466806	0.516427	0.350557
1.98242	0.552224	0.473247	0.57044	0.37705
2.05078	0.55445	0.455424	0.561411	0.430847
2.11914	0.58072	0.472381	0.584889	0.441237
2.1875	0.548549	0.508399	0.54549	0.418025
2.25586	0.575367	0.510786	0.546374	0.488198
2.32422	0.558313	0.508519	0.572153	0.456798
2.39258	0.576888	0.552122	0.536094	0.509444
2.46094	0.572623	0.540324	0.520493	0.476072
2.5293	0.536892	0.517654	0.499168	0.499936
2.59766	0.536434	0.54844	0.496904	0.472452
2.66602	0.570701	0.501425	0.494064	0.503382
2.73438	0.518539	0.452684	0.473807	0.49734
2.80273	0.478125	0.463972	0.413403	0.468186
2.87109	0.442778	0.412684	0.43584	0.483095
2.93945	0.407704	0.435611	0.449815	0.505781
3.00781	0.38457	0.398618	0.425314	0.514966
3.07617	0.374911	0.390627	0.432552	0.505858
3.14453	0.365005	0.42051	0.4003	0.537746
3.21289	0.357426	0.365689	0.422656	0.526639
3.28125	0.414916	0.390999	0.446161	0.580107
3.34961	0.475062	0.44394	0.454577	0.571628
3.41797	0.43966	0.403059	0.457515	0.600723
3.48633	0.460288	0.383511	0.434849	0.6035
3.55469	0.456106	0.403645	0.50888	0.583684
3.62305	0.405806	0.38385	0.566371	0.576876
3.69141	0.42271	0.393522	0.551318	0.569027
3.75977	0.399495	0.364773	0.564964	0.530123
3.82812	0.427709	0.396491	0.537724	0.497464
3.89648	0.462195	0.375409	0.530284	0.532419
3.96484	0.462531	0.405319	0.562388	0.490256
4.0332	0.450735	0.428137	0.547334	0.538712
4.10156	0.447977	0.370687	0.57733	0.51509
4.16992	0.458856	0.398215	0.560058	0.561464
4.23828	0.464587	0.398248	0.525807	0.555834
4.30664	0.456817	0.414794	0.565388	0.517861
4.375	0.485606	0.464504	0.518074	0.564017
4.44336	0.513301	0.43496	0.476292	0.513119
4.51172	0.493508	0.4655	0.515325	0.512116
4.58008	0.561213	0.418402	0.514238	0.493724
4.64844	0.556072	0.449271	0.501157	0.487136
4.7168	0.569252	0.442074	0.557552	0.548354
4.78516	0.586402	0.391854	0.5979	0.50389
4.85352	0.552808	0.42631	0.667221	0.462823
4.92188	0.57905	0.422619	0.692506	0.44895
4.99023	0.591053	0.428731	0.687147	0.459039
5.05859	0.56759	0.413044	0.762001	0.439853
5.12695	0.546045	0.405382	0.766117	0.423487
5.19531	0.500784	0.430664	0.802357	0.433768
5.26367	0.464259	0.433052	0.816962	0.454619
5.33203	0.490584	0.406383	0.828308	0.398216
5.40039	0.436861	0.354301	0.837846	0.391326
5.46875	0.453355	0.340449	0.831118	0.420174
5.53711	0.459332	0.318272	0.784105	0.404795
5.60547	0.494776	0.320249	0.743939	0.412748
5.67383	0.458963	0.342382	0.711852	0.421385
5.74219	0.465489	0.317521	0.710491	0.448563
5.81055	0.502905	0.33593	0.701873	0.45427
5.87891	0.443869	0.375425	0.742001	0.504315
5.94727	0.388009	0.319783	0.732808	0.47768
6.01562	0.403161	0.266496	0.671062	0.492671
6.08398	0.398677	0.246153	0.625583	0.516453
6.15234	0.406216	0.288168	0.63923	0.488147
6.2207	0.426297	0.299456	0.612674	0.525019
6.28906	0.418143	0.321261	0.614901	0.506572
6.35742	0.437622	0.331344	0.58495	0.499436
6.42578	0.408354	0.286957	0.557545	0.545016
6.49414	0.434021	0.305858	0.560867	0.510303
6.5625	0.467576	0.29469	0.533846	0.536467
6.63086	0.442361	0.242362	0.584847	0.540066
6.69922	0.467207	0.257128	0.576229	0.48662
6.76758	0.458095	0.278466	0.587739	0.509389
6.83594	0.449942	0.263656	0.603905	0.521833
6.9043	0.454167	0.294114	0.538517	0.467703
6.97266	0.404113	0.282864	0.534719	0.46492
7.04102	0.3947	0.283992	0.510409	0.445269
7.10938	0.355847	0.305248	0.445486	0.394644
7.17773	0.323676	0.290986	0.386068	0.397832
7.24609	0.310128	0.320814	0.35776	0.423037
7.31445	0.324431	0.327967	0.351661	0.442602
7.38281	0.294478	0.341391	0.30317	0.437766
7.45117	0.258802	0.338713	0.332508	0.399355
7.51953	0.288249	0.303911	0.344101	0.422835
7.58789	0.285162	0.35981	0.393184	0.372731
7.65625	0.232287	0.35516	0.413266	0.377562
7.72461	0.209318	0.40005	0.421271	0.36147
7.79297	0.204341	0.404574	0.44108	0.32106
7.86133	0.257094	0.430404	0.481208	0.332628
7.92969	0.229441	0.474418	0.475849	0.354767
7.99805	0.275676	0.445586	0.505982	0.351985
8.06641	0.254678	0.470403	0.543892	0.347724
8.13477	0.219002	0.451539	0.51813	0.324813
8.20312	0.279751	0.464553	0.548838	0.370175
8.27148	0.223727	0.498516	0.534497	0.330449
8.33984	0.244356	0.47664	0.49978	0.28259
8.4082	0.247294	0.457941	0.517945	0.320722
8.47656	0.276576	0.496095	0.478792	0.344997
8.54492	0.283238	0.460115	0.467299	0.304012
8.61328	0.250438	0.484548	0.473414	0.32804
8.68164	0.294782	0.460865	0.468357	0.30973
8.75	0.278769	0.425351	0.434763	0.372756
8.81836	0.292113	0.393042	0.409823	0.343738
8.88672	0.28103	0.41019	0.354814	0.307929
8.95508	0.236727	0.40083	0.311854	0.331464
9.02344	0.282414	0.358688	0.339933	0.297298
9.0918	0.27678	0.387558	0.315295	0.292873
9.16016	0.227109	0.414018	0.36216	0.309835
9.22852	0.207755	0.421719	0.326649	0.321595
9.29688	0.195822	0.47288	0.283525	0.265219
9.36523	0.189805	0.492466	0.338415	0.279252
9.43359	0.213282	0.463771	0.367835	0.304731
9.50195	0.247795	0.430503	0.3286	0.32153
9.57031	0.254704	0.481555	0.362786	0.360538
9.63867	0.278728	0.498375	0.347897	0.347404
9.70703	0.279557	0.501174	0.35141	0.325452
9.77539	0.298981	0.500549	0.330003	0.336938
9.84375	0.281571	0.470595	0.34365	0.403715
9.91211	0.268899	0.440174	0.360008	0.358923
9.98047	0.252803	0.441138	0.320937	0.366684
10.0488	0.265052	0.473185	0.337021	0.399668
10.1172	0.253804	0.448132	0.275138	0.367966
10.1855	0.293685	0.478837	0.265698	0.40095
10.2539	0.319955	0.486702	0.303444	0.370754
10.3223	0.300847	0.450174	0.268755	0.374326
10.3906	0.321969	0.452398	0.308966	0.342706
10.459	0.275831	0.442736	0.271319	0.367447
10.5273	0.300979	0.507454	0.263303	0.350807
10.5957	0.299425	0.47843	0.306937	0.363745
10.6641	0.293791	0.515625	0.28553	0.380954
10.7324	0.324662	0.475538	0.300847	0.398546
10.8008	0.301282	0.516841	0.298719	0.423068
10.8691	0.340697	0.470646	0.293908	0.382165
10.9375	0.327642	0.483413	0.267599	0.382148
11.0059	0.369358	0.484541	0.306057	0.383912
11.0742	0.349072	0.428269	0.32225	0.389537
11.1426	0.345848	0.3947	0.268172	0.420631
11.2109	0.358453	0.429101	0.227294	0.373375
11.2793	0.363143	0.471034	0.242748	0.362925
11.3477	0.349622	0.4858	0.27655	0.377833
11.416	0.3536	0.47162	0.237397	0.422949
11.4844	0.38239	0.515332	0.235023	0.372707
11.5527	0.343482	0.497263	0.20603	0.400843
11.6211	0.347378	0.500527	0.172738	0.448341
11.6895	0.365378	0.477638	0.215632	0.43203
11.7578	0.378092	0.446561	0.232921	0.472983
11.8262	0.372705	0.404337	0.271954	0.509855
11.8945	0.411655	0.419323	0.258954	0.508059
11.9629	0.44573	0.483164	0.264276	0.515272
12.0312	0.451871	0.52066	0.288	0.507889
12.0996	0.496682	0.556842	0.268428	0.510365
12.168	0.457993	0.49983	0.303572	0.564682
12.2363	0.488864	0.492332	0.312782	0.554232
12.3047	0.476986	0.508111	0.277354	0.528473
12.373	0.49934	0.469667	0.301078	0.484229
12.4414	0.529663	0.486186	0.253107	0.474326
12.5098	0.487962	0.46494	0.251555	0.448266
12.5781	0.459434	0.44268	0.241403	0.433928
12.6465	0.50701	0.439372	0.274959	0.408634
12.7148	0.522107	0.467913	0.239941	0.40692
12.7832	0.622729	0.406191	0.240333	0.409204
12.8516	0.665239	0.341594	0.293305	0.432521
12.9199	0.662234	0.345105	0.244239	0.42144
12.9883	0.662104	0.355735	0.264567	0.455464
13.0566	0.621033	0.387453	0.25877	0.452381
13.125	0.625806	0.334057	0.2817	0.399401
13.1934	0.68094	0.353396	0.278149	0.380543
13.2617	0.708224	0.361425	0.240666	0.362316
13.3301	0.665099	0.398702	0.223312	0.343869
13.3984	0.69764	0.386028	0.274066	0.337828
13.4668	0.651174	0.450006	0.249181	0.321599
13.5352	0.618072	0.490515	0.245164	0.315503
13.6035	0.638701	0.490547	0.291235	0.325319
13.6719	0.637668	0.546912	0.247783	0.333737
13.7402	0.59709	0.544562	0.22895	0.382358
13.8086	0.568178	0.570338	0.258535	0.373003
13.877	0.546551	0.566235	0.254572	0.418365
13.9453	0.525471	0.589463	0.298836	0.404656
14.0137	0.496641	0.595274	0.286631	0.394096
14.082	0.463978	0.605987	0.288145	0.405362
14.1504	0.430082	0.546922	0.239709	0.40981
14.2188	0.394515	0.505246	0.269622	0.404508
14.2871	0.378584	0.459025	0.279626	0.403479
14.3555	0.355067	0.454292	0.299298	0.40642
14.4238	0.332399	0.486886	0.289475	0.416016
14.4922	0.309348	0.455973	0.243585	0.410002
14.5605	0.309438	0.489389	0.255972	0.433866
14.6289	0.309856	0.531568	0.240754	0.427469
14.6973	0.352284	0.488852	0.247116	0.448321
14.7656	0.41881	0.526841	0.197584	0.447538
14.834	0.379684	0.526846	0.249433	0.457928
14.9023	0.404749	0.569272	0.213293	0.442548
14.9707	0.390324	0.550819	0.26024	0.478873
15.0391	0.404928	0.576293	0.217691	0.43964
15.1074	0.390448	0.520952	0.226902	0.426643
15.1758	0.380871	0.459613	0.222145	0.437198
15.2441	0.359381	0.454142	0.237298	0.411658
15.3125	0.322856	0.495307	0.24596	0.361882
15.3809	0.305199	0.44569	0.218309	0.336425
15.4492	0.291267	0.455938	0.252413	0.380855
15.5176	0.283744	0.444523	0.188914	0.360382
15.5859	0.315299	0.488318	0.227125	0.419875
15.6543	0.316977	0.569111	0.219931	0.431689
15.7227	0.35086	0.587218	0.252693	0.419568
15.791	0.366505	0.616307	0.28173	0.42963
15.8594	0.369114	0.643369	0.230993	0.4065
15.9277	0.390701	0.653452	0.246146	0.444714
15.9961	0.370334	0.694453	0.29501	0.488405
16.0645	0.375435	0.685422	0.284393	0.48691
16.1328	0.373142	0.66497	0.287414	0.435847
16.2012	0.333276	0.676559	0.278632	0.41992
16.2695	0.347031	0.668568	0.258512	0.456956
16.3379	0.363196	0.650827	0.277307	0.46647
16.4062	0.34825	0.697634	0.253599	0.422226
16.4746	0.374986	0.694217	0.23871	0.433192
16.543	0.325672	0.692825	0.248879	0.402421
16.6113	0.341481	0.633458	0.216161	0.36905
16.6797	0.386592	0.592139	0.232492	0.40814
16.748	0.436606	0.58716	0.177565	0.375425
16.8164	0.3848	0.637062	0.160293	0.363222
16.8848	0.395926	0.642763	0.180129	0.41072
16.9531	0.337273	0.652217	0.224447	0.364011
17.0215	0.288287	0.702036	0.233739	0.333104
17.0898	0.261594	0.690293	0.237089	0.373153
17.1582	0.236297	0.665651	0.241369	0.367441
17.2266	0.235839	0.687401	0.254632	0.314816
17.2949	0.205256	0.694143	0.264253	0.284621
17.3633	0.235799	0.632969	0.263687	0.263518
17.4316	0.291152	0.591266	0.305266	0.259093
17.5	0.257311	0.563365	0.262855	0.268935
17.5684	0.288648	0.531685	0.301313	0.296935
17.6367	0.328939	0.48445	0.244633	0.348869
17.7051	0.315473	0.438147	0.262798	0.298299
17.7734	0.372826	0.424459	0.252208	0.269363
17.8418	0.351335	0.464338	0.230418	0.264993
17.9102	0.387026	0.431919	0.281473	0.277848
17.9785	0.38372	0.469689	0.238212	0.302588
18.0469	0.385316	0.471036	0.265333	0.310924
18.1152	0.410545	0.45702	0.319072	0.308936
18.1836	0.41477	0.470526	0.28493	0.326885
18.252	0.440054	0.504298	0.338998	0.325691
18.3203	0.404406	0.503755	0.373485	0.308641
18.3887	0.432812	0.462381	0.374452	0.314759
18.457	0.44328	0.499357	0.418551	0.296696
18.5254	0.435839	0.456777	0.41856	0.308756
18.5938	0.43319	0.500024	0.444667	0.319612
18.6621	0.408386	0.459581	0.461325	0.287034
18.7305	0.45777	0.438828	0.463963	0.306873
18.7988	0.42182	0.465644	0.463396	0.299572
18.8672	0.425798	0.4074	0.468882	0.29323
18.9355	0.451137	0.356222	0.511393	0.328376
19.0039	0.399659	0.389281	0.490807	0.327429
19.0723	0.366612	0.380249	0.522775	0.328618
19.1406	0.329293	0.342463	0.470696	0.323946
19.209	0.320592	0.361254	0.479906	0.359476
19.2773	0.31148	0.322345	0.430757	0.321668
19.3457	0.337668	0.272727	0.478417	0.339918
19.4141	0.320395	0.247538	0.493953	0.321197
19.4824	0.278393	0.231303	0.509845	0.328575
19.5508	0.295845	0.206963	0.485343	0.377414
19.6191	0.281037	0.206174	0.47029	0.376549
19.6875	0.269542	0.241233	0.455894	0.397894
19.7559	0.30359	0.225245	0.438457	0.352856
19.8242	0.344593	0.26474	0.419679	0.345582
19.8926	0.398824	0.280218	0.452578	0.365804
19.9609	0.392505	0.261191	0.393707	0.349876
20.0293	0.400208	0.266125	0.399576	0.343288
20.0977	0.414566	0.269855	0.37984	0.340998
20.166	0.406193	0.314526	0.38716	0.349965
20.2344	0.399463	0.274247	0.353621	0.344827
20.3027	0.3734	0.300269	0.325423	0.396214
20.3711	0.392111	0.270479	0.385214	0.357282
20.4395	0.380014	0.31274	0.446594	0.409463
20.5078	0.345708	0.305871	0.443042	0.417471
20.5762	0.390107	0.310012	0.470628	0.366983
20.6445	0.336767	0.314207	0.453849	0.338924
20.7129	0.343046	0.282281	0.486912	0.339565
20.7812	0.294855	0.299402	0.433327	0.341931
20.8496	0.278951	0.274048	0.449356	0.345584
20.918	0.265567	0.312612	0.442244	0.350032
20.9863	0.280636	0.31563	0.453426	0.382386
21.0547	0.329335	0.30794	0.463677	0.386751
21.123	0.279638	0.293705	0.433944	0.373042
21.1914	0.266007	0.345633	0.473689	0.420074
21.2598	0.254047	0.374421	0.440862	0.438461
21.3281	0.262407	0.347095	0.389824	0.396846
21.3965	0.214517	0.385331	0.365186	0.407565
21.4648	0.188371	0.377887	0.355445	0.359925
21.5332	0.231127	0.332158	0.393026	0.345038
21.6016	0.218619	0.312966	0.356585	0.333931
21.6699	0.221639	0.360486	0.364425	0.378334
21.7383	0.207324	0.315551	0.411318	0.399761
21.8066	0.217464	0.37041	0.355597	0.373345
21.875	0.2155	0.321121	0.392138	0.382475
21.9434	0.227967	0.329068	0.416821	0.343571
22.0117	0.206833	0.363086	0.403273	0.358617
22.0801	0.202787	0.342415	0.450604	0.369966
22.1484	0.205971	0.333055	0.419941	0.407331
22.2168	0.218686	0.373125	0.4676	0.364347
22.2852	0.249447	0.330464	0.408154	0.393222
22.3535	0.248852	0.350241	0.398414	0.37839
22.4219	0.244587	0.344523	0.427615	0.388644
22.4902	0.247689	0.304354	0.413739	0.405689
22.5586	0.242849	0.302141	0.431192	0.404741
22.627	0.267148	0.348154	0.490518	0.412201
22.6953	0.244863	0.295195	0.453118	0.382307
22.7637	0.251005	0.335101	0.441542	0.429257
22.832	0.296664	0.334641	0.481999	0.392079
22.9004	0.298588	0.333387	0.444188	0.404687
22.9688	0.324311	0.346072	0.44888	0.410477
23.0371	0.352142	0.312721	0.407098	0.382363
23.1055	0.366499	0.284273	0.436765	0.410581
23.1738	0.39863	0.294821	0.43146	0.388164
23.2422	0.44722	0.253529	0.37678	0.386723
23.3105	0.387335	0.270349	0.347048	0.416557
23.3789	0.399392	0.272737	0.313783	0.420129
23.4473	0.385761	0.273153	0.32124	0.367888
23.5156	0.387521	0.299394	0.376184	0.365352
23.584	0.368605	0.318049	0.349875	0.422517
23.6523	0.33271	0.264543	0.377324	0.390186
23.7207	0.369277	0.222073	0.405649	0.402082
23.7891	0.419701	0.212575	0.425485	0.465902
23.8574	0.462512	0.254508	0.446416	0.422534
23.9258	0.49645	0.258183	0.466333	0.442372
23.9941	0.51026	0.304086	0.426797	0.478067
24.0625	0.494576	0.275884	0.496475	0.463482
24.1309	0.446631	0.3027	0.480243	0.428439
24.1992	0.416952	0.318096	0.459001	0.45611
24.2676	0.441442	0.267356	0.443235	0.495748
24.3359	0.47245	0.270237	0.407587	0.452873
24.4043	0.441293	0.226316	0.464832	0.484049
24.4727	0.493716	0.218817	0.408727	0.471517
24.541	0.460669	0.227312	0.368068	0.447018
24.6094	0.47656	0.215733	0.40209	0.480495
24.6777	0.473309	0.274672	0.397169	0.443645
24.7461	0.458582	0.225986	0.416374	0.424842
24.8145	0.474857	0.263427	0.40395	0.428742
24.8828	0.458296	0.240456	0.407299	0.492014
24.9512	0.444611	0.261959	0.362971	0.455794
25.0195	0.40406	0.24263	0.366019	0.501155
25.0879	0.39629	0.283714	0.339765	0.466195
25.1562	0.392354	0.225141	0.30943	0.483706
25.2246	0.399098	0.196446	0.273289	0.472379
25.293	0.421643	0.182019	0.255525	0.423233
25.3613	0.421733	0.181888	0.278948	0.40936
25.4297	0.429107	0.223985	0.334686	0.47003
25.498	0.476902	0.178338	0.290385	0.466864
25.5664	0.427889	0.161474	0.318628	0.456085
25.6348	0.446355	0.220303	0.309818	0.474719
25.7031	0.472515	0.174657	0.292793	0.453944
25.7715	0.471427	0.200761	0.254899	0.475289
25.8398	0.467409	0.192194	0.318278	0.479901
25.9082	0.46424	0.185627	0.304649	0.468793
25.9766	0.465616	0.23457	0.301645	0.495204
26.0449	0.451356	0.188349	0.328053	0.442334
26.1133	0.484582	0.231733	0.319736	0.427365
26.1816	0.510523	0.250771	0.344666	0.468838
26.25	0.581815	0.230894	0.336102	0.450528
26.3184	0.580015	0.231064	0.367988	0.443309
26.3867	0.589854	0.219732	0.339378	0.458848
26.4551	0.677879	0.245205	0.341386	0.481069
26.5234	0.748541	0.26701	0.33474	0.451722
26.5918	0.79494	0.249762	0.370486	0.465919
26.6602	0.816034	0.257134	0.311835	0.428029
26.7285	0.840853	0.272448	0.334601	0.413306
26.7969	0.881719	0.286255	0.316316	0.399816
26.8652	0.937949	0.298639	0.316324	0.381041
26.9336	0.937628	0.294783	0.286373	0.404604
27.002	0.965404	0.289475	0.230323	0.370355
27.0703	1.03185	0.30813	0.199961	0.419031
27.1387	1.01696	0.30893	0.219084	0.418823
27.207	1.01373	0.302445	0.229719	0.394954
27.2754	0.980441	0.337969	0.248048	0.407398
27.3438	0.967139	0.343287	0.27892	0.461632
27.4121	0.9758	0.32341	0.222624	0.456577
27.4805	1.00864	0.305122	0.233586	0.475375
27.5488	0.967189	0.311399	0.206483	0.512493
27.6172	0.992802	0.305763	0.20682	0.488241
27.6855	0.942091	0.350105	0.210225	0.555949
27.7539	0.968115	0.30769	0.147082	0.510117
27.8223	0.909928	0.296303	0.116884	0.558737
27.8906	0.884987	0.351408	0.101913	0.511645
27.959	0.87341	0.29782	0.0785339	0.544875
28.0273	0.826971	0.266222	0.072764	0.509203
28.0957	0.824048	0.236569	0.122724	0.470819
28.1641	0.7841	0.290113	0.124951	0.486468
28.2324	0.749246	0.287434	0.125534	0.443264
28.3008	0.756483	0.284345	0.101279	0.43128
28.3691	0.714618	0.27493	0.101534	0.488528
28.4375	0.676751	0.2467	0.133091	0.430262
28.5059	0.654001	0.291591	0.198961	0.423536
28.5742	0.632456	0.237455	0.197163	0.456438
28.6426	0.648319	0.234228	0.218422	0.484437
28.7109	0.604756	0.235986	0.250691	0.445122
28.7793	0.559166	0.196447	0.191656	0.465097
28.8477	0.526831	0.227699	0.207685	0.468915
28.916	0.502685	0.234824	0.181595	0.500721
28.9844	0.47098	0.236582	0.170266	0.449028
29.0527	0.469809	0.213063	0.154062	0.44096
29.1211	0.483208	0.197925	0.131176	0.47608
29.1895	0.448737	0.20746	0.171743	0.507639
29.2578	0.426836	0.19432	0.177311	0.500996
29.3262	0.482245	0.20161	0.174142	0.510756
29.3945	0.427097	0.2178	0.167907	0.507426
29.4629	0.376852	0.265155	0.128453	0.517652
29.5312	0.351966	0.230682	0.165459	0.465959
29.5996	0.384014	0.240847	0.147037	0.444582
29.668	0.364441	0.232692	0.179826	0.444976
29.7363	0.39293	0.22596	0.144042	0.408592
29.8047	0.362429	0.23262	0.152376	0.454885
29.873	0.393738	0.254616	0.177332	0.397578
29.9414	0.400264	0.228687	0.226279	0.414404
30.0098	0.380855	0.257091	0.283825	0.410691
30.0781	0.413067	0.236639	0.300429	0.436225
30.1465	0.368135	0.283282	0.328726	0.44185
30.2148	0.393912	0.298514	0.312249	0.409574
30.2832	0.393125	0.305831	0.327977	0.427906
30.3516	0.375798	0.309178	0.355343	0.449798
30.4199	0.403957	0.301104	0.347903	0.41722
30.4883	0.356314	0.315295	0.394357	0.397076
30.5566	0.379079	0.3173	0.366241	0.453391
30.625	0.338583	0.36868	0.415571	0.441736
30.6934	0.356199	0.425127	0.386961	0.459575
30.7617	0.320934	0.42442	0.422489	0.448413
30.8301	0.353941	0.445677	0.420279	0.420272
30.8984	0.313116	0.476546	0.43179	0.434934
30.9668	0.343741	0.518177	0.471288	0.449624
31.0352	0.301958	0.546965	0.47661	0.416718
31.1035	0.293339	0.582982	0.487079	0.455726
31.1719	0.349404	0.612399	0.492099	0.455491
31.2402	0.299953	0.634368	0.554328	0.436085
31.3086	0.253679	0.708369	0.549434	0.445681
31.377	0.229505	0.738334	0.564998	0.437614
31.4453	0.228335	0.7485	0.549944	0.513017
31.5137	0.249593	0.769537	0.568739	0.498514
31.582	0.251819	0.823766	0.61481	0.462924
31.6504	0.259932	0.844475	0.677861	0.521349
31.7188	0.263746	0.909028	0.723302	0.50638
31.7871	0.261946	0.88937	0.774768	0.477034
31.8555	0.256011	0.90137	0.824892	0.463817
31.9238	0.252869	0.871416	0.829008	0.435594
31.9922	0.280317	0.883306	0.862975	0.441137
32.0605	0.26392	0.855022	0.88952	0.505997
32.1289	0.296352	0.829833	0.864416	0.509021
32.1973	0.276149	0.877735	0.881403	0.527818
32.2656	0.273555	0.863226	0.934595	0.527117
32.334	0.295607	0.842063	0.869672	0.501441
32.4023	0.266778	0.884351	0.894519	0.497782
32.4707	0.271468	0.829722	0.894062	0.462192
32.5391	0.329122	0.764413	0.861646	0.438898
32.6074	0.281643	0.707264	0.932063	0.412756
32.6758	0.298054	0.724495	0.947051	0.442809
32.7441	0.309591	0.726637	0.976006	0.413956
32.8125	0.260824	0.775799	0.992118	0.400384
32.8809	0.29605	0.775832	0.973559	0.379636
32.9492	0.253719	0.817381	0.914277	0.384714
33.0176	0.242087	0.784797	0.912615	0.446151
33.0859	0.244642	0.768426	0.93215	0.415791
33.1543	0.264257	0.794584	0.927722	0.37404
33.2227	0.264566	0.80056	0.954048	0.367861
33.291	0.260547	0.765511	0.953262	0.379895
33.3594	0.255735	0.721289	0.964143	0.374511
33.4277	0.291426	0.703932	0.968286	0.406016
33.4961	0.284532	0.67803	0.991436	0.401891
33.5645	0.340214	0.649582	0.917174	0.405791
33.6328	0.382012	0.607906	0.912966	0.395013
33.7012	0.362767	0.582142	0.851932	0.411099
33.7695	0.356503	0.542438	0.814778	0.410562
33.8379	0.334328	0.524779	0.851565	0.43585
33.9062	0.365172	0.500768	0.826379	0.404615
33.9746	0.365754	0.47755	0.77723	0.386798
34.043	0.331283	0.446883	0.739885	0.380455
34.1113	0.38346	0.415121	0.679891	0.419463
34.1797	0.360026	0.387878	0.63496	0.375
34.248	0.378107	0.338972	0.611253	0.399193
34.3164	0.375513	0.325668	0.637442	0.368039
34.3848	0.433386	0.312665	0.60708	0.377225
34.4531	0.38703	0.342959	0.544238	0.40443
34.5215	0.428828	0.352166	0.513794	0.386448
34.5898	0.414266	0.372026	0.452431	0.401741
34.6582	0.448889	0.331446	0.393068	0.380035
34.7266	0.414993	0.318908	0.336087	0.390042

## Sheet: Fig 1m
Distance (um)	Roughness (um)	Roughness (um)	Roughness (um)	Roughness (um)
0	0.187779	0.14083	0.126854	0.207688
0.0683594	0.217464	0.138283	0.148353	0.190186
0.136719	0.163592	0.165032	0.155245	0.209642
0.205078	0.163268	0.168075	0.150801	0.200203
0.273438	0.150419	0.157471	0.152189	0.186142
0.341797	0.154886	0.164506	0.174085	0.194181
0.410156	0.194536	0.191013	0.170998	0.19376
0.478516	0.203316	0.177614	0.16009	0.18496
0.546875	0.19046	0.163576	0.174568	0.192844
0.615234	0.19277	0.161989	0.158553	0.197369
0.683594	0.19676	0.161605	0.130967	0.184584
0.751953	0.194675	0.168559	0.144645	0.184801
0.820312	0.209678	0.204642	0.149138	0.201542
0.888672	0.2084	0.259633	0.135838	0.187077
0.957031	0.131783	0.211601	0.148159	0.168231
1.02539	0.150294	0.213925	0.166063	0.184246
1.09375	0.168569	0.213058	0.170005	0.163082
1.16211	0.150526	0.192321	0.177609	0.126027
1.23047	0.166725	0.188261	0.210512	0.16472
1.29883	0.156745	0.183886	0.201767	0.163896
1.36719	0.145488	0.168571	0.176177	0.167312
1.43555	0.132	0.171856	0.194801	0.191464
1.50391	0.116195	0.197645	0.196108	0.212996
1.57227	0.0966327	0.185764	0.187041	0.206191
1.64062	0.0971082	0.180266	0.207089	0.205616
1.70898	0.119214	0.203817	0.201859	0.237596
1.77734	0.129103	0.1822	0.197818	0.235502
1.8457	0.152008	0.164097	0.214755	0.223907
1.91406	0.13588	0.157162	0.231464	0.23546
1.98242	0.119281	0.121977	0.219602	0.224987
2.05078	0.138269	0.0986802	0.204474	0.199267
2.11914	0.141137	0.13014	0.220376	0.196615
2.1875	0.113283	0.137094	0.200538	0.196517
2.25586	0.131713	0.131838	0.192028	0.170642
2.32422	0.141448	0.166644	0.204826	0.168232
2.39258	0.133698	0.184289	0.191049	0.187836
2.46094	0.198977	0.170735	0.177748	0.137623
2.5293	0.188997	0.174335	0.206579	0.121324
2.59766	0.199128	0.190226	0.191928	0.162645
2.66602	0.197843	0.152166	0.184292	0.157117
2.73438	0.202948	0.16375	0.190868	0.138742
2.80273	0.160735	0.115315	0.19696	0.140236
2.87109	0.187698	0.0941813	0.171208	0.104699
2.93945	0.187213	0.101854	0.167967	0.0827353
3.00781	0.176924	0.0976333	0.17334	0.112646
3.07617	0.179153	0.0946893	0.161874	0.125315
3.14453	0.18864	0.111299	0.144824	0.130242
3.21289	0.207392	0.133815	0.157306	0.157358
3.28125	0.22263	0.166625	0.152943	0.161883
3.34961	0.248485	0.201438	0.153767	0.164418
3.41797	0.224623	0.212289	0.169998	0.187058
3.48633	0.234673	0.222361	0.186149	0.214812
3.55469	0.224855	0.232426	0.206278	0.208169
3.62305	0.223731	0.251112	0.173592	0.219958
3.69141	0.237377	0.244815	0.195247	0.22928
3.75977	0.225878	0.247697	0.191844	0.215373
3.82812	0.195229	0.270293	0.148938	0.205135
3.89648	0.224753	0.245968	0.159659	0.240152
3.96484	0.201125	0.205281	0.188739	0.234867
4.0332	0.188511	0.22021	0.174639	0.229178
4.10156	0.180137	0.205857	0.169563	0.251979
4.16992	0.186029	0.187431	0.210764	0.26409
4.23828	0.171352	0.180422	0.215022	0.25609
4.30664	0.157858	0.159604	0.267243	0.266366
4.375	0.178922	0.133034	0.219626	0.267867
4.44336	0.164312	0.123707	0.210794	0.241986
4.51172	0.170936	0.0905992	0.202607	0.226641
4.58008	0.248342	0.0829449	0.173429	0.236521
4.64844	0.218251	0.0835958	0.169623	0.215673
4.7168	0.195181	0.0941378	0.188247	0.202001
4.78516	0.224705	0.120007	0.171358	0.224171
4.85352	0.217601	0.168783	0.176731	0.214894
4.92188	0.197166	0.199282	0.238286	0.205455
4.99023	0.223256	0.203763	0.235044	0.223869
5.05859	0.233226	0.259547	0.267308	0.201906
5.12695	0.181914	0.247908	0.23733	0.20635
5.19531	0.196749	0.227648	0.26258	0.246877
5.26367	0.208399	0.238989	0.23922	0.194978
5.33203	0.198258	0.221524	0.200151	0.198072
5.40039	0.204317	0.204779	0.222759	0.186799
5.46875	0.217647	0.237266	0.212731	0.125889
5.53711	0.202319	0.211181	0.190097	0.100492
5.60547	0.209493	0.160119	0.195638	0.102067
5.67383	0.221466	0.179046	0.174993	0.0980577
5.74219	0.209967	0.186712	0.187872	0.0750526
5.81055	0.245236	0.209632	0.1697	0.0930699
5.87891	0.207323	0.179232	0.165021	0.104227
5.94727	0.197189	0.158018	0.149086	0.146105
6.01562	0.196703	0.167841	0.148956	0.177124
6.08398	0.219609	0.156759	0.175959	0.157634
6.15234	0.239557	0.145759	0.158909	0.180039
6.2207	0.212416	0.160534	0.135395	0.190873
6.28906	0.227654	0.148089	0.176361	0.169071
6.35742	0.221826	0.13565	0.166972	0.187081
6.42578	0.214319	0.157051	0.164288	0.174612
6.49414	0.198755	0.164643	0.218579	0.184801
6.5625	0.204096	0.154361	0.218925	0.14321
6.63086	0.206405	0.195228	0.227094	0.161785
6.69922	0.175447	0.177602	0.225767	0.147482
6.76758	0.212786	0.167556	0.240635	0.134133
6.83594	0.219242	0.189198	0.228692	0.155899
6.9043	0.215329	0.181228	0.216675	0.12428
6.97266	0.235117	0.168628	0.235292	0.0954491
7.04102	0.235834	0.181085	0.214493	0.100693
7.10938	0.237983	0.190277	0.178454	0.0915768
7.17773	0.269509	0.167141	0.192367	0.0642578
7.24609	0.26096	0.142332	0.175559	0.0782905
7.31445	0.246431	0.174745	0.159067	0.116339
7.38281	0.241719	0.165499	0.154623	0.0914184
7.45117	0.226075	0.160801	0.142364	0.0996186
7.51953	0.207238	0.170704	0.124192	0.147081
7.58789	0.185607	0.182846	0.16157	0.145867
7.65625	0.16286	0.176394	0.186019	0.143134
7.72461	0.168845	0.194039	0.195948	0.165136
7.79297	0.153913	0.198123	0.223899	0.176763
7.86133	0.156068	0.180894	0.22696	0.236441
7.92969	0.15782	0.188647	0.218289	0.225646
7.99805	0.177608	0.194163	0.231087	0.236319
8.06641	0.186933	0.169031	0.232073	0.237739
8.13477	0.200256	0.154362	0.227393	0.213618
8.20312	0.219647	0.188126	0.222714	0.203622
8.27148	0.216695	0.200429	0.249717	0.227304
8.33984	0.201763	0.220626	0.23434	0.190255
8.4082	0.208145	0.241147	0.224474	0.171168
8.47656	0.217322	0.228144	0.240698	0.103787
8.54492	0.199198	0.218023	0.242006	0.0648232
8.61328	0.18563	0.223217	0.227429	0.0782848
8.68164	0.200068	0.220757	0.241343	0.095825
8.75	0.193683	0.206006	0.225892	0.0842363
8.81836	0.188971	0.202989	0.186177	0.113744
8.88672	0.205406	0.202275	0.191476	0.128724
8.95508	0.194545	0.185845	0.189586	0.125756
9.02344	0.183141	0.177479	0.146437	0.135314
9.0918	0.204037	0.183472	0.175201	0.151813
9.16016	0.207785	0.163212	0.162613	0.136864
9.22852	0.183835	0.158514	0.144447	0.143788
9.29688	0.167639	0.183583	0.163871	0.175526
9.36523	0.174102	0.204184	0.174828	0.162029
9.43359	0.158135	0.218556	0.172225	0.157455
9.50195	0.154861	0.200218	0.155813	0.167336
9.57031	0.150626	0.207972	0.140436	0.172263
9.63867	0.115663	0.225609	0.133042	0.19993
9.70703	0.174081	0.200088	0.155577	0.228799
9.77539	0.193223	0.203373	0.164148	0.250888
9.84375	0.213333	0.236815	0.171436	0.238097
9.91211	0.235996	0.224934	0.202901	0.255953
9.98047	0.23336	0.213369	0.181625	0.249713
10.0488	0.226169	0.218488	0.16817	0.200609
10.1172	0.209086	0.218581	0.190066	0.210402
10.1855	0.193684	0.192818	0.187376	0.210304
10.2539	0.173651	0.20201	0.174001	0.201107
10.3223	0.168859	0.227072	0.191342	0.218567
10.3906	0.181228	0.215272	0.203098	0.2361
10.459	0.175239	0.264679	0.199064	0.220601
10.5273	0.174277	0.253121	0.231967	0.211485
10.5957	0.180336	0.217776	0.251545	0.223912
10.6641	0.188787	0.233828	0.237767	0.203225
10.7324	0.169877	0.233121	0.218244	0.256035
10.8008	0.171072	0.234088	0.238145	0.233911
10.8691	0.1808	0.254212	0.22508	0.236124
10.9375	0.158295	0.251026	0.217686	0.205936
11.0059	0.15238	0.227332	0.235913	0.212617
11.0742	0.16403	0.252328	0.21934	0.191688
11.1426	0.176399	0.251138	0.192158	0.226464
11.2109	0.152691	0.235669	0.195703	0.230041
11.2793	0.132578	0.243415	0.205934	0.200727
11.3477	0.144544	0.234014	0.162954	0.189057
11.416	0.126104	0.207693	0.205116	0.205959
11.4844	0.13424	0.230518	0.175218	0.194525
11.5527	0.16584	0.239232	0.204533	0.198734
11.6211	0.162721	0.219765	0.168171	0.216193
11.6895	0.142849	0.221693	0.198608	0.199888
11.7578	0.143406	0.228566	0.205735	0.187264
11.8262	0.136853	0.212539	0.217491	0.20424
11.8945	0.125119	0.216698	0.221991	0.196878
11.9629	0.12376	0.22341	0.263602	0.179383
12.0312	0.135168	0.203633	0.243353	0.186461
12.0996	0.116486	0.191752	0.249607	0.168334
12.168	0.113374	0.213623	0.245646	0.166556
12.2363	0.140821	0.197919	0.259002	0.193987
12.3047	0.132521	0.196333	0.271242	0.214873
12.373	0.118711	0.229855	0.254831	0.202646
12.4414	0.154537	0.21702	0.210486	0.193524
12.5098	0.152063	0.214318	0.18538	0.206273
12.5781	0.120695	0.183125	0.185646	0.181917
12.6465	0.128508	0.210909	0.192296	0.179743
12.7148	0.145507	0.211957	0.193919	0.180834
12.7832	0.116692	0.193457	0.220358	0.190633
12.8516	0.101048	0.203442	0.226215	0.165081
12.9199	0.090026	0.184297	0.2102	0.151174
12.9883	0.136631	0.155181	0.211265	0.168157
13.0566	0.134714	0.123343	0.223425	0.168535
13.125	0.165595	0.0939846	0.20438	0.180001
13.1934	0.168543	0.106603	0.179992	0.211901
13.2617	0.182827	0.118106	0.218163	0.205258
13.3301	0.194867	0.0909852	0.224013	0.199253
13.3984	0.180425	0.104719	0.203771	0.185823
13.4668	0.184482	0.116383	0.206752	0.181176
13.5352	0.220316	0.0941273	0.234313	0.163923
13.6035	0.213924	0.12941	0.226126	0.123682
13.6719	0.201632	0.153768	0.212268	0.14856
13.7402	0.217113	0.148109	0.180294	0.166416
13.8086	0.20984	0.16017	0.216953	0.159538
13.877	0.194357	0.168642	0.179395	0.170049
13.9453	0.215824	0.155001	0.181738	0.180158
14.0137	0.215023	0.145518	0.201873	0.17033
14.082	0.193869	0.151915	0.198068	0.158022
14.1504	0.202723	0.125822	0.167297	0.188638
14.2188	0.21102	0.109715	0.179053	0.18471
14.2871	0.195933	0.113235	0.179245	0.17591
14.3555	0.22027	0.120027	0.17081	0.202703
14.4238	0.18954	0.146058	0.189037	0.209391
14.4922	0.161767	0.174003	0.202702	0.192131
14.5605	0.1628	0.170421	0.180156	0.204322
14.6289	0.142291	0.201397	0.165256	0.217945
14.6973	0.141805	0.182729	0.178934	0.208433
14.7656	0.17907	0.177635	0.163799	0.20857
14.834	0.174761	0.185469	0.149222	0.224275
14.9023	0.159191	0.196488	0.172872	0.213722
14.9707	0.154801	0.200331	0.173616	0.199096
15.0391	0.156869	0.195317	0.16008	0.213437
15.1074	0.160778	0.196122	0.196101	0.192509
15.1758	0.172348	0.174505	0.19421	0.185388
15.2441	0.21064	0.18457	0.17509	0.219049
15.3125	0.199229	0.199903	0.175672	0.226207
15.3809	0.20377	0.196959	0.154396	0.202564
15.4492	0.219089	0.206392	0.124969	0.211248
15.5176	0.187882	0.233531	0.133937	0.208751
15.5859	0.169449	0.219016	0.158863	0.189979
15.6543	0.184203	0.217027	0.152988	0.154926
15.7227	0.198487	0.227414	0.163233	0.153631
15.791	0.184274	0.21849	0.196538	0.140363
15.8594	0.173904	0.193681	0.194332	0.16141
15.9277	0.193685	0.181719	0.176247	0.172399
15.9961	0.196955	0.182289	0.191834	0.166798
16.0645	0.203176	0.214696	0.184998	0.184808
16.1328	0.230469	0.232186	0.163399	0.215673
16.2012	0.227188	0.214003	0.169336	0.211906
16.2695	0.214736	0.231412	0.173513	0.221779
16.3379	0.203801	0.238124	0.153191	0.206038
16.4062	0.212098	0.220814	0.13989	0.207297
16.4746	0.189587	0.208301	0.171281	0.191952
16.543	0.189424	0.232006	0.176815	0.215795
16.6113	0.168598	0.246305	0.174689	0.211786
16.6797	0.159015	0.251182	0.199052	0.208415
16.748	0.162602	0.239624	0.177701	0.255481
16.8164	0.152064	0.199971	0.154503	0.227288
16.8848	0.168901	0.226553	0.176876	0.204444
16.9531	0.177279	0.220578	0.191986	0.216871
17.0215	0.159874	0.20687	0.182603	0.202326
17.0898	0.164818	0.246057	0.20042	0.186746
17.1582	0.174311	0.238409	0.230615	0.206597
17.2266	0.168	0.223095	0.211885	0.202588
17.2949	0.153874	0.24936	0.202415	0.180302
17.3633	0.198153	0.202135	0.217928	0.188099
17.4316	0.192568	0.195757	0.204466	0.195507
17.5	0.181795	0.201192	0.186704	0.183112
17.5684	0.202691	0.17391	0.198138	0.204562
17.6367	0.204443	0.180145	0.171197	0.231759
17.7051	0.192313	0.198831	0.132282	0.201886
17.7734	0.200845	0.196929	0.1027	0.202346
17.8418	0.198048	0.194784	0.0643431	0.226827
17.9102	0.183768	0.205091	0.0261403	0.216676
17.9785	0.193577	0.188742	0.0387771	0.19654
18.0469	0.216475	0.179092	0.0572396	0.226048
18.1152	0.211521	0.194425	0.0576671	0.25436
18.1836	0.208489	0.191481	0.0757331	0.24732
18.252	0.225804	0.183914	0.116545	0.227903
18.3203	0.206242	0.192621	0.14594	0.212404
18.3887	0.192593	0.187527	0.166962	0.225469
18.457	0.203047	0.150744	0.205449	0.209573
18.5254	0.20623	0.152188	0.181619	0.20037
18.5938	0.184518	0.193458	0.178217	0.21791
18.6621	0.185235	0.192751	0.138898	0.215419
18.7305	0.192813	0.185258	0.145951	0.196883
18.7988	0.176698	0.201075	0.135446	0.203887
18.8672	0.181562	0.181373	0.131802	0.202189
18.9355	0.217146	0.184013	0.126484	0.223559
19.0039	0.207959	0.222326	0.0870044	0.204465
19.0723	0.206923	0.233191	0.111373	0.219922
19.1406	0.216416	0.224266	0.1193	0.2219
19.209	0.184094	0.231939	0.139839	0.166104
19.2773	0.189992	0.235775	0.126222	0.148602
19.3457	0.184722	0.232677	0.130003	0.15273
19.4141	0.184002	0.225022	0.153492	0.144333
19.4824	0.15934	0.215695	0.152004	0.131307
19.5508	0.177131	0.175249	0.146606	0.151878
19.6191	0.231315	0.140946	0.170659	0.171252
19.6875	0.219978	0.214375	0.184015	0.180165
19.7559	0.211275	0.192677	0.241658	0.182539
19.8242	0.217495	0.18343	0.208085	0.164406
19.8926	0.220202	0.196452	0.233489	0.164226
19.9609	0.214851	0.174357	0.228648	0.177849
20.0293	0.206471	0.135263	0.21639	0.162269
20.0977	0.185155	0.156099	0.234456	0.205182
20.166	0.220431	0.175027	0.237517	0.210668
20.2344	0.222263	0.159551	0.212243	0.21536
20.3027	0.216832	0.157326	0.206522	0.206157
20.3711	0.228798	0.177215	0.188921	0.193769
20.4395	0.231746	0.16868	0.166045	0.180977
20.5078	0.216821	0.167738	0.147954	0.198914
20.5762	0.215301	0.171574	0.151419	0.198735
20.6445	0.213062	0.167757	0.1528	0.203743
20.7129	0.203001	0.161621	0.143733	0.223595
20.7812	0.199243	0.179427	0.171133	0.213599
20.8496	0.224379	0.174413	0.161346	0.189162
20.918	0.219271	0.156787	0.145493	0.177009
20.9863	0.200912	0.172436	0.153661	0.158479
21.0547	0.204895	0.207087	0.152966	0.191018
21.123	0.195157	0.207174	0.134801	0.216137
21.1914	0.192118	0.204472	0.153505	0.203346
21.2598	0.190517	0.226343	0.154726	0.228943
21.3281	0.212461	0.216538	0.145343	0.235631
21.3965	0.194263	0.209368	0.133877	0.246781
21.4648	0.17288	0.248723	0.159603	0.227048
21.5332	0.200798	0.252478	0.154601	0.231103
21.6016	0.205346	0.221205	0.161016	0.265798
21.6699	0.201514	0.205501	0.209958	0.256917
21.7383	0.214118	0.230886	0.211581	0.241814
21.8066	0.2205	0.218205	0.200115	0.244349
21.875	0.208524	0.19939	0.203976	0.22334
21.9434	0.211714	0.216793	0.176397	0.251887
22.0117	0.218809	0.212659	0.152722	0.207097
22.0801	0.195101	0.196303	0.153391	0.210506
22.1484	0.183535	0.201503	0.154296	0.188785
22.2168	0.200923	0.222501	0.1797	0.220523
22.2852	0.191024	0.236638	0.158423	0.195845
22.3535	0.204744	0.243027	0.17186	0.13685
22.4219	0.210406	0.259879	0.180109	0.159262
22.4902	0.193089	0.244329	0.155472	0.177589
22.5586	0.213192	0.235559	0.158373	0.1719
22.627	0.216859	0.257995	0.16806	0.186564
22.6953	0.219492	0.2359	0.186918	0.232514
22.7637	0.229307	0.211413	0.185834	0.241917
22.832	0.247099	0.243263	0.244036	0.280919
22.9004	0.229613	0.235293	0.208225	0.25065
22.9688	0.186835	0.249188	0.245529	0.233713
23.0371	0.202873	0.273384	0.262473	0.241356
23.1055	0.158819	0.261503	0.224115	0.227287
23.1738	0.136072	0.254883	0.216883	0.200694
23.2422	0.143173	0.270781	0.166074	0.188306
23.3105	0.140537	0.245091	0.190604	0.201774
23.3789	0.144762	0.178151	0.17635	0.178769
23.4473	0.15234	0.204175	0.196324	0.172838
23.5156	0.160153	0.200438	0.219255	0.200995
23.584	0.158156	0.199167	0.207789	0.192437
23.6523	0.15081	0.212108	0.213881	0.176292
23.7207	0.145937	0.202223	0.217185	0.204362
23.7891	0.157748	0.195052	0.193032	0.179764
23.8574	0.164923	0.205836	0.25331	0.181339
23.9258	0.142975	0.195709	0.231476	0.196964
23.9941	0.135549	0.180878	0.214742	0.233494
24.0625	0.125649	0.18464	0.224664	0.208654
24.1309	0.108883	0.198696	0.220623	0.209591
24.1992	0.113672	0.171811	0.206765	0.21636
24.2676	0.131544	0.143965	0.202328	0.176509
24.3359	0.173042	0.173906	0.223182	0.157502
24.4043	0.189073	0.15931	0.18076	0.181741
24.4727	0.172152	0.136093	0.191004	0.170153
24.541	0.184124	0.149673	0.22087	0.152893
24.6094	0.219225	0.144975	0.196798	0.178967
24.6777	0.205738	0.17204	0.210315	0.178788
24.7461	0.194159	0.152741	0.213054	0.164088
24.8145	0.207401	0.171346	0.189547	0.16407
24.8828	0.200297	0.191947	0.203615	0.184231
24.9512	0.212424	0.186047	0.23389	0.200179
25.0195	0.190235	0.17473	0.229768	0.187226
25.0879	0.198767	0.191494	0.226762	0.229984
25.1562	0.199404	0.186958	0.272204	0.22621
25.2246	0.187831	0.167336	0.262814	0.240801
25.293	0.208895	0.171414	0.251906	0.272143
25.3613	0.210009	0.169035	0.249222	0.272044
25.4297	0.200902	0.154278	0.214775	0.260052
25.498	0.205611	0.156763	0.209296	0.266015
25.5664	0.210394	0.129562	0.20453	0.247801
25.6348	0.184771	0.104269	0.213182	0.231898
25.7031	0.183815	0.0835316	0.195648	0.244171
25.7715	0.187798	0.114669	0.169829	0.256362
25.8398	0.17886	0.129202	0.171614	0.233034
25.9082	0.218355	0.133125	0.190466	0.22025
25.9766	0.23184	0.158988	0.167759	0.227173
26.0449	0.220825	0.16355	0.151025	0.189882
26.1133	0.235821	0.149277	0.13892	0.186989
26.1816	0.248513	0.15535	0.11708	0.208198
26.25	0.243801	0.175635	0.102583	0.195326
26.3184	0.241004	0.165824	0.135654	0.188924
26.3867	0.256558	0.149717	0.139192	0.2237
26.4551	0.242828	0.188272	0.136347	0.205083
26.5234	0.23772	0.183897	0.161597	0.244488
26.5918	0.242664	0.217655	0.155157	0.199537
26.6602	0.256625	0.212325	0.139464	0.182277
26.7285	0.225815	0.20627	0.164552	0.197822
26.7969	0.220303	0.235485	0.176154	0.155109
26.8652	0.215907	0.226635	0.167483	0.138171
26.9336	0.213675	0.184994	0.153383	0.15004
27.002	0.212632	0.198969	0.17065	0.142524
27.0703	0.189004	0.200017	0.162302	0.132044
27.1387	0.226672	0.181517	0.154505	0.155175
27.207	0.201446	0.201399	0.185338	0.157784
27.2754	0.177026	0.206518	0.180101	0.142043
27.3438	0.187076	0.186574	0.171672	0.147609
27.4121	0.178857	0.194166	0.19715	0.179186
27.4805	0.198476	0.20583	0.200769	0.173739
27.5488	0.205019	0.186444	0.222423	0.167822
27.6172	0.241007	0.192121	0.22062	0.205225
27.6855	0.232546	0.227243	0.202609	0.185969
27.7539	0.223124	0.199806	0.209823	0.153637
27.8223	0.24746	0.170448	0.219664	0.167663
27.8906	0.244025	0.153299	0.185063	0.157109
27.959	0.224154	0.137588	0.17687	0.130986
28.0273	0.221431	0.131049	0.198282	0.152041
28.0957	0.222229	0.159552	0.189208	0.174836
28.1641	0.215602	0.160439	0.190912	0.180167
28.2324	0.212563	0.146488	0.223022	0.224437
28.3008	0.240494	0.156788	0.211563	0.192334
28.3691	0.220536	0.15752	0.196186	0.180342
28.4375	0.227159	0.135183	0.208346	0.183119
28.5059	0.250696	0.144529	0.184839	0.159718
28.5742	0.236967	0.169921	0.146239	0.150286
28.6426	0.223553	0.165385	0.173081	0.181944
28.7109	0.209743	0.214476	0.162092	0.181919
28.7793	0.179416	0.191663	0.162043	0.167784
28.8477	0.174066	0.230131	0.137487	0.189464
28.916	0.154914	0.26749	0.151481	0.210511
28.9844	0.153629	0.253694	0.161968	0.191182
29.0527	0.175573	0.251234	0.147632	0.203212
29.1211	0.189293	0.232728	0.190587	0.193055
29.1895	0.123131	0.244789	0.197002	0.176433
29.2578	0.116343	0.221337	0.184582	0.193731
29.3262	0.137172	0.199565	0.199927	0.202335
29.3945	0.137405	0.208676	0.201154	0.201033
29.4629	0.145461	0.200067	0.208448	0.19982
29.5312	0.196608	0.189382	0.241035	0.177688
29.5996	0.206101	0.196094	0.255191	0.188207
29.668	0.184556	0.205601	0.208367	0.173184
29.7363	0.213442	0.186618	0.229705	0.16519
29.8047	0.21639	0.196448	0.210821	0.164689
29.873	0.199308	0.218554	0.199436	0.169455
29.9414	0.187809	0.204684	0.221009	0.146773
30.0098	0.206319	0.194564	0.222559	0.123848
30.0781	0.182222	0.203513	0.195531	0.139312
30.1465	0.207351	0.18285	0.168032	0.142641
30.2148	0.222751	0.165466	0.178115	0.145418
30.2832	0.254989	0.210163	0.17144	0.174758
30.3516	0.241979	0.195251	0.174421	0.167799
30.4199	0.224096	0.171242	0.175883	0.145835
30.4883	0.220661	0.199422	0.153088	0.16736
30.5566	0.182278	0.197197	0.168521	0.159844
30.625	0.136382	0.171353	0.177966	0.140427
30.6934	0.150505	0.173758	0.159632	0.153499
30.7617	0.197419	0.203612	0.1856	0.145337
30.8301	0.183938	0.184232	0.177407	0.171565
30.8984	0.186557	0.15439	0.163549	0.151362
30.9668	0.209617	0.142113	0.181373	0.145754
31.0352	0.193892	0.0993492	0.19792	0.168562
31.1035	0.192533	0.1051	0.187409	0.170769
31.1719	0.200191	0.126581	0.186405	0.160537
31.2402	0.224366	0.165459	0.217238	0.178232
31.3086	0.21319	0.146873	0.218304	0.180203
31.377	0.198023	0.171861	0.21091	0.157131
31.4453	0.2072	0.148813	0.237751	0.157348
31.5137	0.196743	0.120489	0.232434	0.164829
31.582	0.217484	0.164474	0.2157	0.16074
31.6504	0.196652	0.173182	0.235123	0.156173
31.7188	0.160426	0.175351	0.219585	0.171227
31.7871	0.175503	0.190281	0.20054	0.142645
31.8555	0.135756	0.190455	0.194819	0.111341
31.9238	0.10383	0.190064	0.192458	0.119541
31.9922	0.124014	0.206996	0.169589	0.111695
32.0605	0.107489	0.222081	0.159399	0.0964311
32.1289	0.115631	0.204939	0.161184	0.150841
32.1973	0.125124	0.173746	0.156182	0.151784
32.2656	0.115225	0.173759	0.17959	0.181366
32.334	0.154008	0.134657	0.217123	0.183579
32.4023	0.163501	0.121661	0.204387	0.212213
32.4707	0.17794	0.136436	0.212555	0.220971
32.5391	0.170197	0.161505	0.236763	0.204107
32.6074	0.191893	0.156888	0.224181	0.192834
32.6758	0.194599	0.150994	0.226121	0.186749
32.7441	0.19707	0.185001	0.255523	0.17731
32.8125	0.181594	0.17695	0.234643	0.171225
32.8809	0.188688	0.176486	0.205377	0.193476
32.9492	0.165625	0.201394	0.209634	0.189944
33.0176	0.172162	0.199968	0.190273	0.176594
33.0859	0.173121	0.169092	0.176899	0.175535
33.1543	0.153801	0.167982	0.196551	0.181262
33.2227	0.174146	0.190102	0.203207	0.210374
33.291	0.160336	0.183166	0.224223	0.230629
33.3594	0.124976	0.174081	0.2284	0.213846
33.4277	0.131116	0.177527	0.220287	0.190679
33.4961	0.120344	0.15423	0.227656	0.162339
33.5645	0.0702953	0.144667	0.240218	0.11132
33.6328	0.0755618	0.174601	0.236171	0.145061
33.7012	0.0660589	0.164716	0.230376	0.152858
33.7695	0.0702839	0.129371	0.213884	0.121716
33.8379	0.092947	0.143427	0.212477	0.170374
33.9062	0.145142	0.140006	0.236926	0.180005
33.9746	0.147049	0.12701	0.224022	0.159406
34.043	0.139784	0.170356	0.194521	0.168244
34.1113	0.182081	0.169885	0.197502	0.162475
34.1797	0.198589	0.178438	0.137441	0.180089
34.248	0.378107	0.338972	0.611253	0.399193
34.3164	0.375513	0.325668	0.637442	0.368039
34.3848	0.433386	0.312665	0.60708	0.377225
34.4531	0.38703	0.342959	0.544238	0.40443
34.5215	0.428828	0.352166	0.513794	0.386448
34.5898	0.414266	0.372026	0.452431	0.401741
34.6582	0.448889	0.331446	0.393068	0.380035
34.7266	0.414993	0.318908	0.336087	0.390042

## Sheet: Fig 1n
Distance (um)	Roughness (um)	Roughness (um)	Roughness (um)	Roughness (um)
0	0.169977	0.206051	1.14413	0.355482
0.068413	0.161554	0.249086	1.13785	0.302635
0.136826	0.213236	0.31131	1.11915	0.296197
0.205239	0.192348	0.287104	1.15879	0.328926
0.273652	0.243626	0.224708	1.13107	0.31797
0.342065	0.227843	0.165196	1.17356	0.333323
0.410478	0.213005	0.118199	1.21999	0.388521
0.478891	0.242983	0.0829574	1.19391	0.318404
0.547304	0.212632	0.077704	1.25744	0.337572
0.615717	0.204445	0.139462	1.2209	0.269193
0.68413	0.263446	0.210032	1.2258	0.315143
0.752543	0.222524	0.20191	1.27016	0.277402
0.820956	0.267685	0.180797	1.27195	0.256937
0.889369	0.234065	0.15901	1.2572	0.262681
0.957782	0.240359	0.10946	1.24967	0.239578
1.02619	0.25021	0.0894852	1.33201	0.211961
1.09461	0.282423	0.126009	1.27375	0.225475
1.16302	0.185697	0.157576	1.28325	0.19208
1.23143	0.243185	0.171597	1.28382	0.173734
1.29985	0.22971	0.159071	1.20786	0.182627
1.36826	0.216757	0.141809	1.29679	0.19033
1.43667	0.186513	0.222338	1.21452	0.191852
1.50509	0.241633	0.274262	1.13379	0.237131
1.5735	0.212908	0.229524	1.1057	0.179628
1.64191	0.264904	0.180938	1.10249	0.195381
1.71032	0.22797	0.170623	1.1825	0.18225
1.77874	0.22926	0.232153	1.10318	0.23054
1.84715	0.297989	0.248089	1.06271	0.210475
1.91556	0.25206	0.194935	1.02836	0.165501
1.98398	0.209483	0.151694	1.01166	0.174679
2.05239	0.290482	0.172871	1.0125	0.200027
2.1208	0.200298	0.18614	0.9965	0.208787
2.18922	0.207417	0.144252	0.888163	0.182806
2.25763	0.219529	0.159975	0.78531	0.252196
2.32604	0.270405	0.204076	0.687626	0.176755
2.39445	0.195148	0.187032	0.594406	0.189477
2.46287	0.26656	0.159824	0.505628	0.197952
2.53128	0.192175	0.178125	0.421098	0.200222
2.59969	0.260126	0.194666	0.339546	0.229748
2.66811	0.172303	0.188645	0.27098	0.305458
2.73652	0.275944	0.161519	0.237823	0.239182
2.80493	0.199552	0.183871	0.205852	0.25905
2.87335	0.146765	0.256364	0.226068	0.220066
2.94176	0.20215	0.255583	0.251457	0.269719
3.01017	0.168734	0.196533	0.30781	0.288856
3.07858	0.231709	0.160552	0.300392	0.273991
3.147	0.191049	0.207669	0.265863	0.262514
3.21541	0.204339	0.216327	0.216401	0.313188
3.28382	0.174598	0.210097	0.268105	0.345844
3.35224	0.296731	0.233633	0.308966	0.322937
3.42065	0.215125	0.205156	0.275617	0.342204
3.48906	0.227793	0.175225	0.349379	0.342563
3.55748	0.228204	0.212563	0.333649	0.435027
3.62589	0.29739	0.216781	0.269089	0.419596
3.6943	0.26254	0.210983	0.310255	0.502122
3.76271	0.203313	0.228855	0.290189	0.533722
3.83113	0.271483	0.211384	0.238906	0.578929
3.89954	0.183448	0.198434	0.193365	0.679507
3.96795	0.177041	0.1927	0.235212	0.780819
4.03637	0.159772	0.20167	0.22944	0.854044
4.10478	0.158071	0.194948	0.163171	0.919151
4.17319	0.128843	0.264654	0.123643	0.967167
4.24161	0.182039	0.307126	0.255358	0.972959
4.31002	0.198	0.262694	0.192784	0.995628
4.37843	0.174501	0.217338	0.127164	1.03221
4.44684	0.241075	0.182636	0.0872439	1.04572
4.51526	0.200406	0.178517	0.116625	1.02209
4.58367	0.130592	0.252721	0.154235	0.993677
4.65208	0.140243	0.300072	0.161377	0.922265
4.7205	0.231661	0.271347	0.11884	0.94858
4.78891	0.138124	0.222604	0.112275	0.846926
4.85732	0.223399	0.187658	0.178641	0.915771
4.92574	0.150193	0.191478	0.167936	0.797947
4.99415	0.195762	0.203035	0.147692	0.794509
5.06256	0.147909	0.24753	0.0929324	0.779971
5.13097	0.200544	0.276634	0.0527307	0.644597
5.19939	0.175926	0.240985	0.0346781	0.630766
5.2678	0.174572	0.210704	0.05772	0.571622
5.33621	0.240795	0.269653	0.0734081	0.442894
5.40463	0.161208	0.318235	0.119751	0.323207
5.47304	0.195605	0.291245	0.0510089	0.262972
5.54145	0.157259	0.256305	0.0575271	0.261728
5.60987	0.206025	0.309463	0.136717	0.188884
5.67828	0.142181	0.335041	0.0884333	0.240672
5.74669	0.179231	0.303359	0.199872	0.183296
5.8151	0.187432	0.260658	0.169974	0.204775
5.88352	0.153881	0.251702	0.096742	0.232589
5.95193	0.227708	0.250618	0.107742	0.219704
6.02034	0.160008	0.236884	0.175218	0.206401
6.08876	0.269304	0.251133	0.117381	0.235704
6.15717	0.174142	0.332249	0.110123	0.200662
6.22558	0.162162	0.340345	0.182741	0.265949
6.294	0.241381	0.281784	0.156611	0.196768
6.36241	0.211904	0.252776	0.126513	0.184708
6.43082	0.249658	0.287759	0.187267	0.212028
6.49923	0.225127	0.304424	0.154534	0.250637
6.56765	0.313955	0.275238	0.0976093	0.218838
6.63606	0.252016	0.247751	0.114185	0.266391
6.70447	0.301859	0.250393	0.136391	0.194577
6.77289	0.361592	0.289697	0.285822	0.147485
6.8413	0.33732	0.277948	0.206375	0.183155
6.90971	0.258912	0.246628	0.146463	0.197314
6.97813	0.311368	0.308118	0.185716	0.17867
7.04654	0.271593	0.353998	0.294263	0.176097
7.11495	0.270435	0.329418	0.23441	0.144976
7.18336	0.298544	0.278793	0.164875	0.195216
7.25178	0.321696	0.226065	0.108624	0.157357
7.32019	0.270197	0.282637	0.13108	0.146901
7.3886	0.330353	0.32179	0.163353	0.168883
7.45702	0.36751	0.285401	0.123211	0.0981617
7.52543	0.275574	0.262964	0.232608	0.171796
7.59384	0.400579	0.291016	0.196912	0.105088
7.66225	0.305551	0.293992	0.163452	0.13884
7.73067	0.320428	0.269146	0.124717	0.160946
7.79908	0.42579	0.248628	0.164033	0.120731
7.86749	0.319889	0.239482	0.137305	0.167956
7.93591	0.308067	0.215727	0.188458	0.167776
8.00432	0.473002	0.259479	0.137642	0.134469
8.07273	0.388208	0.2678	0.147089	0.162592
8.14115	0.371954	0.278094	0.164428	0.141569
8.20956	0.409136	0.350233	0.145679	0.160796
8.27797	0.334155	0.341613	0.16528	0.11105
8.34638	0.386404	0.27776	0.177762	0.179101
8.4148	0.343852	0.248651	0.166394	0.129
8.48321	0.42492	0.222471	0.184129	0.190474
8.55162	0.499909	0.225806	0.196904	0.192203
8.62004	0.403473	0.294545	0.213046	0.160092
8.68845	0.508137	0.289736	0.238398	0.143953
8.75686	0.404338	0.268263	0.216717	0.143313
8.82528	0.398924	0.318397	0.168575	0.23378
8.89369	0.411952	0.314007	0.186005	0.170279
8.9621	0.426956	0.292775	0.193907	0.187107
9.03051	0.494985	0.350595	0.196031	0.169658
9.09893	0.492882	0.350246	0.191116	0.150573
9.16734	0.445211	0.294794	0.175619	0.175771
9.23575	0.447371	0.339183	0.227406	0.140553
9.30417	0.457263	0.373016	0.157979	0.171045
9.37258	0.480296	0.332676	0.130736	0.137435
9.44099	0.437512	0.298874	0.14693	0.110925
9.50941	0.434048	0.295969	0.255954	0.156501
9.57782	0.461818	0.398882	0.194626	0.125338
9.64623	0.442865	0.419993	0.136533	0.105122
9.71464	0.484174	0.366842	0.221758	0.135234
9.78306	0.374062	0.333624	0.233246	0.154716
9.85147	0.410841	0.34108	0.162948	0.158614
9.91988	0.367953	0.409971	0.213246	0.129567
9.9883	0.442012	0.39869	0.183855	0.131553
10.0567	0.430453	0.35781	0.177392	0.119467
10.1251	0.425462	0.344822	0.187	0.145243
10.1935	0.383411	0.370922	0.178576	0.117518
10.2619	0.455555	0.462583	0.189132	0.133643
10.3304	0.3854	0.457367	0.198605	0.0809673
10.3988	0.456206	0.395885	0.178639	0.143614
10.4672	0.362049	0.378756	0.292661	0.166205
10.5356	0.368773	0.394485	0.24086	0.206236
10.604	0.351014	0.403388	0.17268	0.206716
10.6724	0.426072	0.430988	0.231402	0.192931
10.7408	0.340227	0.3995	0.263071	0.203434
10.8093	0.382307	0.428372	0.196973	0.219295
10.8777	0.328646	0.477721	0.22079	0.13057
10.9461	0.424866	0.470547	0.198331	0.207102
11.0145	0.32336	0.418311	0.291528	0.154906
11.0829	0.310547	0.409887	0.297431	0.206203
11.1513	0.379465	0.483956	0.226344	0.159616
11.2197	0.297204	0.485113	0.170572	0.222765
11.2881	0.316357	0.429204	0.206719	0.185791
11.3566	0.325722	0.457416	0.205419	0.198075
11.425	0.31381	0.502517	0.204291	0.201143
11.4934	0.355467	0.470593	0.209363	0.192
11.5618	0.348001	0.43432	0.244313	0.222161
11.6302	0.298104	0.455003	0.306246	0.233624
11.6986	0.264717	0.484026	0.243293	0.232968
11.767	0.335327	0.450711	0.251105	0.269071
11.8354	0.238003	0.42305	0.272249	0.291382
11.9039	0.276004	0.470759	0.247757	0.279419
11.9723	0.261967	0.466967	0.245067	0.273711
12.0407	0.260337	0.413094	0.282304	0.2829
12.1091	0.288839	0.365387	0.333413	0.271459
12.1775	0.23015	0.374377	0.32923	0.291794
12.2459	0.312404	0.437392	0.291588	0.274751
12.3143	0.253492	0.469932	0.33586	0.34055
12.3828	0.277523	0.425032	0.35687	0.286328
12.4512	0.252005	0.395629	0.349324	0.303384
12.5196	0.244524	0.395265	0.423178	0.285627
12.588	0.261682	0.392773	0.359549	0.331267
12.6564	0.252718	0.425641	0.415984	0.316878
12.7248	0.277904	0.422546	0.418765	0.35012
12.7932	0.207347	0.430338	0.50958	0.329817
12.8616	0.25122	0.489388	0.537538	0.324084
12.9301	0.247032	0.460979	0.606616	0.31363
12.9985	0.291501	0.405794	0.684018	0.31196
13.0669	0.304011	0.423609	0.672799	0.30794
13.1353	0.32375	0.421776	0.763334	0.381124
13.2037	0.226372	0.381144	0.80216	0.32907
13.2721	0.314447	0.414141	0.839721	0.389
13.3405	0.229922	0.458229	0.935914	0.423971
13.4089	0.257637	0.427109	0.910933	0.470692
13.4774	0.248773	0.412885	1.00851	0.567368
13.5458	0.234334	0.470405	0.997831	0.707115
13.6142	0.222815	0.484518	1.06084	0.7662
13.6826	0.30048	0.450085	1.01301	0.831026
13.751	0.238178	0.425123	1.06435	0.90603
13.8194	0.289771	0.403581	1.01219	0.936575
13.8878	0.245884	0.378862	1.02848	0.983212
13.9563	0.241407	0.407907	0.992031	0.99154
14.0247	0.322692	0.431838	1.02907	1.0544
14.0931	0.25813	0.412695	0.936786	1.12229
14.1615	0.248641	0.364043	1.00635	1.10795
14.2299	0.304471	0.369314	0.927784	1.05795
14.2983	0.225027	0.392438	0.821592	1.05954
14.3667	0.307274	0.371179	0.726285	1.03432
14.4351	0.24802	0.403275	0.63513	0.990764
14.5036	0.32199	0.4128	0.543049	0.997869
14.572	0.284962	0.408338	0.460825	0.912866
14.6404	0.319102	0.394959	0.390904	0.781504
14.7088	0.269307	0.392078	0.359582	0.648133
14.7772	0.324123	0.414748	0.437953	0.514638
14.8456	0.270492	0.382033	0.357268	0.38206
14.914	0.337643	0.367789	0.300209	0.285839
14.9824	0.301516	0.330785	0.238937	0.312564
15.0509	0.41288	0.277674	0.217664	0.322759
15.1193	0.3259	0.258756	0.249848	0.322693
15.1877	0.3072	0.242034	0.186789	0.301829
15.2561	0.392803	0.283218	0.210293	0.308158
15.3245	0.43698	0.253335	0.290671	0.276584
15.3929	0.436925	0.237286	0.258373	0.344933
15.4613	0.44419	0.261092	0.282353	0.284957
15.5297	0.42037	0.312043	0.262048	0.323534
15.5982	0.441768	0.359696	0.194517	0.324656
15.6666	0.452932	0.32268	0.212781	0.341384
15.735	0.442926	0.264888	0.293889	0.378811
15.8034	0.475209	0.256173	0.224363	0.270593
15.8718	0.451917	0.229323	0.203035	0.290394
15.9402	0.584648	0.198287	0.172681	0.29909
16.0086	0.776765	0.219996	0.236263	0.297888
16.0771	0.983319	0.192895	0.188294	0.265036
16.1455	1.08973	0.208599	0.153338	0.194538
16.2139	1.13917	0.297433	0.106599	0.206018
16.2823	1.17533	0.282308	0.223124	0.162165
16.3507	1.23105	0.247955	0.211279	0.228331
16.4191	1.29691	0.232419	0.168409	0.155866
16.4875	1.35527	0.250148	0.328584	0.114064
16.5559	1.35862	0.322232	0.267721	0.187971
16.6244	1.39016	0.339659	0.193598	0.153629
16.6928	1.4416	0.296477	0.124714	0.156577
16.7612	1.50368	0.243111	0.189183	0.120367
16.8296	1.48793	0.276748	0.228954	0.15198
16.898	1.47491	0.301495	0.214717	0.0706869
16.9664	1.49515	0.305194	0.143569	0.102926
17.0348	1.54958	0.316322	0.116637	0.0516441
17.1032	1.47183	0.347506	0.145557	0.125961
17.1717	1.46864	0.320818	0.222545	0.0714826
17.2401	1.47945	0.343247	0.191286	0.084768
17.3085	1.40388	0.424382	0.150864	0.0646779
17.3769	1.47163	0.405912	0.131885	0.121435
17.4453	1.37574	0.364519	0.1367	0.0912273
17.5137	1.38477	0.425894	0.160629	0.126447
17.5821	1.2828	0.440577	0.145778	0.120182
17.6506	1.32769	0.418095	0.176746	0.131126
17.719	1.23678	0.363253	0.168868	0.141443
17.7874	1.27242	0.35557	0.248672	0.09
17.8558	1.14556	0.347855	0.254252	0.0904326
17.9242	1.13415	0.369758	0.193636	0.10596
17.9926	1.04379	0.41629	0.14455	0.0739884
18.061	0.963461	0.568594	0.0766303	0.112651
18.1294	0.823329	0.719007	0.0612921	0.108059
18.1979	0.691965	0.81958	0.0923395	0.12621
18.2663	0.565809	0.948312	0.190509	0.0924597
18.3347	0.443187	0.948317	0.138203	0.13542
18.4031	0.340285	1.04535	0.107219	0.129297
18.4715	0.310504	1.08392	0.0842775	0.141481
18.5399	0.329951	1.1494	0.141843	0.0756078
18.6083	0.365171	1.19009	0.173144	0.102506
18.6767	0.331348	1.26835	0.108994	0.0882295
18.7452	0.352663	1.24554	0.0918182	0.125786
18.8136	0.30184	1.29554	0.0874135	0.126636
18.882	0.36229	1.27476	0.14704	0.131769
18.9504	0.307088	1.3365	0.0993576	0.181922
19.0188	0.319321	1.27121	0.227089	0.191723
19.0872	0.286291	1.26744	0.209509	0.201234
19.1556	0.27534	1.27933	0.178202	0.18188
19.2241	0.32225	1.25965	0.143456	0.149925
19.2925	0.335572	1.27655	0.12204	0.144526
19.3609	0.26224	1.34538	0.249451	0.180216
19.4293	0.353483	1.28511	0.186493	0.192478
19.4977	0.264156	1.3293	0.180265	0.144807
19.5661	0.226713	1.30011	0.114099	0.199789
19.6345	0.346846	1.35408	0.0623993	0.204197
19.7029	0.255491	1.32422	0.176612	0.178391
19.7714	0.261935	1.25351	0.190968	0.153491
19.8398	0.273773	1.23134	0.121285	0.175042
19.9082	0.197866	1.25382	0.137924	0.219949
19.9766	0.229086	1.21959	0.179338	0.20324
20.045	0.222745	1.16016	0.110543	0.215004
20.1134	0.292532	1.20239	0.114708	0.233097
20.1818	0.228701	1.17504	0.1837	0.209231
20.2502	0.184354	1.08547	0.171288	0.21346
20.3187	0.287259	1.00578	0.112813	0.254184
20.3871	0.210756	0.958736	0.248391	0.269959
20.4555	0.236285	0.923616	0.180532	0.236115
20.5239	0.222655	0.924517	0.178757	0.258236
20.5923	0.309188	0.905095	0.247631	0.240278
20.6607	0.242966	0.830487	0.217797	0.27233
20.7291	0.171187	0.748994	0.147399	0.249345
20.7975	0.209692	0.674165	0.167065	0.33282
20.866	0.19356	0.602836	0.214152	0.267087
20.9344	0.269964	0.53559	0.195997	0.312999
21.0028	0.191468	0.525584	0.153847	0.306133
21.0712	0.226199	0.487441	0.188969	0.26295
21.1396	0.211809	0.449365	0.173948	0.30806
21.208	0.251397	0.408656	0.136391	0.338631
21.2764	0.242377	0.382798	0.242651	0.313439
21.3449	0.173772	0.387116	0.200662	0.342722
21.4133	0.206022	0.434534	0.143049	0.319485
21.4817	0.179531	0.445048	0.181747	0.374244
21.5501	0.229336	0.388267	0.276577	0.372594
21.6185	0.176181	0.323672	0.274742	0.400284
21.6869	0.182814	0.315115	0.20214	0.361399
21.7553	0.192199	0.311154	0.190579	0.359364
21.8237	0.202503	0.276018	0.306273	0.363593
21.8922	0.221956	0.348953	0.241639	0.320703
21.9606	0.239967	0.383105	0.217605	0.407194
22.029	0.22253	0.364548	0.149805	0.379507
22.0974	0.235172	0.320725	0.235266	0.414977
22.1658	0.22115	0.271749	0.212496	0.382803
22.2342	0.227429	0.276298	0.149355	0.361591
22.3026	0.188907	0.282592	0.190328	0.347435
22.371	0.200428	0.290561	0.178093	0.380295
22.4395	0.194189	0.32095	0.180537	0.318009
22.5079	0.195133	0.331719	0.187348	0.294913
22.5763	0.174231	0.300246	0.161568	0.362987
22.6447	0.20146	0.280549	0.146631	0.285578
22.7131	0.201306	0.236353	0.187741	0.353767
22.7815	0.194414	0.291176	0.186389	0.332371
22.8499	0.203731	0.32702	0.300963	0.371631
22.9184	0.246654	0.328285	0.252998	0.272412
22.9868	0.209361	0.284045	0.242746	0.35793
23.0552	0.237563	0.267703	0.201702	0.267701
23.1236	0.279078	0.246387	0.221284	0.29523
23.192	0.258854	0.308707	0.203704	0.315312
23.2604	0.20817	0.275984	0.257493	0.289966
23.3288	0.313126	0.231488	0.241619	0.320126
23.3972	0.240555	0.189828	0.331646	0.295087
23.4657	0.280563	0.170542	0.28017	0.281292
23.5341	0.271933	0.143832	0.256399	0.286802
23.6025	0.257925	0.154657	0.368946	0.296379
23.6709	0.290306	0.238571	0.316288	0.268534
23.7393	0.258169	0.199741	0.283717	0.306942
23.8077	0.315774	0.167509	0.241012	0.202274
23.8761	0.257371	0.134795	0.267631	0.255727
23.9445	0.313743	0.14599	0.247845	0.239798
24.013	0.286668	0.217804	0.358934	0.18876
24.0814	0.353612	0.22127	0.284111	0.226601
24.1498	0.274759	0.208372	0.322283	0.175934
24.2182	0.305445	0.177559	0.341699	0.172493
24.2866	0.268748	0.126153	0.265962	0.189414
24.355	0.227442	0.130443	0.327669	0.173205
24.4234	0.291332	0.21468	0.337874	0.189583
24.4919	0.281755	0.197366	0.326733	0.160281
24.5603	0.32879	0.194955	0.294451	0.169936
24.6287	0.252314	0.146866	0.306445	0.178876
24.6971	0.260633	0.117861	0.293761	0.170905
24.7655	0.27764	0.159119	0.330721	0.118455
24.8339	0.238557	0.149766	0.300329	0.185323
24.9023	0.272391	0.130577	0.286736	0.190763
24.9707	0.258926	0.141982	0.33854	0.274577
25.0392	0.236041	0.10774	0.303643	0.18596
25.1076	0.255823	0.0841513	0.385907	0.224617
25.176	0.238173	0.0757147	0.354677	0.178224
25.2444	0.257229	0.17861	0.324768	0.226383
25.3128	0.257463	0.215383	0.328687	0.229012
25.3812	0.293007	0.170899	0.409502	0.21064
25.4496	0.272532	0.126569	0.500857	0.185367
25.518	0.336834	0.118747	0.497952	0.223425
25.5865	0.272014	0.0917995	0.569963	0.18927
25.6549	0.266827	0.0663121	0.542215	0.262776
25.7233	0.263626	0.108793	0.545399	0.211569
25.7917	0.289933	0.10598	0.619952	0.272595
25.8601	0.238952	0.133664	0.668763	0.250633
25.9285	0.291047	0.192077	0.752048	0.193537
25.9969	0.240175	0.246941	0.834998	0.237474
26.0653	0.295589	0.201476	0.916693	0.23515
26.1338	0.249576	0.18057	0.957262	0.192676
26.2022	0.29617	0.14225	1.00646	0.215427
26.2706	0.254222	0.108842	1.02724	0.194217
26.339	0.26024	0.149516	1.1144	0.244306
26.4074	0.259278	0.183209	1.08854	0.250315
26.4758	0.271118	0.216469	1.10783	0.260671
26.5442	0.219017	0.237504	1.14626	0.29788
26.6127	0.223896	0.196872	1.14263	0.320744
26.6811	0.253924	0.171074	1.20876	0.362406
26.7495	0.217657	0.180071	1.17324	0.339593
26.8179	0.246589	0.248463	1.23117	0.389714
26.8863	0.252224	0.198981	1.17955	0.354376
26.9547	0.292701	0.219861	1.23472	0.389917
27.0231	0.271635	0.231926	1.18004	0.343257
27.0915	0.255171	0.228063	1.23504	0.386708
27.16	0.245651	0.202801	1.16269	0.354385
27.2284	0.23389	0.30418	1.1925	0.412306
27.2968	0.255169	0.259563	1.11629	0.372747
27.3652	0.219017	0.26639	1.13272	0.369688
27.4336	0.227992	0.327618	1.07372	0.377077
27.502	0.197712	0.284021	1.0844	0.39301
27.5704	0.230966	0.283215	1.03262	0.43077
27.6388	0.282685	0.258466	0.982976	0.444599
27.7073	0.224846	0.221376	0.931933	0.495538
27.7757	0.226548	0.260429	0.961895	0.426632
27.8441	0.245024	0.265171	0.865354	0.502103
27.9125	0.205995	0.210272	0.768241	0.512463
27.9809	0.284839	0.227784	0.67908	0.638858
28.0493	0.230454	0.243391	0.60015	0.707437
28.1177	0.213945	0.270806	0.512967	0.770104
28.1862	0.236768	0.312427	0.420559	0.798723
28.2546	0.163094	0.300313	0.344401	0.862738
28.323	0.198135	0.257023	0.280988	0.935199
28.3914	0.25345	0.242407	0.217924	0.954015
28.4598	0.218563	0.276112	0.207313	1.01353
28.5282	0.215992	0.298713	0.261543	1.02467
28.5966	0.199687	0.299372	0.226757	1.04236
28.665	0.240431	0.340281	0.22576	1.10922
28.7335	0.209765	0.321329	0.280223	1.09833
28.8019	0.263492	0.389351	0.267339	1.10373
28.8703	0.212803	0.365132	0.283488	1.11171
28.9387	0.266402	0.334321	0.41784	1.10541
29.0071	0.226315	0.279745	0.362524	1.14564
29.0755	0.266543	0.247224	0.279957	1.10142
29.1439	0.241995	0.236277	0.207783	1.14326
29.2123	0.281434	0.41905	0.197759	1.10235
29.2808	0.308179	0.361058	0.200367	1.11266
29.3492	0.252648	0.303461	0.231829	1.08223
29.4176	0.313991	0.268291	0.180688	1.07746
29.486	0.246779	0.238086	0.142219	1.01919
29.5544	0.246755	0.27702	0.135245	1.09027
29.6228	0.271537	0.266804	0.204928	0.981924
29.6912	0.225499	0.307709	0.195587	1.03433
29.7597	0.234365	0.255061	0.138868	0.910395
29.8281	0.271542	0.341698	0.0879601	0.877689
29.8965	0.223498	0.368758	0.104358	0.863673
29.9649	0.255879	0.346318	0.208176	0.732356
30.0333	0.255749	0.318047	0.244192	0.648976
30.1017	0.248544	0.269739	0.185809	0.658107
30.1701	0.275426	0.218533	0.159931	0.554181
30.2385	0.31217	0.209766	0.13519	0.444446
30.307	0.279783	0.257549	0.118998	0.382023
30.3754	0.320104	0.308112	0.0891399	0.472543
30.4438	0.296994	0.262323	0.160194	0.372456
30.5122	0.336492	0.225441	0.108966	0.374615
30.5806	0.286961	0.195223	0.1948	0.386902
30.649	0.295646	0.203883	0.22252	0.401146
30.7174	0.288955	0.236436	0.182029	0.326472
30.7858	0.224756	0.228592	0.125652	0.292005
30.8543	0.273861	0.204121	0.227967	0.323234
30.9227	0.287578	0.237954	0.165967	0.280126
30.9911	0.282518	0.212608	0.12883	0.30081
31.0595	0.278194	0.178611	0.160358	0.369859
31.1279	0.293004	0.18746	0.161165	0.31432
31.1963	0.318296	0.198196	0.130683	0.392302
31.2647	0.298572	0.225958	0.139517	0.301279
31.3331	0.284666	0.191868	0.14671	0.285739
31.4016	0.295544	0.163031	0.186978	0.277298
31.47	0.333067	0.146842	0.145817	0.306914
31.5384	0.276371	0.124664	0.202908	0.301541
31.6068	0.273305	0.116231	0.197246	0.283778
31.6752	0.335966	0.158207	0.176512	0.34098
31.7436	0.295849	0.164635	0.242636	0.296764
31.812	0.277674	0.199408	0.180223	0.283432
31.8805	0.297502	0.157029	0.138974	0.281877
31.9489	0.257798	0.140079	0.16537	0.315139
32.0173	0.269773	0.125186	0.281232	0.323798
32.0857	0.301065	0.18289	0.223445	0.317598
32.1541	0.264111	0.16352	0.18434	0.298352
32.2225	0.287148	0.155562	0.182614	0.329317
32.2909	0.348833	0.169894	0.14456	0.317223
32.3593	0.293125	0.183701	0.263714	0.331111
32.4278	0.304839	0.246248	0.230258	0.240806
32.4962	0.310834	0.252828	0.172895	0.317067
32.5646	0.281092	0.222082	0.272423	0.290161
32.633	0.314588	0.178086	0.278119	0.291143
32.7014	0.271977	0.157332	0.219928	0.294114
32.7698	0.305175	0.215388	0.160248	0.300085
32.8382	0.31967	0.336505	0.201887	0.21121
32.9066	0.380289	0.287432	0.235738	0.283562
32.9751	0.350327	0.25127	0.176632	0.266835
33.0435	0.291019	0.220229	0.240422	0.266647
33.1119	0.329019	0.166971	0.232787	0.315881
33.1803	0.29257	0.155239	0.192066	0.328145
33.2487	0.328587	0.275659	0.277596	0.313202
33.3171	0.309782	0.309484	0.23288	0.322975
33.3855	0.290929	0.247434	0.190785	0.308133
33.454	0.319318	0.197191	0.146071	0.376926
33.5224	0.253982	0.187966	0.177261	0.291172
33.5908	0.284814	0.235814	0.155428	0.351696
33.6592	0.289021	0.1903	0.198341	0.305915
33.7276	0.303643	0.172526	0.139955	0.265403
33.796	0.266444	0.243682	0.2591	0.30134
33.8644	0.27683	0.214868	0.250874	0.338614
33.9328	0.341792	0.307643	0.180796	0.294436
34.0013	0.290424	0.286788	0.185106	0.343933
34.0697	0.334139	0.286686	0.26526	0.298586
34.1381	0.293304	0.24046	0.202494	0.300573
34.2065	0.273337	0.198363	0.181963	0.36036
34.2749	0.312072	0.168738	0.176926	0.300353
34.3433	0.36859	0.186721	0.213533	0.316631
34.4117	0.311095	0.226008	0.238443	0.288739
34.4801	0.276517	0.220211	0.194806	0.305349
34.5486	0.34266	0.17611	0.136577	0.286261
34.617	0.286357	0.157927	0.180373	0.371055
34.6854	0.25575	0.27506	0.243146	0.306573
34.7538	0.269187	0.312924	0.18941	0.376417

## Sheet: Fig 1o
Distance (um)	Roughness (um)	Roughness (um)	Roughness (um)	Roughness (um)
0	0.248759	0.925254	0.243888	0.310663
0.0684396	0.246315	0.915532	0.258667	0.284064
0.136879	0.252571	0.923155	0.224819	0.246248
0.205319	0.267647	0.932908	0.235855	0.229931
0.273759	0.260084	0.940255	0.213939	0.192901
0.342198	0.246349	0.942675	0.225371	0.20309
0.410638	0.247833	0.9614	0.247284	0.20495
0.479077	0.256727	0.970896	0.232554	0.214966
0.547517	0.274478	0.961939	0.220501	0.214487
0.615957	0.269432	0.961257	0.238711	0.208677
0.684396	0.275652	0.965328	0.24445	0.172253
0.752836	0.279365	0.956507	0.225699	0.170623
0.821276	0.285457	0.909096	0.213522	0.145927
0.889715	0.290291	0.892578	0.233595	0.118243
0.958155	0.284846	0.844894	0.234138	0.123765
1.02659	0.284504	0.776321	0.230956	0.114867
1.09503	0.323134	0.731281	0.233817	0.104754
1.16347	0.343615	0.657082	0.228447	0.103119
1.23191	0.351687	0.631027	0.235267	0.0877299
1.30035	0.341912	0.620566	0.21218	0.0886917
1.36879	0.366098	0.579266	0.204088	0.0735415
1.43723	0.381078	0.569989	0.232098	0.079608
1.50567	0.391274	0.532559	0.2954	0.0969625
1.57411	0.413249	0.508645	0.320315	0.0924903
1.64255	0.4467	0.475923	0.330746	0.0686772
1.71099	0.462597	0.458388	0.348715	0.0586377
1.77943	0.494197	0.453983	0.36512	0.0558481
1.84787	0.521214	0.426038	0.350972	0.0453766
1.91631	0.532955	0.406197	0.370359	0.0490011
1.98475	0.555519	0.381186	0.39772	0.0668327
2.05319	0.555639	0.362557	0.438709	0.0454536
2.12163	0.548965	0.358688	0.44391	0.0480406
2.19007	0.554205	0.307979	0.422968	0.0447627
2.25851	0.514436	0.305639	0.44135	0.0447199
2.32695	0.483483	0.30875	0.409411	0.03724
2.39539	0.484484	0.314821	0.400419	0.0616133
2.46383	0.442992	0.287677	0.360126	0.0468216
2.53227	0.408599	0.280485	0.37447	0.0519249
2.60071	0.371728	0.29404	0.386812	0.043116
2.66915	0.332039	0.293747	0.351525	0.0415685
2.73759	0.295305	0.295856	0.352467	0.0538326
2.80603	0.260209	0.297912	0.324827	0.0331856
2.87446	0.265196	0.30261	0.288424	0.052124
2.9429	0.246893	0.295485	0.30401	0.053514
3.01134	0.234967	0.288247	0.257068	0.0470419
3.07978	0.233005	0.270998	0.24435	0.0484509
3.14822	0.244236	0.26914	0.234413	0.0635747
3.21666	0.237971	0.25357	0.244828	0.0504284
3.2851	0.230182	0.249493	0.232024	0.0471687
3.35354	0.235783	0.246348	0.225495	0.050873
3.42198	0.250345	0.220631	0.241759	0.0482929
3.49042	0.249306	0.226559	0.221076	0.0664392
3.55886	0.237973	0.212805	0.219445	0.0617384
3.6273	0.242182	0.212301	0.212023	0.0479072
3.69574	0.252581	0.21993	0.199781	0.0440589
3.76418	0.264302	0.226901	0.2217	0.0606566
3.83262	0.287488	0.23578	0.1842	0.0375296
3.90106	0.294727	0.237563	0.192253	0.0306428
3.9695	0.29422	0.236691	0.191685	0.0556979
4.03794	0.28082	0.217374	0.162977	0.0515128
4.10638	0.282728	0.22846	0.161414	0.049099
4.17482	0.287829	0.2352	0.14166	0.0641972
4.24326	0.294259	0.21386	0.128832	0.0557568
4.3117	0.268032	0.213989	0.124847	0.0678859
4.38014	0.27217	0.21807	0.112708	0.0486665
4.44858	0.275056	0.237855	0.124832	0.0688084
4.51702	0.269813	0.235798	0.0967712	0.0792072
4.58546	0.264762	0.223318	0.0989987	0.0887394
4.6539	0.255466	0.220934	0.114308	0.0635908
4.72234	0.24669	0.215	0.123373	0.0793786
4.79077	0.226769	0.212737	0.112707	0.0771358
4.85921	0.218809	0.231701	0.10339	0.058616
4.92765	0.202567	0.241047	0.128128	0.0560126
4.99609	0.194501	0.230662	0.11392	0.0676751
5.06453	0.183562	0.250883	0.117603	0.0649972
5.13297	0.193027	0.244508	0.121319	0.0760371
5.20141	0.176716	0.24947	0.110652	0.0798007
5.26985	0.172686	0.259898	0.120721	0.0687127
5.33829	0.189212	0.290899	0.122788	0.075032
5.40673	0.189412	0.276718	0.136009	0.0523595
5.47517	0.158208	0.280956	0.133604	0.0733576
5.54361	0.147735	0.278779	0.141471	0.0838304
5.61205	0.160426	0.292111	0.155618	0.0712217
5.68049	0.149039	0.298176	0.166811	0.0641107
5.74893	0.148613	0.319064	0.156789	0.0749744
5.81737	0.172859	0.290188	0.170506	0.0666833
5.88581	0.171679	0.29739	0.15612	0.0724567
5.95425	0.171319	0.317264	0.180517	0.0801816
6.02269	0.199986	0.280248	0.16059	0.0684049
6.09113	0.210594	0.27952	0.175826	0.0728394
6.15957	0.236302	0.279366	0.191097	0.0823577
6.22801	0.234586	0.256319	0.211403	0.095976
6.29645	0.249759	0.236662	0.170586	0.0688123
6.36489	0.252366	0.216831	0.183584	0.0832889
6.43333	0.259815	0.232175	0.205263	0.0924782
6.50177	0.27172	0.218117	0.239184	0.074464
6.57021	0.298724	0.226272	0.237504	0.0876424
6.63865	0.314377	0.239158	0.219011	0.0668556
6.70708	0.318827	0.2287	0.234056	0.101646
6.77552	0.329584	0.221511	0.229665	0.0698369
6.84396	0.337114	0.233622	0.229094	0.073274
6.9124	0.3476	0.256752	0.257841	0.0678097
6.98084	0.35898	0.295617	0.290023	0.0941487
7.04928	0.358807	0.3416	0.304482	0.0768514
7.11772	0.361828	0.372548	0.308742	0.0866602
7.18616	0.362319	0.399648	0.323981	0.0869251
7.2546	0.33653	0.418493	0.359682	0.0882606
7.32304	0.338324	0.416061	0.37947	0.0682512
7.39148	0.319119	0.41422	0.404056	0.0841962
7.45992	0.289344	0.445863	0.400931	0.0860252
7.52836	0.260569	0.440802	0.438234	0.0783033
7.5968	0.242932	0.449235	0.458514	0.0826019
7.66524	0.239868	0.462713	0.45731	0.0944258
7.73368	0.209246	0.48212	0.478465	0.095653
7.80212	0.208146	0.497376	0.458351	0.133277
7.87056	0.193516	0.476606	0.469269	0.115794
7.939	0.204599	0.493301	0.465225	0.133387
8.00744	0.202191	0.485424	0.447583	0.124508
8.07588	0.194941	0.477749	0.465361	0.135029
8.14432	0.196011	0.480197	0.400797	0.134719
8.21276	0.188309	0.467457	0.393201	0.152242
8.2812	0.196083	0.460423	0.373715	0.1341
8.34964	0.207832	0.461635	0.340848	0.125992
8.41808	0.204025	0.491304	0.332992	0.128415
8.48652	0.224962	0.462485	0.3609	0.135065
8.55496	0.238745	0.466006	0.354807	0.136428
8.62339	0.24644	0.458146	0.346665	0.15682
8.69183	0.25355	0.460753	0.321504	0.140254
8.76027	0.255195	0.476927	0.304456	0.127946
8.82871	0.269339	0.489702	0.278148	0.123019
8.89715	0.261915	0.496961	0.286437	0.115335
8.96559	0.272517	0.507056	0.280841	0.115055
9.03403	0.293962	0.523019	0.305318	0.11124
9.10247	0.320054	0.540916	0.293998	0.110066
9.17091	0.348697	0.553911	0.319412	0.086497
9.23935	0.367653	0.562231	0.296084	0.0980594
9.30779	0.384239	0.592765	0.31159	0.108578
9.37623	0.394112	0.606481	0.316374	0.0874294
9.44467	0.403507	0.623885	0.309538	0.0782769
9.51311	0.423181	0.647983	0.321023	0.0781882
9.58155	0.435203	0.669058	0.308714	0.080089
9.64999	0.446618	0.68779	0.304583	0.0847984
9.71843	0.467773	0.691065	0.31232	0.0904246
9.78687	0.469434	0.703131	0.28185	0.0679032
9.85531	0.489996	0.751987	0.301845	0.0822993
9.92375	0.511018	0.779781	0.26483	0.0599506
9.99219	0.519665	0.803877	0.287313	0.0647764
10.0606	0.531011	0.81228	0.251552	0.0828621
10.1291	0.536226	0.812475	0.257351	0.070881
10.1975	0.552458	0.805078	0.248922	0.0586701
10.2659	0.568488	0.806369	0.253816	0.0775211
10.3344	0.586369	0.807394	0.279362	0.0674716
10.4028	0.601755	0.836895	0.25628	0.0834066
10.4713	0.634571	0.845406	0.265755	0.0671742
10.5397	0.648612	0.857308	0.256304	0.0844391
10.6081	0.671853	0.886479	0.266153	0.09177
10.6766	0.689294	0.899659	0.283453	0.0628717
10.745	0.701205	0.913064	0.256196	0.0749129
10.8135	0.719167	0.939075	0.256364	0.0854698
10.8819	0.713548	0.945406	0.24858	0.080015
10.9503	0.709826	0.950232	0.229177	0.0892645
11.0188	0.724933	0.965549	0.245062	0.0636245
11.0872	0.717671	0.947803	0.266469	0.0754666
11.1557	0.73558	0.956142	0.296103	0.0817288
11.2241	0.720127	0.953283	0.299906	0.067427
11.2925	0.734894	0.937836	0.33048	0.0893199
11.361	0.74779	0.947735	0.296143	0.0653587
11.4294	0.686403	0.965662	0.321162	0.0669353
11.4979	0.644742	0.933879	0.323143	0.0843217
11.5663	0.65531	0.941606	0.31617	0.0693274
11.6347	0.633838	0.937771	0.325539	0.066569
11.7032	0.625156	0.947726	0.341689	0.0828192
11.7716	0.589012	0.980875	0.361104	0.0632496
11.8401	0.557105	0.990646	0.355997	0.0776574
11.9085	0.533838	0.95836	0.33564	0.0663578
11.9769	0.52605	0.959478	0.329186	0.071949
12.0454	0.511351	0.957447	0.332466	0.0633683
12.1138	0.475237	0.976629	0.342354	0.0608532
12.1823	0.453282	1.00204	0.322793	0.0632258
12.2507	0.436504	1.01863	0.308243	0.0642583
12.3191	0.421676	0.996439	0.297503	0.0782133
12.3876	0.405722	1.02583	0.302648	0.074758
12.456	0.38721	1.04201	0.296711	0.0742658
12.5245	0.361991	1.06466	0.26311	0.0707373
12.5929	0.349266	1.07912	0.27197	0.0944868
12.6613	0.332161	1.04644	0.24493	0.103688
12.7298	0.35259	1.0131	0.265417	0.0962972
12.7982	0.33911	1.01137	0.204387	0.0996109
12.8667	0.34358	1.04193	0.224235	0.0789236
12.9351	0.366749	0.991208	0.203499	0.0959582
13.0035	0.362415	0.999105	0.205797	0.102038
13.072	0.380839	0.9878	0.220457	0.117819
13.1404	0.354268	0.912772	0.205265	0.116774
13.2089	0.355512	0.954241	0.193275	0.107373
13.2773	0.34085	0.967866	0.21942	0.0981573
13.3457	0.346121	0.934637	0.217744	0.099804
13.4142	0.332782	0.931683	0.238174	0.0976655
13.4826	0.351075	0.933374	0.224883	0.107523
13.551	0.361684	0.89355	0.247367	0.12014
13.6195	0.346222	0.869439	0.241289	0.11005
13.6879	0.335809	0.865102	0.251995	0.124277
13.7564	0.34039	0.855375	0.257415	0.140535
13.8248	0.339672	0.858306	0.277148	0.128405
13.8932	0.305703	0.884547	0.265308	0.152582
13.9617	0.302398	0.850465	0.259024	0.167845
14.0301	0.287424	0.866616	0.263845	0.139285
14.0986	0.282061	0.834387	0.228311	0.155428
14.167	0.291198	0.850195	0.255086	0.149561
14.2354	0.279075	0.779326	0.252447	0.141929
14.3039	0.265986	0.763282	0.260245	0.140772
14.3723	0.264044	0.721928	0.237138	0.139918
14.4408	0.238948	0.697769	0.245856	0.15596
14.5092	0.243135	0.667538	0.232742	0.164448
14.5776	0.248884	0.664528	0.244776	0.15326
14.6461	0.218327	0.614745	0.231382	0.154186
14.7145	0.218231	0.517905	0.257515	0.160109
14.783	0.216778	0.516958	0.239786	0.17149
14.8514	0.230178	0.41267	0.262907	0.183142
14.9198	0.244369	0.356629	0.238536	0.184919
14.9883	0.224483	0.372183	0.24694	0.166086
15.0567	0.240739	0.320088	0.235844	0.184889
15.1252	0.235111	0.321559	0.214536	0.192032
15.1936	0.235049	0.279238	0.173496	0.183568
15.262	0.24326	0.250563	0.170746	0.169763
15.3305	0.228578	0.214902	0.214887	0.184472
15.3989	0.227543	0.208356	0.239364	0.18904
15.4674	0.233084	0.201811	0.512015	0.181019
15.5358	0.233743	0.149124	0.950805	0.170127
15.6042	0.233592	0.162112	1.21334	0.181875
15.6727	0.242142	0.184331	1.34174	0.193248
15.7411	0.251718	0.171974	1.46196	0.192031
15.8096	0.230437	0.207224	1.49512	0.198783
15.878	0.2455	0.163849	1.57374	0.205845
15.9464	0.249085	0.167199	1.59876	0.204494
16.0149	0.245879	0.161877	1.64828	0.18967
16.0833	0.250061	0.159302	1.64316	0.221308
16.1518	0.242002	0.174118	1.63959	0.193719
16.2202	0.226417	0.149401	1.65165	0.196048
16.2886	0.234767	0.138274	1.64283	0.180499
16.3571	0.239725	0.164978	1.65658	0.169683
16.4255	0.242689	0.16962	1.64471	0.179766
16.494	0.213424	0.161884	1.62498	0.193306
16.5624	0.24048	0.190872	1.61403	0.180862
16.6308	0.25421	0.155849	1.61049	0.188369
16.6993	0.219497	0.171091	1.61592	0.192929
16.7677	0.221927	0.20681	1.569	0.185021
16.8362	0.23763	0.200392	1.54109	0.208773
16.9046	0.240057	0.2013	1.48925	0.223252
16.973	0.229438	0.22306	1.46315	0.218077
17.0415	0.228163	0.203802	1.39801	0.211119
17.1099	0.225745	0.201833	1.36599	0.242976
17.1784	0.240886	0.188507	1.33413	0.225572
17.2468	0.272524	0.21291	1.28297	0.250754
17.3152	0.284632	0.223694	1.22042	0.257093
17.3837	0.291278	0.220782	1.17503	0.240876
17.4521	0.316534	0.209529	1.11611	0.225599
17.5205	0.332137	0.212169	1.07833	0.231524
17.589	0.338734	0.208941	1.05678	0.226038
17.6574	0.387421	0.230392	1.01505	0.208814
17.7259	0.419513	0.235238	0.953014	0.220104
17.7943	0.43051	0.262233	0.896411	0.225163
17.8627	0.431293	0.285243	0.855811	0.223039
17.9312	0.455731	0.355795	0.772285	0.229245
17.9996	0.454266	0.438336	0.757721	0.211913
18.0681	0.48547	0.477613	0.69181	0.215603
18.1365	0.508238	0.521643	0.647177	0.226024
18.2049	0.549516	0.588205	0.594709	0.220608
18.2734	0.586933	0.630699	0.550141	0.21423
18.3418	0.609837	0.636703	0.500846	0.187628
18.4103	0.651538	0.641731	0.441767	0.179788
18.4787	0.689452	0.653417	0.409185	0.17317
18.5471	0.709841	0.688075	0.358678	0.169591
18.6156	0.757621	0.701959	0.315761	0.17176
18.684	0.777874	0.731385	0.274336	0.165886
18.7525	0.852148	0.731023	0.280048	0.155293
18.8209	0.9539	0.706816	0.215637	0.169417
18.8893	0.994118	0.703679	0.173668	0.177225
18.9578	0.995491	0.700842	0.127455	0.1884
19.0262	0.957503	0.695134	0.120874	0.187891
19.0947	0.881038	0.673876	0.155166	0.186253
19.1631	0.884086	0.668793	0.14321	0.175069
19.2315	0.827737	0.67157	0.111201	0.162039
19.3	0.823535	0.629456	0.118895	0.178148
19.3684	0.766259	0.622189	0.0928615	0.168833
19.4369	0.735904	0.600129	0.119836	0.183276
19.5053	0.6953	0.611785	0.113631	0.195197
19.5737	0.610029	0.605989	0.113089	0.196274
19.6422	0.523479	0.597149	0.122023	0.179218
19.7106	0.45221	0.577491	0.134196	0.16483
19.7791	0.452142	0.577593	0.145548	0.159417
19.8475	0.413854	0.571711	0.115471	0.156293
19.9159	0.401716	0.582459	0.122049	0.174457
19.9844	0.408649	0.57946	0.12059	0.17237
20.0528	0.375989	0.584458	0.136196	0.170094
20.1213	0.369105	0.59928	0.151292	0.16457
20.1897	0.379525	0.582305	0.164067	0.178945
20.2581	0.356794	0.56403	0.175025	0.189811
20.3266	0.340026	0.551522	0.183707	0.21626
20.395	0.296439	0.544947	0.190807	0.235916
20.4635	0.282329	0.547804	0.218371	0.268419
20.5319	0.288087	0.513827	0.248872	0.323787
20.6003	0.269113	0.504585	0.245101	0.742221
20.6688	0.281148	0.493738	0.266095	1.27096
20.7372	0.287836	0.502193	0.268308	1.46995
20.8057	0.289318	0.464839	0.277006	1.53862
20.8741	0.269769	0.47499	0.31672	1.58876
20.9425	0.283625	0.434301	0.326557	1.63959
21.011	0.264432	0.402239	0.351595	1.702
21.0794	0.244353	0.403576	0.355693	1.70946
21.1478	0.245976	0.395372	0.368717	1.71763
21.2163	0.258156	0.393583	0.364837	1.7071
21.2847	0.259511	0.356971	0.372115	1.71952
21.3532	0.259387	0.335648	0.399121	1.7198
21.4216	0.249736	0.29714	0.396889	1.69989
21.49	0.24812	0.284932	0.413451	1.68637
21.5585	0.265068	0.254626	0.41335	1.67198
21.6269	0.250818	0.223141	0.434052	1.66077
21.6954	0.253986	0.216088	0.435555	1.64773
21.7638	0.245521	0.216584	0.430994	1.62729
21.8322	0.272749	0.191892	0.435772	1.6083
21.9007	0.261126	0.198284	0.422258	1.51417
21.9691	0.274786	0.201101	0.427907	1.45473
22.0376	0.26685	0.191658	0.426758	1.3818
22.106	0.272683	0.203694	0.398629	1.34351
22.1744	0.269641	0.196892	0.410055	1.24293
22.2429	0.270078	0.186821	0.39342	1.17544
22.3113	0.288842	0.195052	0.398051	1.10925
22.3798	0.279449	0.188511	0.374069	1.05296
22.4482	0.264408	0.200282	0.379818	0.993176
22.5166	0.270598	0.214244	0.35779	0.909823
22.5851	0.246734	0.224061	0.347374	0.851331
22.6535	0.265926	0.179508	0.328769	0.795323
22.722	0.267	0.179321	0.306833	0.734235
22.7904	0.241914	0.204211	0.286045	0.660391
22.8588	0.246176	0.224134	0.267403	0.599008
22.9273	0.247328	0.194577	0.277821	0.536072
22.9957	0.24009	0.183372	0.289556	0.453303
23.0642	0.253862	0.194846	0.242801	0.386034
23.1326	0.237027	0.201944	0.273245	0.306291
23.201	0.226011	0.180244	0.288353	0.242434
23.2695	0.215092	0.195468	0.284436	0.190357
23.3379	0.226066	0.193031	0.271684	0.140488
23.4064	0.225062	0.197005	0.264033	0.123055
23.4748	0.225244	0.185228	0.280285	0.128934
23.5432	0.208624	0.173348	0.307106	0.153997
23.6117	0.212339	0.183981	0.304384	0.150769
23.6801	0.210501	0.185727	0.328715	0.147739
23.7486	0.21843	0.183214	0.347081	0.172923
23.817	0.211194	0.197656	0.330762	0.156987
23.8854	0.210394	0.182774	0.336172	0.147815
23.9539	0.193251	0.181731	0.330723	0.1579
24.0223	0.209124	0.159518	0.331222	0.182737
24.0908	0.232593	0.164853	0.282682	0.17038
24.1592	0.197808	0.156725	0.299066	0.166133
24.2276	0.181416	0.161678	0.289358	0.17772
24.2961	0.21669	0.154568	0.248705	0.182854
24.3645	0.184428	0.161225	0.27055	0.174701
24.433	0.200483	0.155535	0.244886	0.183337
24.5014	0.196612	0.169923	0.265571	0.186925
24.5698	0.194734	0.184265	0.222878	0.180321
24.6383	0.219479	0.15184	0.236677	0.188309
24.7067	0.20474	0.175122	0.245063	0.2
24.7752	0.201666	0.195058	0.212233	0.214863
24.8436	0.198932	0.166708	0.217131	0.216141
24.912	0.197393	0.142279	0.211138	0.233417
24.9805	0.198327	0.151392	0.187773	0.260168
25.0489	0.213752	0.163668	0.172517	0.267202
25.1173	0.221162	0.169062	0.192019	0.27563
25.1858	0.228697	0.167139	0.152817	0.283083
25.2542	0.217473	0.16828	0.165555	0.296307
25.3227	0.210285	0.181818	0.175681	0.31515
25.3911	0.218603	0.152744	0.139554	0.322875
25.4595	0.223549	0.142329	0.148375	0.327919
25.528	0.225176	0.155236	0.152377	0.357581
25.5964	0.22617	0.132731	0.151133	0.314728
25.6649	0.235091	0.175135	0.112314	0.283604
25.7333	0.210446	0.160617	0.11495	0.259082
25.8017	0.224504	0.168907	0.128603	0.26669
25.8702	0.229794	0.153374	0.103944	0.239425
25.9386	0.234279	0.189789	0.101358	0.232026
26.0071	0.220573	0.174648	0.115988	0.235042
26.0755	0.232974	0.179037	0.11223	0.264458
26.1439	0.227973	0.155212	0.123131	0.265725
26.2124	0.22513	0.160157	0.106445	0.272498
26.2808	0.234944	0.18478	0.123697	0.283416
26.3493	0.231268	0.179464	0.132902	0.281889
26.4177	0.243199	0.184011	0.129042	0.279438
26.4861	0.239847	0.183939	0.14872	0.27633
26.5546	0.229495	0.17486	0.128618	0.271772
26.623	0.21674	0.196023	0.15139	0.281524
26.6915	0.235796	0.181902	0.15004	0.323986
26.7599	0.228081	0.184525	0.197554	0.400049
26.8283	0.210933	0.180463	0.13751	0.436173
26.8968	0.215362	0.189497	0.162953	0.477514
26.9652	0.224624	0.191624	0.146664	0.495103
27.0337	0.220063	0.192791	0.140795	0.522463
27.1021	0.196561	0.18645	0.166537	0.54075
27.1705	0.202411	0.202178	0.155853	0.552505
27.239	0.208433	0.209246	0.125267	0.576456
27.3074	0.207226	0.200326	0.15884	0.604431
27.3759	0.211561	0.197925	0.158538	0.64712
27.4443	0.193514	0.203449	0.14068	0.669945
27.5127	0.192239	0.217885	0.157994	0.623876
27.5812	0.198343	0.216761	0.128389	0.637238
27.6496	0.197366	0.220552	0.132643	0.648467
27.7181	0.18483	0.238729	0.131681	0.681266
27.7865	0.192608	0.246549	0.143506	0.699483
27.8549	0.203058	0.238455	0.130227	0.703545
27.9234	0.211037	0.240004	0.149422	0.706173
27.9918	0.218942	0.217316	0.121711	0.725006
28.0603	0.226002	0.225402	0.113741	0.736941
28.1287	0.239315	0.217694	0.129971	0.730558
28.1971	0.238771	0.233958	0.143048	0.716961
28.2656	0.222066	0.243545	0.126681	0.678162
28.334	0.224818	0.212078	0.124117	0.625257
28.4025	0.22662	0.21961	0.15033	0.563721
28.4709	0.233977	0.193143	0.135749	0.527496
28.5393	0.227284	0.222823	0.126754	0.52286
28.6078	0.244956	0.222562	0.129756	0.491274
28.6762	0.277058	0.209575	0.129996	0.543587
28.7446	0.288757	0.200815	0.15081	0.489192
28.8131	0.284092	0.216363	0.136967	0.380453
28.8815	0.280981	0.226042	0.140304	0.291501
28.95	0.294863	0.220906	0.166871	0.301022
29.0184	0.321876	0.231771	0.14675	0.275941
29.0868	0.340889	0.222036	0.152349	0.286798
29.1553	0.362343	0.240649	0.165567	0.271098
29.2237	0.363169	0.245994	0.180024	0.244478
29.2922	0.389985	0.231748	0.146978	0.240249
29.3606	0.426682	0.224611	0.151488	0.242635
29.429	0.451817	0.244226	0.162704	0.214655
29.4975	0.478218	0.255814	0.17743	0.207939
29.5659	0.502384	0.266432	0.161662	0.202182
29.6344	0.51177	0.254756	0.194695	0.194628
29.7028	0.541758	0.268043	0.181949	0.195444
29.7712	0.560703	0.289031	0.181524	0.210136
29.8397	0.589176	0.281207	0.158941	0.184163
29.9081	0.6077	0.273324	0.178011	0.195734
29.9766	0.598487	0.276568	0.172526	0.195452
30.045	0.581583	0.284267	0.182023	0.176393
30.1134	0.549538	0.284923	0.163196	0.169553
30.1819	0.565713	0.301224	0.194249	0.148565
30.2503	0.570761	0.310165	0.172782	0.17352
30.3188	0.569337	0.30351	0.19694	0.181025
30.3872	0.566173	0.320443	0.144802	0.198247
30.4556	0.564106	0.341253	0.149551	0.197771
30.5241	0.589328	0.337283	0.171129	0.175415
30.5925	0.570292	0.335193	0.166294	0.18596
30.661	0.523461	0.305972	0.131498	0.198919
30.7294	0.512885	0.312493	0.138877	0.197137
30.7978	0.515591	0.316006	0.146045	0.230501
30.8663	0.485406	0.323614	0.162494	0.237183
30.9347	0.449292	0.313565	0.133336	0.25497
31.0032	0.451886	0.30581	0.125313	0.255095
31.0716	0.431263	0.310164	0.12354	0.244468
31.14	0.415495	0.298697	0.136775	0.274854
31.2085	0.395843	0.276881	0.141136	0.28464
31.2769	0.388977	0.299485	0.161612	0.255436
31.3454	0.401783	0.271377	0.183127	0.28394
31.4138	0.435471	0.27493	0.196583	0.298445
31.4822	0.438861	0.287597	0.200691	0.322698
31.5507	0.445453	0.26851	0.214466	0.308618
31.6191	0.436144	0.273446	0.214804	0.299075
31.6876	0.396772	0.272834	0.229394	0.295555
31.756	0.39042	0.284476	0.236029	0.304385
31.8244	0.357013	0.325798	0.248891	0.307903
31.8929	0.345798	0.371069	0.208896	0.31414
31.9613	0.330265	0.423086	0.204408	0.322626
32.0298	0.339967	0.456805	0.211143	0.32902
32.0982	0.311051	0.479529	0.216477	0.308398
32.1666	0.307165	0.509289	0.219354	0.319213
32.2351	0.281814	0.541919	0.232369	0.311836
32.3035	0.290803	0.550201	0.263702	0.331403
32.3719	0.287088	0.584501	0.283714	0.324302
32.4404	0.287309	0.605725	0.309274	0.297576
32.5088	0.287343	0.621712	0.340555	0.288993
32.5773	0.28338	0.640677	0.352247	0.285466
32.6457	0.270561	0.666877	0.372794	0.268156
32.7141	0.273738	0.68098	0.378517	0.243958
32.7826	0.26122	0.721758	0.475941	0.211612
32.851	0.253904	0.743878	0.539905	0.230153
32.9195	0.251564	0.763757	0.604475	0.177687
32.9879	0.258423	0.783104	0.659798	0.159823
33.0563	0.278525	0.80834	0.713385	0.157612
33.1248	0.287035	0.836332	0.770616	0.143133
33.1932	0.299643	0.851462	0.826635	0.122751
33.2617	0.303945	0.86411	0.874465	0.120057
33.3301	0.319349	0.8637	0.934764	0.126329
33.3985	0.330425	0.870396	0.981229	0.116935
33.467	0.333398	0.896876	0.994494	0.107725
33.5354	0.36004	0.9077	1.02061	0.106717
33.6039	0.383047	0.906978	0.998798	0.108344
33.6723	0.401134	0.902929	0.980397	0.112846
33.7407	0.424927	0.847545	0.982781	0.105529
33.8092	0.437263	0.772089	0.914806	0.111592
33.8776	0.443255	0.764343	0.929672	0.0910964
33.9461	0.463318	0.732246	0.843836	0.0977066
34.0145	0.49629	0.689041	0.81177	0.105377
34.0829	0.526381	0.660249	0.707455	0.105322
34.1514	0.549815	0.618074	0.597986	0.129584
34.2198	0.564748	0.55697	0.52502	0.126134
34.2883	0.593758	0.459883	0.506865	0.136684
34.3567	0.616862	0.414902	0.467465	0.132755
34.4251	0.654112	0.425422	0.454956	0.115531
34.4936	0.684393	0.396347	0.436685	0.114001
34.562	0.682841	0.340956	0.450372	0.132603
34.6305	0.679434	0.294457	0.466026	0.10625
34.6989	0.68137	0.295993	0.466159	0.137549
34.7673	0.684758	0.279395	0.46925	0.188119

## Sheet: Fig 2a
0	0	0	0	0	0	0	0	0	0	0	0	0	0	0	0	0	0	0	0	0	0	0	0	0	0	0	0	0	0	0	0	0	0	0	0	0	0	0	0	0	0	0	0	0	0	0	0	0	0
0	0	0	0	0	0	0	0	0	0	0	0	0	0	0	0	0	0	0	0	0	0	0	0	0	0	0	0	0	0	0	0	0	0	0	0	0	0	0	0	0	0	0	0	0	0	0	0	0	0
0	0	0	0	0	0	0	0	0	0	0	0	0	0	0	0	0	0	0	0	0	0	0	0	0	0	0	0	0	0	0	0	0	0	0	0	0	0	0	0	0	0	0	0	0	0	0	0	0	0
0	0	0	0	0	0	0	0	0	0	0	0	0	0	0	0	0	0	0	0	0	0	0	0	0	0	0	0	0	0	0	0	0	0	0	0	0	0	0	0	0	0	0	0	0	0	0	0	0	0
0	0	0	0	0	0	0	0	0	0	0	0	0	0	0	0	0	0	0	0	0	0	0	0	0	0	0	0	0	0	0	0	0	0	0	0	0	0	0	0	0	0	0	0	0	0	0	0	0	0
0	0	0	0	0	0	0	0	0	0	0	0	0	0	0	0	0	0	0	0	0	0	0	0	0	0	0	2.75	3.25	2.25	3	4.25	4	2.75	3.25	3.25	2.25	4	3.25	4.5	3	3.25	2.5	2.25	3.75	2.75	2	3.25	1.5	2.75
0	0	0	0	0	0	0	0	0	0	0	0	0	0	0	0	0	0	0	0	0	0	0	0	0	0	0	6.75	5.75	6.75	4.5	5.25	5	6	5.5	5.25	6.5	6	4.75	5.25	5.75	5.25	4	4	5.5	6.5	4.25	6.75	6	5.75
0	0	0	0	0	0	0	0	0	0	0	0	0	0	0	0	0	0	0	0	0	0	0	0	0	0	0	4	4	4.5	5.25	4.75	4.25	3.5	4.25	4	5	4	5	3.75	4.25	2.5	3.5	4.25	4.25	4.25	4.75	3.75	4.75	4.75
0	0	0	0	0	0	0	0	0	0	0	0	0	0	0	0	0	0	0	0	0	0	0	0	0	0	0	2.75	4.5	4	4.25	4.5	4.75	4	4.5	3.5	3.75	4.75	4.75	3.75	4.25	4.75	5	3.5	3.75	5.25	3.5	5	3.75	3.75
0	0	0	0	0	0	0	0	0	0	0	0	0	0	0	0	0	0	0	0	0	0	0	0	0	0	0	6.75	6.5	6.25	9.25	7.5	7.5	8.5	6.75	7.5	7	9.75	8.25	8	8.75	6.25	9.5	6.75	7.75	7.75	6.75	9.25	7.5	7
0	0	0	0	0	0	0	0	0	0	0	0	0	0	0	0	0	0	0	0	0	0	0	0	0	0	0	29	34.25	34.75	39.5	36	36	32.75	33	33.25	36	35.75	32.75	34.75	35.5	34.25	34.75	35.75	35.25	34	37.75	37.5	42	37.25
0	0	0	0	0	0	0	0	0	0	0	0	0	0	0	0	0	0	0	0	0	0	0	0	0	0	0	87	93.25	89.5	90.5	96.75	88.75	85.75	90	93.25	97.25	92.25	87.25	85	94	92.75	91	90.75	93	96.5	91	95.5	95.25	91.5
0	0	0	0	0	0	0	0	0	0	0	0	0	0	0	0	0	0	0	0	0	0	0	0	0	0	0	110.75	132.5	128	122.75	125.5	131	130.75	126.5	130	120.5	132.25	129.25	123.25	144.5	115.25	127.75	130.5	129	127.75	121.25	124.5	126.25	128
0	0	0	0	0	0	0	0	0	0	0	0	0	0	0	0	0	0	0	0	0	0	0	0	0	0	0	137.25	138.75	132.75	158	138.25	143.5	145.5	151.5	151.75	137	146	142.5	137.5	158	158.25	156.75	153.5	151.25	138	141.5	148.25	150.5	143.25
0	0	0	0	0	0	0	0	0	0	0	0	0	0	0	0	0	0	0	0	0	0	0	0	0	0	0	165.25	145	160.25	176.75	169.25	165	155	165	167.5	172.25	166.5	159	165.5	169.5	162.25	157.25	151.5	166.5	155	173	160	161.75	178.5
0	0	0	0	0	0	0	0	0	0	0	0	0	0	0	0	0	0	0	0	0	0	0	0	0	0	0	178	165.25	174.25	169.75	175.25	195.25	180	179.75	171.25	191.25	180	167.5	191.75	181.25	176.25	185.5	179.25	171.5	159.25	175.5	181.25	172.25	183.75
0	0	0	0	0	0	0	0	0	0	0	0	0	0	0	0	0	0	0	0	0	0	0	0	0	0	0	188.5	187.5	182.75	192	184.5	192	184.75	192.75	199.25	182	192.25	184.25	188	182.75	201.25	192.5	197.25	199.25	185.75	177.75	208.25	180.5	198.5
0	0	0	0	0	0	0	0	0	0	0	0	0	0	0	0	0	0	0	0	0	0	0	0	0	0	0	193.5	204.5	200.25	197.5	187.75	199.25	196.75	195	197	201	203.5	205.75	195.75	213.25	201.25	204	199.25	206.25	209	191.5	201.25	198.75	200.75
0	0	0	0	0	0	0	0	0	0	0	0	0	0	0	0	0	0	0	0	0	0	0	0	0	0	0	195.5	203.5	221.75	223.75	214.5	205.25	222.5	208.75	203.5	212.5	208.25	213.5	216	209.5	196.75	207.75	199.25	202	205.75	212.5	219	204.5	200.25
0	0	0	0	0	0	0	0	0	0	0	0	0	0	0	0	0	0	0	0	0	0	0	0	0	0	0	188.5	210.75	209.25	218	210.75	212.25	204.5	212	233.25	221	216.25	220.5	215	200.5	215	210.5	220.5	218.75	223.5	213	217	219	206.75
0	0	0	0	0	0	0	0	0	0	0	0	0	0	0	0	0	0	0	0	0	0	0	0	0	0	0	202	212.75	210.5	223.5	220	212	212.75	210.75	208.25	232.25	225.5	215.5	218	217.5	201.75	203.5	206	215.25	207.75	214.5	212	212.75	227
391.6	441	486.5	410.25	365.25	338.5	307.25	283.5	265.75	235.25	237.25	230.75	216	215.5	228	212.25	223.5	220.4	212	211	208	200.5	189	0	0	0	97.5	211	215	228.75	219.25	220.75	223.5	223.75	212.75	218.75	217	214	224.75	223	228	218.25	219.25	222.75	212.5	222.75	222	224.75	219	220.5
377.5	413	426.25	361.75	348.5	324.25	283	269.5	259.5	246	256.25	246.75	233	242.5	226	237	223	219.25	231.5	223	228.25	223.5	205.25	0	0	0	104.75	213	224.5	225.75	232.25	236	223.5	229	224.5	235.5	234.25	224.75	220.75	224.75	227.25	234.5	225.75	225.25	229.25	234	233.75	230.75	229.25	219.5
348	370.5	406.75	333.25	345	299.5	297.75	285	266.5	250.75	252.5	249.25	239.25	237.25	241.25	240.5	242.5	236.5	243.5	229.25	239.25	220.25	208.25	0	0	0	105.75	222	236.75	237.25	243	240	241.75	245.75	236.25	235	239	233.25	228.75	233	235	243.25	237	236.25	227	230	234.75	237	233.75	230.25
319.75	344	377.25	333	327	297.25	286.25	259.5	272	251.25	248.75	247.5	243.75	239	251.25	248.5	246	228	237.833	225.25	241.5	228.5	211.75	0	0	0	105	230	244.5	233.5	249.25	248.5	252.25	245.5	238.5	239.75	228.75	250.75	246.5	245	240	241.25	247.25	243	237.75	233.75	252	236.75	239.25	236
320	338	340.25	313.25	300.25	295.5	270.25	253.25	249.75	255.5	268.75	259.5	260.5	242.5	238	244	227.25	245.5	254.333	233.5	233.75	242.75	210	0	0	0	106.75	238.5	228.75	249.25	236.25	247.5	248.25	247.25	248.5	239.5	245.75	251.5	242.5	249.75	249	247.25	250.75	244.75	233.75	242.25	251.25	248.5	234.5	245
322.5	327.5	349.5	316	307.25	291.75	263.75	274.25	262.25	255	266.75	239.5	258	257.5	254.5	255.75	261.5	250	253	238.25	246	243.5	211	0	0	0	107.5	237.25	247.5	246.25	243	249.25	247.5	241.5	248.75	241.5	240	243	236.75	241	247.5	235.5	242	250.5	238.5	247.75	238.75	232	235.5	251.25
287.25	311.5	337.25	311.5	298.75	300.25	276.25	263.75	262.25	258	271.25	266.5	252.5	258.5	246.5	245	256.5	266.5	254.167	251.5	245	241.75	222.5	0	0	0	107.5	238.75	254.5	254.75	253.25	260.25	244.25	256	243	265.25	253.75	248	225.75	252	249.75	230.25	246.25	241	243.75	243	239.75	258.25	256.75	252.25
289.25	276.5	330.5	286.25	277.75	284.5	268.25	276.25	262.5	264.25	248	261.75	255.75	257.25	262	255	255.5	257.75	257.5	250.333	249.5	260	226.25	0	0	0	114.25	250.25	246.5	256.25	254.25	246.5	253	252.25	249.25	251.5	256.75	248.5	252	250.5	258.5	262	237.5	246	259.25	239.5	256.75	251.75	246	267
309.5	310.5	307.25	295	271.25	274.75	263.5	271.75	260.25	269	262.25	263.5	255.5	256.75	268.25	239.5	255.75	235.5	250.5	256.333	259.25	255.75	233.75	0	0	0	109	237.25	246.75	252.5	251.25	257.75	265.5	250.25	276.75	260.5	257.25	244.25	266	271.75	259.5	259.25	260.75	253	248.5	252	263	253	244.5	251
294	308	303.75	293	275	267.25	274.5	269.75	281	267.5	276.5	275	260.75	283.75	264.75	256.25	254.25	260.5	250.75	248.667	254	247.5	218.25	0	0	0	112	250.5	261.5	248	276.25	283.75	258	270.25	264.5	244.25	272.75	249	259.25	261.5	261	266.25	262.25	260.75	263.5	248.5	261.25	260.75	250.75	243.5
280	302.5	303.25	305.5	276.25	285.5	277.5	267	269.25	275	274.75	268	254	261.5	251	266.5	261.25	262	251.5	249.167	261	266	236	0	0	0	116.75	258	256.25	259.5	266	264.25	254.75	274.75	273.5	272	283.25	271.5	281.25	250.25	256.25	274.5	249	261	264	260.25	252.75	255.5	264.5	253.75
263.25	300	301.25	290.5	284.75	282.75	274.5	277.75	280	270	266.5	270	264	264.25	266	257	264.75	253.25	264.5	258	274.333	264.5	237.5	0	0	0	120.75	240.5	263.75	253.5	264.75	256	269	266.5	275.5	246	266.25	265.25	273	258.25	250.75	268.25	266.5	263.75	279.25	266.5	269.75	268	265.75	269.75
277.5	280	293.5	287.5	264.5	294.5	273.5	273.75	266.75	271.25	275.75	292.5	263	275.75	284.25	270	273.25	257.5	259.75	252.75	250.833	254.25	233.25	0	0	0	115.25	267.75	261.75	270.75	270.5	267.25	270.5	257	260.75	272.25	273	279.5	269.25	266	263.25	283.5	282.5	262	274.75	275.5	271.5	253.75	280.5	274.75
286.25	288.5	305.75	276.5	282.75	287	269	272	290	253	274.75	278.5	262.75	269.75	260.25	262.25	271.5	264.25	254.5	268	260.667	247.75	243.25	0	0	0	131.25	254	275.75	270.5	258.5	254.5	276.25	263.5	272.25	263	257.75	278.75	269.25	273	267.75	267.25	277.75	271.75	271.5	265.25	260	279	264.8	276.333
290.25	290.5	295.25	286.5	288.25	271	263.5	273.25	279.25	274	271.75	267.25	265.75	266.25	268.75	268	268.75	259.75	251.25	269.75	258.75	253.333	223.5	0	0	0	115	251.25	253.75	257.5	258.25	266.75	264.5	266.25	263.5	271	260.25	264	268.25	264.75	261.25	268.75	269	263.75	255.5	263.75	264.333	261.667	259	261.25
280.75	277	289	285.75	275.25	268.75	274.75	268	271.25	260.25	288	262	263.75	271.75	273.75	272.5	264	272	264	272	272.25	259.333	242	0	0	0	125.75	251	256.25	270.5	267.25	269.25	261.5	270.75	271.25	266.25	259	267.75	269.5	273.5	265.25	272	269.5	264.4	270.833	261	266.25	256.75	268.75	273.75
291	281.5	293.25	291	275.75	277.5	288	268.75	280.5	280.5	273.75	274.25	259.5	266	276.5	283	268.5	261	264.25	275.75	276.25	271.6	247	0	0	0	124	251.75	271.75	281.25	264	271.25	263.25	274.75	278	259	276.75	277.75	265.75	277	270.5	281.5	276.333	270.4	277.75	266.5	271.75	270	268.25	279.25
289.75	314	282.25	296	275	287	281.5	284.25	270.5	256	290.25	283.5	264.75	265.75	262.25	275.25	276.5	273.5	276.5	287.5	270.5	270	259	0	0	0	123.25	266.5	266	276.5	276.5	283.75	283	273.75	273	273	277.25	274	277	272.5	275.333	268	269	280.75	268.5	282.25	272	282.75	284	283
288.75	300.5	289	279.5	288.5	284.25	279.25	283.5	279	271.5	274.25	282.25	277	286	263	278	273.75	268.75	262.75	276.75	271.5	277.25	252	0	0	0	121	271.75	272.25	288.5	275	274.5	279.5	268.75	292.5	284	284.667	278.333	277.4	275.25	279.75	267.5	278.5	271.5	272	268.5	267.75	276	276.25	278.25
294.5	286.5	281.5	284	285	283.75	284.5	282.5	290.75	280	276.25	281.25	281	278.75	277	278	278.75	279.5	290	268.25	284.5	280.25	257.75	81.1667	0	0	125.25	260	286	281	280.5	289.25	279	277	279.5	282.4	273.5	284	277.5	278.75	285	286.25	293.5	276	274	299.5	277	282.25	282	280.25
294.75	297.5	305.5	285.25	285.25	279.25	299.25	282	285	275.25	277.5	287.5	291.25	280	276.5	295.5	280.5	285.5	279.75	279	269.75	282	254	75.5	0	0	126.5	268.5	284.5	280.4	287.833	289	289.4	291.5	283.75	294	291.75	287.75	286.25	273.25	285.25	278.75	293	285	287.75	283.25	277.75	271.5	280.75	286.75
280.75	298.5	288.667	280	287.75	299	287.75	285	291	273	283	279.5	271.5	288.75	285.5	284.25	274.5	288	282	281	264	264.25	260.75	119	0	0	127.5	269.833	282.333	282.4	289.5	283.75	297	287.25	279.25	290.5	282.25	279.5	283.5	282.75	293.5	276	284.25	284.5	296.75	282.5	291.5	279	287	283.75
289.667	297.5	308.5	292.667	287.75	300.5	291.5	297.75	292.75	281	281.5	300.75	275.25	280.75	283	281.25	280.75	273	277.25	288	283.25	264.5	258.833	119.667	0	0	128.25	275.75	267.75	273.5	284	286.25	285.5	297.5	286.25	283	283.5	289.5	289.75	283.75	288.75	282.75	288.5	294.5	278	283	280.75	298.75	278	286
297.5	284.5	298.5	291.333	291	294.25	293.25	286.25	288.25	280.75	288	278.5	279.5	284.5	290.25	289.75	292.6	282	279.333	270.667	280.667	282.167	259.25	117.75	0	0	126	279.25	280.25	276.25	289.75	278.5	279.75	293	273	285.25	286.75	279.5	283	284.5	284	287.5	284.5	291.25	281.25	293.75	287	292	282.5	292
287.5	280.5	300.5	282.667	281.75	290.5	291.75	298.75	297.667	276.667	290	290.833	280.667	279.5	292.833	288.333	284	286.5	282.75	294.5	293.25	278.75	257.25	125.5	0	0	125.75	275.5	286.25	289.25	292	294.5	288.75	283	286.75	297.25	295.5	283.75	292.5	287	293	280.25	287	288	288.75	291.25	291.5	283.25	291	281.75
292.667	293.667	291.333	297.222	284.333	299.5	295.5	287.5	286.75	287.5	281	291.75	291.75	289.75	286	289.25	284.75	296	287.75	281.75	292.5	277.25	262.75	121.5	0	0	82.3333	269	280.25	288.75	283.5	278.25	294.5	292	290.75	291.5	286.5	292.75	287	297	285.5	292.75	282	299	302.75	290.25	282.75	296.25	285.75	295.25
293.5	291	0	293.5	308.25	298.5	292	293.25	287.75	291.5	282.5	299.75	290.25	291	282.75	282.75	283.75	284	286.25	294	289.75	279.25	266	124.25	0	0	86	282.75	294.5	288.75	290.25	299.75	293.5	290.25	299	285.25	288.25	292.75	294.75	289.25	286.5	292.5	289	290.25	278	278.25	286.5	291.75	290	282.75
0	299	0	299.571	296	297.75	295	299.75	281.75	295.25	292.5	286.5	292.25	283.25	300	279	275.25	280.5	291.75	286.75	285.5	272	276.25	120	0	0	0	271.5	283.25	285.75	298.25	292.5	279.5	284.75	276.5	293.25	282.75	295	292.5	284.75	298	291.75	295.75	292.75	284.25	290	294.5	290	292.25	297.25
0	299	0	297.5	290	295	292	287.75	281.75	286.5	294.25	292.25	289.5	287.75	286.75	292	283.75	284	275.75	283.75	296	290.75	270.75	120.5	0	0	0	277.333	296.5	279.25	283.75	292	299.5	288.25	290	295.25	292.25	297	296.75	289.5	304	285.5	282.25	294	292.5	285.75	298.25	299.25	283.75	290.75
0	287.5	0	300	296	296	296.25	284.75	289.75	295	289.5	292.25	291.5	289	290.5	283.75	285.5	289.25	284	285.75	290.5	287.75	275.25	116.25	0	0	0	273.75	297.833	293.75	288.75	292	291.75	286.25	289.25	288.75	300.75	303.25	295.5	293.5	297.75	300	311.25	304.75	292.75	297.25	290	293.75	295.5	288.5
0	298.5	0	301	298.5	291.75	296.5	294.75	293.5	288	298.5	290	296.75	287	296.25	282	295	286	288.5	293.25	279.5	282.75	269.5	121	0	0	0	265.25	293	294.75	285.25	289.5	302	307.75	308.25	310.25	289.75	288.25	287.5	298.75	307	289.75	290.75	294.75	297.25	289.75	293.75	289.5	288	293
0	274.5	0	287.667	298.667	287.5	292	294	294	293.75	293.25	287	298.5	295	295.75	292.25	281.75	295.75	280	285	275.25	291.75	277	126.5	0	0	0	273.25	283.75	291.167	297.25	290	286.25	282	284.25	297.5	297.75	301.5	293.5	288.5	299.75	288.75	297.25	290.5	298	296.25	289.75	310.5	294.25	297.5
0	299	0	295	304.5	308.333	300.5	309	293.75	298	295	293.75	292.5	288	290.25	293.25	295.25	291.75	280	286.75	279	286	273.25	126.75	0	0	0	269.75	297.25	300.8	295.8	303.5	302.25	299	296.75	306.5	301.75	304.25	290	295.5	296.25	299.5	292.5	301	292.25	299.5	297	297	285.25	286
0	311	0	295	301.5	298	299.75	287	293	305.75	292.25	295.75	301.5	293.25	296.5	290.75	297.25	296.5	297	286.75	281.25	292.5	270.5	120.75	0	0	0	274.25	307.5	296.5	299.333	300.75	295	301	293.75	313.5	295.75	293.75	309.5	297.5	305.75	302.25	297	299.75	304.5	298.25	290.25	300.75	293.25	307
0	312.5	0	307.833	302.5	303	293.75	300.5	299	300	296.25	291.75	289.75	291.25	290.75	305.25	291	296.25	292	287.25	292.25	288.75	269	125.5	0	0	0	277	301.75	302.25	298.6	307.4	296.25	292.25	298.25	298.25	291.25	301	296.75	291.5	290.25	311.25	302.75	305.25	302.25	293.5	300.25	295	303.75	302
0	300	0	298.5	303.333	302	301.75	299.75	302.5	286.75	292.25	304.5	300.75	284.75	312.25	285.75	280	289.25	295	292.25	289.25	298.25	278.25	126.25	0	0	0	277.25	298	306.25	307.5	304.833	317	295.25	307	310	296.25	299	299.25	304.5	302	304.25	303.5	293.5	296.5	310.25	290.75	288.5	290	303.75
0	291.5	0	304	301	295.75	302.667	293.75	299	291.75	294.5	292.75	299.25	301	302	284.25	291	307.25	292.25	292.5	281.75	294.75	282.25	129	0	0	0	286	287.5	288.75	302	300.2	311.2	294.5	294.75	309.5	297.25	303	301	302.25	293.75	298	293.75	299.25	305	295.5	298.5	302	300.75	311.25
0	294.5	0	296.5	296.667	297	300.667	305.25	286	290.75	303.5	300.75	306.25	298.5	305.5	291.5	301.5	280.75	288.75	301.25	287.5	290.25	281	127.5	0	0	0	283.25	290.25	298.25	307	305.75	303.167	304	304.25	297.75	300.5	302	282.75	298.5	300.5	305.25	295.25	303.75	296.25	291.5	307.5	300.5	306.5	287.75
0	304.5	0	316	301.667	290.75	299	311.75	290.5	292.25	309	301.25	300	290.5	299.25	307	290	296.25	294.5	280.25	289	292	269.75	132	0	0	0	281.5	295.75	302.5	294.5	292.5	295.2	303.8	298.75	303.25	302.75	302.75	307.75	296.25	296.5	305	301.75	302	303.5	287.75	309.75	306.5	309.25	296.25
0	298.5	0	305.5	298	292	296	302	304.25	285.75	302	288.75	298.75	296.5	292.75	296.75	291	294	293.75	301	336	301	287.75	127	0	0	0	276.75	301.75	307	306.75	304	298.5	299	304.5	292.25	300	310	311.5	292.25	301	305.25	308.5	300.75	293.75	295.75	303	301	302.25	301.25
0	300.5	0	291.5	296.875	300.75	300.25	295.167	292.25	307.25	302	302.75	292.75	294.25	292.5	307.75	297	289.5	310	307.25	288.25	290	278.75	123.5	0	0	0	287.5	293.25	308	318	312.5	303.75	305	309.833	301.75	296	305	304.25	300	309.75	298	302.75	295.75	296.5	295.25	308.25	301.25	310.75	295.25
0	303.5	0	0	306.25	306.667	300.25	309	296.8	297.25	311.75	297.75	304.25	322.5	299.25	306.5	294	306.25	300.25	305.75	289.75	289.75	279.5	135.75	0	0	0	280	298.5	311.75	306.75	293	304	289.25	312.167	294.75	301.5	316	307	312	308.75	299	313.75	289.75	295	291	308.75	313.75	297.75	315.5
0	333	0	0	313.25	331.333	330	395.25	312.167	302.75	321	308.5	299.5	317	318.5	307.25	300.5	296.25	289.5	291.5	286	292.5	275.75	129.25	0	0	0	277.75	309	297.5	301	300.25	304	302.25	303.25	308	311.5	301.75	304	308.5	304.25	305.5	304.5	321.75	309.5	305.25	303	309.25	313	294.25
0	314	0	0	318.75	312.833	314	310.5	305.333	299.25	309.75	311.75	294.25	302.25	291.5	298	294.25	306.5	305.5	298.25	290.25	293	278	125.25	0	0	0	283.25	291.5	307.5	293.75	306.5	306	308	304.75	297.833	305.25	310.75	306	313	320	311.5	310.25	306	340.25	349	320.5	301	305.5	307.5
0	297.5	0	0	298.75	300.667	302.5	306	304	302.333	296.75	299.75	305.75	289.25	297	301.75	297	290.25	298.25	285.75	294.5	295	295.25	129.25	0	0	0	279	302.25	302.75	311.75	305.5	308.25	306.75	306.5	302.25	309.333	311	320.5	300.75	309	298.25	312	310	298.5	314.5	307.75	307	303.75	307.5
0	321.5	0	0	302.75	297.6	306.6	316	297.75	298.5	289	297.25	300.75	300.25	301	307.5	289.25	294.75	293.75	295	301	291.5	279.25	128.5	0	0	0	283	307.5	300.5	302	307.75	312.5	301.5	298.75	311.75	307.6	310	308	321.75	317.75	322.5	309.25	309.25	315.5	304.25	304.25	303.75	312	312.5
0	308	0	0	302.333	301.333	301.833	293.25	298.25	300.8	307.6	304	299.25	299	292.75	295.5	307.5	294.75	288.75	289.5	283.5	294.75	276.25	126.75	0	0	0	278.25	307.75	299.5	311.75	302.5	322.25	302	311.5	300.25	309.5	307.5	310	312.5	317.5	312.75	305.25	303.25	307.75	306	315.5	298	313.25	302
0	296	0	0	293.667	298.167	303.667	303.25	298.5	291.75	299	288.25	297	296	295	292.75	292.75	289.5	285.25	298	297.25	300.75	271.5	129	0	0	0	288	295.5	298.5	299	308.75	299.75	298.5	307.25	302.5	312.25	318	325.4	305.75	317.5	308.75	306.75	317.5	313.25	304.75	300.25	304	304.5	305.25
0	291	0	0	303.333	296.167	300.833	294.75	296	304.75	303.8	297.4	295.25	294.5	299.75	298.25	303.75	296.5	302.25	298.5	285.25	296	284.75	132	0	0	0	275.25	302.5	304.25	306	306.5	303.25	311.5	317.5	312.25	309.75	320	317.167	306	308.5	317.75	304.5	311.5	317.25	314.75	307.75	307.75	304	310.75
0	312.5	0	0	306.4	303.286	296.2	302	299	303.5	305	300.333	302.25	302.5	297	311.75	303.25	295	297.5	301.75	304.75	296.25	295.25	129.5	0	0	0	289.5	301.25	316	311.5	304.75	315	316	321	311.25	305.75	312.5	310	307.833	310.75	317	315	306	321.25	316.5	315.75	316	312.5	314.25
0	303.5	0	0	317.25	299.875	309.25	294.167	304.75	301.75	308.5	304.2	297.2	306.75	301.75	301.25	304.75	298.5	294	308	304.5	293	284.25	129.5	0	0	0	285.5	306.25	315	311.75	337.75	314.75	301.75	318.75	320	311.5	309.75	307	310.5	316.5	309.5	312.5	310.25	301	301	317.25	304	309.5	320.25
0	312	0	0	302	311.125	299.8	304.167	292	309.25	297	289.5	293.667	301.5	288.25	304.5	301.75	307.5	295.25	302.5	289.75	291.75	289.25	129	0	0	0	288.25	306.25	315.75	320	360	304.5	312.5	320.5	325	316	322.25	314.5	312	312.667	317.5	315	318.75	319	301.5	306.75	320.25	307	310
0	304	0	0	316	305.667	307.667	303.667	306.25	303	296.5	287	297	300	305.25	312	297.25	303	277.75	301.5	294	299.25	285	133	0	0	0	290	310.25	316.5	320	314	308.25	306.25	302.5	313	313.75	315.75	313.75	313.5	314.2	312.8	316.25	309.5	296	305.25	312.25	316.5	318.5	308.25
0	304	0	0	0	305.2	303.667	306.5	306.667	289.5	297	316.75	311.75	302.833	299.75	310.25	298.75	299.25	295.75	304.25	294.75	305.25	287.5	135.5	0	0	0	281.25	307	307	312	301.75	320.25	322.25	312.5	310.5	318.5	314.25	290.75	304.25	309.75	313.667	309.75	313.75	312.25	305.5	307	311.5	318.25	307.25
0	294	0	0	0	311.4	307.5	313	300.167	297.5	309	298.25	309	300.75	300	298.25	300.5	297.75	316.5	310.5	324.75	296.75	284.25	129.25	0	0	0	284.75	314.75	309.75	304.25	316.5	310.25	317.5	324	312.25	318	312	319	323	310	310	310.6	312.25	309.75	310	316.75	313	315	317
0	294.5	0	0	0	311.556	311.429	302.75	315.667	306.75	307.75	312.25	317	329.5	329.8	317.2	304.25	318.5	309.75	301.25	290.25	295	289.5	136	0	0	0	293.5	322.5	311.25	318.25	308	313.25	312	311.75	318.75	312.25	320	314.5	318.25	306.5	322	316	311.5	304.75	307.5	315.25	310.4	317.667	306.667
0	325.5	0	0	0	323.25	318	300	317.25	322.667	310.25	320.25	322.5	325	323.75	305.667	318.75	314.25	305.25	296.5	293.5	289.75	298.5	129.75	0	0	0	285.5	311	318.75	311.75	305.25	310.25	308	314	321.5	300.5	308.75	310.75	302.5	307.25	306.5	320	319.667	317	314.167	309.333	316.4	311.75	312
0	299.5	0	0	0	316	320.167	314.667	316.5	305.833	307.5	304	326.25	312.25	313.5	318.4	306.2	312.75	303	305.25	299.75	299.75	296	128.5	0	0	0	283.25	311.5	316	319	330.25	312.25	309.75	306	315.25	307.5	320.5	318	312.75	300.25	307.2	317	311.375	321.833	315.75	314.75	323.25	315.25	318.5
0	313.5	0	0	0	314	312.571	316.5	309.25	308	316.2	306.5	320.25	308	329	312.25	313.167	308.5	308.25	302.5	296.75	288.25	291	137.25	0	0	0	293	318.25	317.25	310.5	312.75	325.5	304.5	325.25	317	323	320.5	316.333	312	321.167	319	320	321.75	320.333	307.5	321.75	309.25	313.5	311.25
0	307	0	0	0	311.333	313.75	303.667	308.25	309.5	318	308.25	309	311	312	317	306.25	313.333	293.5	309.25	300.25	290.5	291.25	131	0	0	0	295	310.25	314	325.25	315.25	318.75	307.2	323.833	317.167	317.667	316	314	331	314	305.25	317.25	325	320.25	310.667	305.25	327	330	356.5
0	307	0	0	0	308.8	305.375	306	305.167	316	303.833	305.75	313.25	308.25	298.5	298.25	311.75	303	303.2	305.75	301.5	295.5	272	131.5	0	0	0	289	305.5	315.833	309.333	313.667	318.333	316.4	309	313	318.5	322.75	312	321.75	307.25	329	333.25	317.25	318.5	315	327.5	331	366.5	380
0	305.5	0	0	0	307.25	307.375	304.833	311.833	309.75	315.25	305.833	310	306.75	301	303.75	304	297.5	303.2	307	309.5	304.75	283.5	133	0	0	0	293	311.333	326.25	314	306.5	308.5	305.75	327.25	315.5	316.25	311.25	308.75	316.5	329.5	325.25	307.75	322.75	314.25	323.75	349.667	383.5	401	394.75
0	305	0	0	0	314	307.545	310	297	306.75	286.5	306.5	305.25	306.75	313.75	309.75	305.167	298.667	306.5	296	306.143	302.667	287	131.25	0	0	0	282.75	312.25	317.5	318.75	321.75	321	312.75	324	324	299.5	316.25	314	318.5	324	319.25	322.5	320.75	348	364.25	396.8	406.2	388	384.75
0	310.333	0	0	0	0	304.294	301.1	309.5	314.556	307.5	306.5	306.333	303	311.333	309.833	298.5	316.75	307	305.5	299.667	306	281.5	137.75	0	0	0	288.75	311.75	317	326.75	312.75	302.5	318	321.25	321.75	317.5	323.75	309.25	322.5	323	333.25	348	367.75	401.75	403.25	406.5	392.667	374.25	375.75
0	310	0	0	0	0	305.4	306.286	315.4	311.5	306.5	296	309.167	306	309	308	313.5	301	305.75	300.5	313	297.833	289.75	134.75	0	0	0	297	308.75	315.25	326.75	315	324.5	315	314.25	313.75	329.5	325.5	313	325.5	344	386.75	395.5	410.75	402.25	396.75	375.75	372.6	363.8	367.75
0	319.5	0	0	0	0	312.4	309.833	305	312	312.6	312.5	305.75	313	303.25	304.25	304.5	304	305.25	311.5	307	296.8	291.8	133	0	0	0	289	320.5	315	318.25	321.75	305.25	321.25	303	329.25	321	337.25	352	369.25	396	393	395	393	368.75	383	360.75	381.5	373.333	377
0	328	0	0	0	0	308.75	311.125	312.5	297.75	306.333	314.5	298.5	305.333	310.75	315.25	306.25	308.75	300.75	305.25	309	313.25	299.2	166.6	0	0	0	294	318.75	316.5	320.25	308.25	325.5	323.75	327.5	354	364	385.25	403.25	405.25	406	394.25	386.5	381.75	379.75	366	348.75	384.25	371	360.167
0	327	0	0	0	0	320.375	306	323.167	303.75	317	321	322	319.5	313.333	311	317.5	315.25	308	324.5	306	308.5	305.5	186.667	0	0	0	288	299.5	311.25	329.25	336.25	349.5	358.25	377	389	406	404.75	402	410	388.75	387.5	368.25	377.5	383	379.5	377	378.75	386	403.833
0	309	0	0	0	0	324.833	316.375	307.333	319.167	321.8	315	309.25	310.75	319	318.5	308.5	325.25	324.5	315.25	311.5	314	308.75	284.5	0	0	0	299.75	317.5	333.75	353.75	371.5	405.5	407.5	392.75	403.75	398.5	388	398.25	384	369.75	384.5	358.25	368	375.25	373.25	383	394	408.75	469.75
0	321.5	0	0	0	0	308.8	316.778	301.667	307.5	313.25	314.667	311.25	317.75	319.75	317.167	308.75	308.75	311.5	313	310.25	309.25	299.75	289.5	0	0	0	331	366.25	392.5	399	416.25	403	402.75	397.75	396.25	384.5	380.75	373.75	382.25	365.75	355.25	377	397.75	377.75	388.5	426	475.5	504.75	572.75
0	298.5	0	0	0	0	314	310.727	317.667	311.333	320.5	325	310	308	312.75	323.4	318.2	320	325.25	320	322.75	323.25	334.25	317.5	0	0	0	368.75	400.25	410.75	414.75	401	388.25	388.75	377.75	380.25	368.75	377.25	368.75	383.25	370.25	374.75	384.5	395	435.25	492.5	600	586.75	535.25	502
0	311.5	0	0	0	0	0	314.583	323.5	318.6	313.8	317.5	311.667	311	340.25	328	336.833	360	352.5	358.75	372	365.75	393.5	353.75	0	0	0	358.75	391.25	402.75	383.5	374.75	373.75	385.75	376.75	382.75	384	369.75	382.5	378.75	387	405	460.25	503	543	603.25	587	519	483.75	432.25
0	341.5	0	0	0	0	0	343.417	333.833	343.333	346.5	359	362	363.25	370	384.5	383.2	415.8	411	386.75	397.25	403.25	377.5	364.75	0	0	0	236.333	380.75	389.5	372.25	393	378.5	385.5	378.5	383.5	387.25	399.75	402	419.5	471.5	557	660.75	622	556.25	524.75	475.25	440.75	403	407.5
0	394	0	0	0	0	0	391.091	398.143	412.333	415	417.25	412.6	405.2	414.75	423	406.25	403	404.75	384.75	389.5	387	361.5	332.25	0	0	0	174.25	367.5	378.75	375.5	371.75	396.25	392.5	397	410.5	433.25	457	529.5	563	646.5	640.5	623.25	557.5	469.25	443.75	404.25	400.5	412.75	390.5
0	400.5	0	0	0	0	0	408.6	403.5	418.167	408.6	420	420.25	394.333	391.25	399	392.5	396	383.167	377.25	375.75	372	374	335	0	0	0	169.25	371.75	387.5	394.25	399.5	418.25	426.75	466.5	510.25	636.25	670	682.25	661.5	586	549.5	478.25	442.5	411.5	409.5	396.25	407.75	419	409.5
0	401	0	0	0	0	0	394.333	392.375	397.143	400.5	403.5	383.5	384.6	392.2	389	390.5	397.25	394.4	376.2	377.25	383.25	374	342.25	0	0	0	182.5	403.25	420	443.8	485	566.5	645	698.75	745	791	704	601.75	559	453.25	418.75	406.5	389.25	401.5	395.5	406.75	404.25	411.75	400.5
0	397	0	0	0	0	0	396.875	398.75	400.833	394.167	397	396	391.75	400.833	394.5	394	386.5	403.25	398.833	385.75	404.5	388.5	365.5	0	0	0	201.5	467.25	557.25	603.2	735.2	778.75	818.75	761.5	663.5	601.5	574.5	468.25	425.75	420.25	403.75	412.5	408	397.25	406.25	410.5	412.5	428.8	425.333
0	408.5	0	0	0	0	0	404.667	412.7	410	407.333	400.5	415.333	413	416	412	424.25	419.5	430	423.8	451.2	450	484.25	513.25	0	0	0	330.75	745	844	836	775.167	690.25	633.5	551	493.75	441.25	437.5	413.75	405.5	401	397.25	395	395.25	409.75	424.333	418.667	428.833	437	436.5
0	449	0	0	0	0	0	443.5	443.364	452.429	456.333	452.75	461.333	465.25	480	505.333	506.5	549	586.75	628.75	733.167	813.25	847.75	870.5	0	0	0	411	821	770.25	701	584.25	518.333	456.25	421.5	411.25	408.5	407.75	405.75	406.25	404	418.5	410.667	414.5	416.667	431	412.25	437.5	451	448.5
0	652	0	0	0	0	0	548	649.538	625.286	688.4	698.833	698.6	871.4	846	897	981	1046.25	1071.25	1091.25	1165.75	1161.67	1031.75	854.75	0	0	0	302.75	574	514.75	480.5	442.25	414	423.5	433.5	401.5	417	414	419.5	402	408.6	422.75	435.75	430	442.25	477.25	438	432.75	469	456.25
0	1531.5	0	0	0	0	0	0	1413.85	1442.71	1437.5	1446.67	1358.25	1474	1450.5	1431	1285.17	1275	1161.5	1033.5	981.75	869.6	692.4	527.25	0	0	0	206.75	410.25	413.75	422.5	417.8	416.833	420.143	416.375	418.833	423.25	412.75	428.25	420	418.75	433	445	438.25	452.75	448	460	467.25	487.5	506.25
0	2051.5	0	0	0	0	0	0	1818.33	1685.88	1593.33	1415.33	1358.5	1257.33	1126.25	1033.5	939.4	794.8	730	628.5	573.25	522.5	475	409	0	0	0	192.833	405	416.667	422	412.6	410.5	408	414.25	424	427	421.5	424.5	422.75	435.25	431.25	450	447.5	472	481.25	485.5	508.5	571.5	656.5
0	1071	0	0	0	0	0	0	1054.18	967.125	856	800.25	738.5	678.5	618	577.25	509.8	474.111	453	441.167	439.833	422.667	411.667	387.875	56.8571	0	0	188.5	397.25	423.75	428.25	424.25	425.75	424.5	443	444.75	428	451.75	447	448.5	454.75	480.25	465.75	478.75	506.5	526.5	559	682.75	1081.5	1722.25
0	507.333	0	0	0	0	0	0	525.857	497.538	491.778	485.889	467.444	459.667	462.556	448.333	451.8	453.5	445.333	420	435.25	410.25	410.25	391.25	124.5	0	0	197.5	416.25	428.75	426.75	434.75	445.75	443	440	458.75	465	452.2	457.25	471.25	495.75	493	499.25	552	617	762.5	1254.5	2266.5	2284.5	2816
0	450	0	0	0	0	0	0	457.857	456.4	456.714	457	454.6	452.4	443.5	440.333	465.5	448.25	440.5	445.5	439.75	435	418	411.25	188.5	0	0	193.75	427.25	449	445.25	451.5	444	462.5	457	471.5	487	503	514.2	492.75	543.5	583.75	672	874.5	1427.75	2448.75	2486	2655.5	2321.75	2201
0	461.5	0	0	0	0	0	0	457.8	467	455.429	457.833	459	460.333	464.75	441	451	470	445	453.667	453	431.25	428	422.5	191.75	0	0	196.75	434.25	448.5	456.75	458	483.75	484	491.5	502	498	522.5	541.8	634.4	842.25	1128.75	1757.75	2183.5	2791.5	2946	2541.25	1826	1567.5	944.5
0	473.5	0	0	0	0	0	0	461	482.429	480.714	485.167	483.5	486.667	469.5	471	482.333	480.25	480.5	460.8	466.8	469.75	445.5	432.75	194	0	0	212	448	474.25	481	498	512.75	503.5	515	555.25	617	687	879.75	1593	2441.25	2583.75	2694	2743.5	2317.5	1807	1381.25	949.75	597.5	504
0	506.5	0	0	0	0	0	0	0	498.571	494.25	500.667	499	488.25	481	482.25	479	485.5	482.25	495.25	480.333	473	475.5	456.75	209.25	0	0	148.167	470.75	508.25	521.25	560.25	584.5	619.25	722.5	960	1368	2174.25	2659.75	2651	2890.5	2369.5	1956	1630	1075.5	722.75	547.75	488.75	443.5	436.5
0	511	0	0	0	0	0	0	0	517.769	522.875	511.286	530.8	522.2	516.833	508.5	513.75	509.333	515.75	506.25	488	519.167	490.75	479.25	225.5	0	0	0	516.5	594.5	673.25	819.25	1143.75	1866	2288.75	2914.25	2894	2923	2668.5	2366	1655.75	1313.83	847.75	612	495.25	466	442.25	411.5	410.25	401.5
0	569.5	0	0	0	0	0	0	0	562.455	557	565.833	551.667	547.833	551.6	535.6	544	553.833	548.25	548.75	549	583.5	556.5	565.5	276.75	0	0	0	813	1423.4	1818.75	2407.25	3003.5	3142.5	2892.5	2861.5	2223.5	1774.5	1480	1178.5	767	603	491.8	449	447.75	426.75	415.5	404.25	400.75	390.75
0	617.5	0	0	0	0	0	0	0	639.4	621.778	646.286	609.333	613.833	635.75	628.5	633.25	640	672.333	717.5	750.5	801.25	974.5	1371	776.75	0	0	0	2593	2752.2	3016.6	3201.25	2890	2140.75	1683.25	1435.5	1022.25	775.25	638.75	515.5	477	447.5	431.8	411	401	396.5	404.5	381.75	386.5	377.5
0	799.5	0	0	0	0	0	0	0	825.875	820.1	812.75	852.167	866	1027.8	1072.2	1316.6	1389.75	1559.33	2663	3559	2913.75	2761	3274.8	1996.5	0	0	0	2699	2413.25	1995.33	1569	1347.75	1008	752.75	580	515.75	461.25	441.5	427.5	436.25	410	421.5	400	384.4	390	377	380.75	365	371.5
0	2887	0	0	0	0	0	0	0	2725.6	2625.58	2883.57	3051.17	3367.83	3312.67	3628.5	4332.5	4311	3592.25	4114.5	3667.75	3616	3650	2584.33	1111	0	0	0	1344	1132.5	936.25	649.5	528.5	495.75	462	438.5	450.5	420.5	404	414	407	396.75	387	378.75	369.667	360.833	368.667	368.167	369.333	354.5
0	6110	0	0	0	0	0	0	0	7069	5695.47	5132.5	4933.83	4572.67	4207.33	4141.5	3782.33	3927.25	3073.5	2767.33	2247.75	2017.75	1516	1352	555.333	0	0	0	521.75	501.75	483	467.8	438.2	429.25	404.25	398	393.5	391	383.75	362.25	387.75	367.167	364.167	371.5	368.667	367.667	354.8	359.25	357.5	347.5
0	3600.5	0	0	0	0	0	0	0	0	3706.93	3391.5	2748.43	2508	2329.25	2049.17	1691.5	1614.33	1240.75	1009.5	855.833	689.25	558	500.25	346.6	0	0	0	396	405.5	404.25	412.5	394	385.6	371.75	385.2	362	350.333	358.667	360.167	362.667	340	329	334.25	340.75	343.5	331.333	335	334	332.75
0	1361	0	0	0	0	0	0	0	0	1264.57	1083.5	982.833	872	744.833	664.167	634.75	575.167	532.5	486.75	462.4	450.6	423.75	399.25	370.75	0	0	0	364	366	379.5	370.333	362.5	374.125	377.143	366.8	359.25	365.5	375.5	370.75	356.25	370.5	349.5	350.75	362.25	353.5	355.75	354	337	343.5
0	621.5	0	0	0	0	0	0	0	0	605.083	588.222	549.143	527.167	523	499.6	477	465.25	464.833	457	445	394.167	409.167	386.333	356	0	0	0	360.333	380.4	387.75	367.5	389.5	380	367.6	369.8	356.25	357.25	356.5	349.5	349.75	354	369	357.5	356	343.25	369	331	355.167	358.5
0	466.333	0	0	0	0	0	0	0	0	465.071	457.688	443.455	443.1	442.5	432.714	436.889	418.667	412.875	400	394.333	386.571	376.833	371.25	342.25	0	0	0	341	373	358	376.25	348	384.25	353.5	368.8	364.6	353.75	355.5	358.75	354.75	365.25	370	368	357.75	341.5	343.25	354.25	351.2	362.8
0	411	0	0	0	0	0	0	0	0	409.857	410.273	414.375	414.333	390.5	385.5	405.5	403	397.5	391	381.5	358.5	353.6	351.2	315.5	0	0	0	227.667	349	362	374	365.25	370.5	355.5	356.75	353.167	363	364	353.75	357.25	376.25	329.75	349.75	356.5	346.25	352.5	354.75	354.75	355.4
0	399	0	0	0	0	0	0	0	0	421	396.667	390.333	394	370.833	374.5	380.25	388	364	359.8	348.2	360.75	360.25	353.5	321.5	0	0	0	206.8	354.6	354.25	359	340.25	354.75	345	352	344.5	361.167	350.75	353.5	345	355.25	354.25	354.5	363.25	357.5	354.5	360.75	367.5	343.75
0	383.5	0	0	0	0	0	0	0	0	0	383.5	370.75	372	367	361.2	370.667	367.8	361.8	362.75	351.833	376.75	357.25	354.2	321.2	0	0	0	162.5	340	377.75	346	347.25	365.75	344.25	338.75	345.75	345.75	347.167	364.75	344.5	347	360	352	356.25	357	362	347	355	350.25
0	371	0	0	0	0	0	0	0	0	0	365.571	370.7	361.333	356.5	379.667	348.167	365	366.667	359.75	354.8	344.2	344.75	343	326	0	0	0	157.25	331.5	327	343.5	356.25	359.75	355.75	352.75	358.5	353	357.8	369	351.75	345.25	342.25	358	357.5	351	349.5	362	337.75	333.5
0	344.5	0	0	0	0	0	0	0	0	0	368.154	368.556	355.5	362.167	372.667	347	344.4	350.8	356.4	370.25	336	357	344.25	330	100.833	0	0	157.75	344.5	342.2	353.4	352.25	345	346.5	348.5	352.5	338.75	352.75	345.2	349.8	354.25	347.5	347.75	366.25	351.25	355.25	352.75	349.75	329.75
0	357.5	0	0	0	0	0	0	0	0	0	355.455	348.3	351.143	359.714	337.5	345.8	352.667	342.25	352	338	345.75	351	344	310.75	118.8	0	0	166.5	338	341.25	357.6	355.8	359.5	351.75	357.5	332	337	344.75	337.25	345	342.25	362.25	342.75	347.5	354	345.75	338.5	359.75	348
0	343.5	0	0	0	0	0	0	0	0	0	349.375	349.5	336.75	347	345.833	338.667	350	339	337.4	331.8	341.5	339.333	333	329.5	150.75	0	0	154.5	332	346	343	353	359.5	349.5	347.75	357	346.25	348.5	354.25	341.5	344.667	364.5	343.5	352.5	348.4	343.5	345.167	354.667	363.667
0	337	0	0	0	0	0	0	0	0	0	346	344.786	346.667	338.714	349.667	350.667	336.75	354.333	344.25	345.167	343.5	339.25	333.5	328.25	156.25	0	0	163.5	335.5	339.75	350.5	346	358.667	349.25	355.75	361.75	353.75	360.25	350	350	351	358.5	350.429	347.833	345.2	346.5	356.25	355.75	350.25
0	343	0	0	0	0	0	0	0	0	0	0	337.235	336.889	344	344.857	353.2	342.5	337.5	334.25	347.6	352.6	350.5	351.2	328	150.5	0	0	128.8	341.25	343.75	350	353.25	336.2	351.6	345.5	357.667	361.5	351.5	351.833	351	360.75	348.25	355.333	351.5	355.25	356.5	362	369	347.75
0	345	0	0	0	0	0	0	0	0	0	0	346.812	351.111	348.857	341.833	333.333	335.667	329.5	340	343	350.667	335.25	336.25	329	157.25	0	0	94	325.286	346.5	347.5	351.667	354.833	351.571	351.5	348.25	345.75	351	344.25	339.75	351.25	336	347.5	352	373	355.5	356	361.25	349.75
0	349.5	0	0	0	0	0	0	0	0	0	0	335.714	335.6	344.143	333.429	335.167	346.8	335.6	328.714	332.714	330.571	335.25	339.167	326.286	188.875	0	0	0	322.833	333.25	347.25	346.25	343	339.75	337	348.6	326	347.75	342	330.75	350.75	351	330.25	351	351.333	345.75	343.25	347.25	346.25
0	315	0	0	0	0	0	0	0	0	0	0	333.125	344.235	340.333	330.111	335	338.889	328.222	334.2	340.833	345	342.5	325.75	323	251.2	0	0	0	335	352.333	331.25	347	339	338.5	352.5	338	350.6	344	343.5	365.5	338.75	344.5	355	352.5	339	350.4	343.25	346.75	342.5
0	357	0	0	0	0	0	0	0	0	0	0	340.714	346.462	340.375	348.25	338.667	354.667	346.5	346.833	347.4	346.2	353.5	338.167	345.5	319.25	0	0	0	345.75	349	358.167	369	364.5	355	356.25	355.5	359.667	354.75	385.5	368.5	359.25	351.75	356.5	347.25	366.75	365	367.8	364.75	347.5
[truncated: 82 more columns]

## Sheet: Fig 2d
0	0	0	0	0	0	0	0	0	0	0	0	0	0	0	0	0	0	0	0	0	0	0	0	0	0	0	0	0	0	0	0	0	0	0	0	0	0	0	0	0	0	0	0	0	0	0	0	0	0
0	0	0	0	0	0	0	0	0	0	0	0	0	0	0	0	0	0	0	0	0	0	0	0	0	0	0	0	0	0	0	0	0	0	0	0	0	0	0	0	0	0	0	0	0	0	0	0	0	0
0	0	0	0	0	0	0	0	0	0	0	0	0	0	0	0	0	0	0	0	0	0	0	0	0	0	0	0	0	0	0	0	0	0	0	0	0	0	0	0	0	0	0	0	0	0	0	0	0	0
0	0	0	0	0	0	0	0	0	0	0	0	0	0	0	0	0	0	0	0	0	0	0	0	0	0	0	0	0	0	0	0	0	0	0	0	0	0	0	0	0	0	0	0	0	0	0	0	0	0
0	0	0	0	0	0	0	0	0	0	0	0	0	0	0	0	0	0	0	0	0	0	0	0	0	0	0	0	0	0	0	0	0	0	0	0	0	0	0	0	0	0	0	0	0	0	0	0	0	0
0	0	0	0	0	0	0	0	0	0	0	0	0	0	0	0	0	0	0	0	0	0	0	0	0	0	0	1	1	1	2.25	1.25	1	1.5	1	0.75	0.75	0.75	1.75	1.5	1	2.25	1.75	1.5	0.75	0.75	1.5	1.25	1.5	1.75
0	0	0	0	0	0	0	0	0	0	0	0	0	0	0	0	0	0	0	0	0	0	0	0	0	0	0	2	2.25	2.75	0.75	2.25	3	3	2.75	2.5	3	2.5	1.75	1.75	3	2.5	2.25	3	3.25	3	3.5	3.5	2.25	2.75
0	0	0	0	0	0	0	0	0	0	0	0	0	0	0	0	0	0	0	0	0	0	0	0	0	0	0	3	2.25	3	0.75	1.25	1.5	2	2	2.75	2	2.5	2	2.25	1.75	2.75	2.25	1.5	2.25	1.75	1.5	1.5	2	2.5
0	0	0	0	0	0	0	0	0	0	0	0	0	0	0	0	0	0	0	0	0	0	0	0	0	0	0	3	3	3	3	4	4.5	2.25	2.5	3	0.75	2	3	1.5	2.5	2	1.5	2	2	3.25	1.75	0.75	2.25	1.5
0	0	0	0	0	0	0	0	0	0	0	0	0	0	0	0	0	0	0	0	0	0	0	0	0	0	0	25	21.5	18	24.75	21	23.25	20.5	22.5	20	19.75	20.75	18.75	16.5	16	17.25	19.25	18.25	17.25	16.25	18.25	15.5	20.75	15.75
0	0	0	0	0	0	0	0	0	0	0	0	0	0	0	0	0	0	0	0	0	0	0	0	0	0	0	53.5	55.5	55	55.75	53.5	55	56	51.25	55	49	49.75	51.25	57.75	50.5	52.5	50.75	47	46.25	50.25	50	52.5	45.25	45.75
0	0	0	0	0	0	0	0	0	0	0	0	0	0	0	0	0	0	0	0	0	0	0	0	0	0	0	103.25	99.25	99.75	97	101.5	109.75	96.75	98.75	96.5	99.5	95.25	97.75	95.25	95.75	97.75	98.5	101.75	95	93.75	101	91.25	91.25	94
0	0	0	0	0	0	0	0	0	0	0	0	0	0	0	0	0	0	0	0	0	0	0	0	0	0	0	116.25	125.25	118.75	114.25	129.5	137.25	122.75	118	118.5	126	119.5	124	118.5	124.25	123.25	122.5	128.5	127.5	123.25	125.75	124.5	129.25	118
0	0	0	0	0	0	0	0	0	0	0	0	0	0	0	0	0	0	0	0	0	0	0	0	0	0	0	127	140.25	141.5	137.25	144.5	134.25	137.75	134.75	144.25	136.25	135.75	144.75	135.25	132.75	129.5	138	137.5	135.25	134	127.5	139.75	128.25	140
0	0	0	0	0	0	0	0	0	0	0	0	0	0	0	0	0	0	0	0	0	0	0	0	0	0	0	147.75	155.5	156.5	162.5	154.5	161.5	163	160.75	163	152	164.25	145.25	156.5	148.75	147.25	144.25	150.5	158	144.75	142.5	141.25	159.75	142.75
0	0	0	0	0	0	0	0	0	0	0	0	0	0	0	0	0	0	0	0	0	0	0	0	0	0	0	155.25	168	165.75	163.25	162	152.5	156	161	157	167.25	162.5	157	161.5	174.75	159.5	160	165.5	166.25	162.75	167.25	161	164.75	160.75
0	0	0	0	0	0	0	0	0	0	0	0	0	0	0	0	0	0	0	0	0	0	0	0	0	0	0	160.5	183.75	169.75	161.75	176	170	173.25	161	170	175.75	173.25	163.25	168	168.25	169.5	164.5	168.5	168.5	168.5	163	167	172.75	166.25
0	0	0	0	0	0	0	0	0	0	0	0	0	0	0	0	0	0	0	0	0	0	0	0	0	0	0	165.5	183	180.75	181	173.5	173.25	187	180.25	170.25	183.75	178.5	178.25	181.25	173.75	169.25	185.25	184.5	174.25	167.25	186.75	189	178	187.5
0	0	0	0	0	0	0	0	0	0	0	0	0	0	0	0	0	0	0	0	0	0	0	0	0	0	0	167.75	187.75	173.5	181.75	198.25	194	186.75	192.5	193.5	184.5	183	179.75	187.25	193.25	176.5	195.75	193.5	186.25	192.75	184	176.75	178	191.5
0	0	0	0	0	0	0	0	0	0	0	0	0	0	0	0	0	0	0	0	0	0	0	0	0	0	0	193.5	202.75	199	188.75	188.25	207.75	202	195.5	197.25	193.5	210	177.5	191.25	185.75	199.75	194.25	195	204.75	181	182.75	186.75	189.75	188.75
0	0	0	0	0	0	0	0	0	0	0	0	0	0	0	0	0	0	0	0	0	0	0	0	0	0	0	180.75	191	184.5	186.5	194.75	187	192.25	203	205	192.75	181.75	197.75	190.75	194.25	199.75	199.75	182.5	189.75	194.5	196.75	197.75	192	182.25
452	709.5	592.75	403.25	335.5	285.5	257	243	228.5	218.5	199	206	203.25	200.75	203	198.25	195.5	194.4	186	187.5	189.5	184.75	167	0	0	0	85.25	190.25	188.75	194.5	191	199.5	193	195.75	198.75	201.25	196.75	193.5	196.25	199.5	201.25	194	199	200	200.75	194.25	201.25	193	201.5	191.5
451.25	590.5	543.25	390.75	329.25	294.25	270	246.75	236	224.25	226.25	227.5	209.5	210.25	211.5	212	204.75	197.5	195	192.75	202	200	177.5	0	0	0	90.25	196.75	200.5	208	207.25	209.25	203	212	214.5	200.25	205	207	212	201.75	201.5	201	199	205	204.25	202.5	209.75	201.25	204.5	214.5
412.25	541	491	389.5	333.5	302.25	293	243	237.75	227	218.75	219.75	222.5	210.75	221.5	216.75	209.25	215.5	211	208.75	204.5	208.25	180.25	0	0	0	93.5	198.5	205.5	209.5	215	222.75	213.75	211.5	209.25	211	216.75	213.75	204.75	198.5	206.5	214.75	213.25	212.75	209.5	208.5	207.25	208	204.25	195.25
409.75	531	470.5	370.5	310.25	287	273.75	261.5	228.75	233.25	235.25	252.5	217.75	223	213	230.25	221.25	214.25	209.333	223.25	219.75	213.5	196.75	0	0	0	93.75	206	218.25	222.25	197.75	215.5	207.25	219.5	215.75	211	217.75	209	210.5	206.25	211	203.75	208	212	213.5	212.75	209	220.75	215.25	216.75
373.75	436	430.25	328.25	314.5	279.75	261.75	256.75	241.25	249.25	229.25	241.75	214.5	238	225	223	211.75	225	210	213.5	225	213	204	0	0	0	93.5	210.75	219.5	220.25	218	211.5	215.5	203.25	223.75	216.5	219.75	219.25	222	216.5	223	213.5	210.25	214.75	223.25	221.75	219	231.75	215	200
353.5	440	380	331.5	312	284.25	275.25	254.25	255.5	244.75	229	224.5	232.5	235.25	222.25	211	229	222	225.833	207.75	227	200.25	203.5	0	0	0	96.25	199.75	215.25	221.5	209.5	217.25	229.75	222.25	217.75	213.75	220.5	214.25	213.5	222.5	219.75	212.25	213	218.25	217.5	206	215.25	211.25	207.75	209.25
362.5	422	385.75	328	306.5	291.75	253.5	263.75	259.75	233.75	234.75	228.75	228.25	232	229.75	237.25	231.5	211.75	230.333	222	234.5	225.5	203.5	0	0	0	107	217	215	221	216.5	226.25	232.25	228.5	239	229	215	216.25	222.5	231.75	241.5	229.5	238.75	217.75	233.5	221	221.75	223.5	219.5	207
345.75	371	347	326.75	299	267.5	259	256.75	258.5	238	248	236.25	230.75	233.75	243.5	239	226.75	240	229	218.5	222.75	216	207.75	0	0	0	98.75	225.5	235	229.25	224.5	240.5	229.5	225.25	235.75	225	226.75	212.75	216.5	217.25	229.5	228.5	229.75	215.5	222	215.5	232.25	218.5	224.75	226.5
322.25	397.5	377.5	331	296.5	278	280	269.5	264	241.5	245	250.25	238.25	227	232	234.5	216	235	237.25	219.333	230.5	215.75	208	0	0	0	109.5	223.25	214	235.75	233.5	227.5	237.25	233	218.75	226.25	233.5	225	234.25	234.75	236.25	241.5	231.5	225.75	223.75	232.75	230.5	228	219.5	227.75
312.75	351.5	337.5	309.75	287.5	273	267.75	264.5	258.25	239	244.25	248.5	238.5	230	241	240.5	224.5	239.75	237.5	227.667	249.25	226.75	205.25	0	0	0	104	220.75	212.25	213.75	217.25	235.25	250.75	245.75	230.75	232	228.25	237.5	238.25	222	239.25	244.25	246.5	227	240.25	236.75	249.5	238.25	232	235.75
304.5	358	331	286.25	281.25	264.5	257.75	262	252	248.25	238.5	243.25	261.75	256.25	254.25	244.5	233.25	248.25	235	231.167	225.75	220.75	210.25	0	0	0	96.75	215	221	236.5	240.25	236.5	218.75	235.5	238.5	233	221	234.75	236.25	242.75	232	237.25	236.5	234.75	248.75	240	230.25	244.75	240	225
296.5	310.5	336.75	291.25	270.75	282.25	263.5	252.25	252.25	253.5	248.75	254.25	228.5	250.5	255.5	239.75	255.5	250.75	243	236.25	225.167	228.75	213.75	0	0	0	104.75	231	236.25	243.75	235	239	246.5	240.75	245.25	238.75	245.25	239.75	238.5	234	242.5	213.25	241.25	240.75	251	234.5	238	254.25	234.5	235
303	332	323.5	300.5	282.25	271.75	266.25	265.75	275.75	246.75	262.75	250	249.5	246.25	255.25	245	236.75	265	240	238.75	233.5	240.5	223.75	0	0	0	110	240	242.5	226.5	238.5	235.25	240.75	240	242.5	241.75	244.25	224	252.25	253	241.5	232.5	232.25	241	251.5	241.5	246.25	227.5	238.5	242.25
304.5	287.5	310	287.5	286.25	280.25	273	259.75	256.25	242	240.25	250.25	252	252	243.25	245	229.25	243.5	244.25	244	238.333	242	213	0	0	0	105.75	220	247.75	256.5	251.5	253.25	246.75	243.25	245.25	240	239.5	247	241.75	236.5	241	238	234.25	244.25	244.75	262.5	235.25	239	239.8	235.167
282.5	299.5	301.75	287.25	265.5	267.25	255.5	247.5	261.25	256.75	256.75	253.75	259	248.75	243.5	233	235.25	235.5	247.5	245	244.25	229.5	212.5	0	0	0	107.5	223.5	235.75	226.5	248.5	234.5	245.75	227.75	235.25	242.5	252.75	234	234.5	242	235.25	227.75	240	240.25	240.5	236.75	233.167	230.833	236.8	236
292.5	294	285.5	288	271.25	270.75	268.25	257	252.5	248.5	245.5	247.25	244.75	234	241.25	241.25	235.25	240.25	238.75	236.75	241	230.667	205.5	0	0	0	104.5	220.25	232.75	229.25	236.5	238.25	225.25	241.5	237.25	227.75	239.75	233.5	231.5	245.5	239.25	250	242.75	231.4	242	246	238.25	241.75	236	244.25
287.5	299	292.5	296	276.5	267.5	273.75	258	261.75	248.5	259	252.25	253.5	255	238.25	244	240.25	249	252.25	243.25	246	241.8	217	0	0	0	105.5	228.25	228	246	244.25	246	247.25	242.75	230.25	239.25	254.5	245	247	244	236.75	251.167	249.5	241.8	244	241.5	250.5	255	239.75	254
285.25	309	296.75	275.5	270.25	262.75	266.25	253.75	247.75	252.75	261	246	248	250.75	246.25	242.75	248	245.25	250.25	243.75	247.75	246.25	225.667	0	0	0	114.25	236.25	241.5	252.75	239.75	255.5	235	244	254.5	245.25	251.5	249.75	246.4	255.333	247.833	257.75	253	250.75	249.25	253.75	249.25	249.5	242.75	250
291.25	302.5	281.5	276.5	272	266.5	265.25	266.25	261	262.75	264	253	262	259.75	255.25	256	250.5	249.75	243.25	238.5	251.75	251.5	229.167	0	0	0	114.25	231.5	243.5	248	256.25	252	253.75	257.75	247	246.6	250.5	254.333	255.6	257.75	242.75	249	249.75	251	255.25	244.75	247.75	258.25	247.75	252.75
280.75	284	276.25	274.5	265.5	279.25	271	257.5	260.75	251.5	265.25	252.5	254.25	250.25	259	259.5	254.25	244.75	261.5	247.75	244.75	245.75	235.25	71.8333	0	0	113.25	241.5	247	259.5	251.75	251.75	254.8	250.333	257.333	253	255.5	253	256.5	245.5	252.5	258	254.75	250.25	241.75	246.25	257.25	252.75	249	267.25
268.5	284	272.25	282	267	270.25	264.5	253.5	261.5	262.75	253.5	269.25	252.5	264.25	251	258	256.75	261.25	245.5	248.25	255.25	248.5	239.25	70.6667	0	0	114	248.75	253	255.6	254.833	254.833	252.6	256	263	250	251	250.25	248.25	256.25	247.75	247	254.75	248.25	244.75	261.75	248.5	255.75	252.5	259.5
282.75	287.5	271.333	273.2	275	274	266.75	260.5	253.5	253.5	267.75	255.25	253.75	265	258.5	254.75	246.75	257.5	249.25	260.5	246.5	246.25	234.25	107.5	0	0	110.333	247.5	244.833	261.6	253.75	253.5	257.5	257.75	255.5	255.5	260	262.5	257	256.25	255.5	257.25	261.5	258.25	271	259.25	253.75	250.75	252.25	264.75
279.333	283	275	284.333	279.75	267	264.25	255	261.75	256.5	262.75	260.75	256	267.25	255	262	249.5	255.25	265.5	257.5	256	255.5	235.667	105.5	0	0	109.25	246.75	245	248.25	257	260.25	256	254	259.5	258.5	247	255	252.5	272.75	260	257.75	260.75	260.5	254.5	251.5	259.25	272.5	269.75	264.5
269.5	277	276	275.5	267.5	268.25	273.75	259	267	264.75	254.25	268.5	252.75	258.5	266.75	263	245.6	254.667	259.833	258.333	246.333	249	232.5	107	0	0	113.25	243	251.75	251.25	261.5	256.25	268.25	270.5	270.25	258.5	253.25	258	260	258.5	242.75	262.75	254.25	263.25	260.75	260	257.25	263	255.75	261
255.5	279	278.5	275	261.25	264	268.25	255.75	265.5	266.167	260.5	261	248.833	264.667	262	257	256.4	259	260.25	257.25	246.5	263.5	233.75	110.5	0	0	114.5	252.5	250.75	257.75	271	264.25	260	264	251	260.25	273.5	252.25	260.75	268	257.5	265.25	260.75	263.25	260.25	258.25	260.25	261.5	261	261.25
275.333	286	272	274.222	273.333	280.5	265.833	253.667	260.75	260	265.25	260	261.5	259.25	261.25	252.75	248	264.25	255	249.25	254.75	256	249.75	109.5	0	0	76.1667	252.5	265.25	260.75	263.75	247.5	261.75	266.75	266.75	269	252.25	261	270.5	261.75	264.25	256.75	251	262	257.25	257.25	253	259.5	249.75	265.5
285	272	0	270.875	269	267	276.75	262.5	265.25	258	273	262.5	264.75	258.5	256.75	256	271.75	256.75	266	255.75	263	261.25	239.75	112	0	0	77.6667	249.25	256.5	259	268.75	272.25	268.25	265.25	258	266.75	271	262.25	257.75	264	258.25	266.25	262.25	255	267.75	261.25	270.5	259.25	261.25	251
0	276.5	0	268	270.2	260	270.25	266.5	272.75	254	271.75	263.5	254.75	262.5	269.5	263.75	267	255.5	264.25	259.25	251	257	259.5	110.5	0	0	0	245.833	270.75	269	269.5	267.5	252.25	257	261.75	253.75	257.75	263.5	249.5	259	265.75	267.75	266.25	272	271.75	266.25	261.25	267.5	267	274
0	275	0	272.333	273.333	271.25	282	266.75	268.75	267.25	266.75	263	267	268	262.25	265	264.75	250.25	261.75	278	266.5	255.75	240	108	0	0	0	251.333	263.75	281.25	270.5	266	267	267.75	267.5	265.75	268.25	269	260.5	271.25	273	268.5	270.5	266	272.75	260.5	279.75	269	264.5	264.75
0	264	0	267.5	270.833	268.75	264	274.5	270.5	269.75	267	265.75	267	267.75	275	264.25	258.75	260.5	273.5	271.5	254	262.75	250.75	102	0	0	0	240.75	258.333	261.25	272.75	274.5	277.25	276.5	260.75	271.75	268	280.25	271.25	262	272.75	271.25	263.5	271.25	278	260	265.75	274.25	267.5	259
0	262	0	276.5	275	273.5	282.25	278.25	267.25	264.75	278.25	273.75	270.25	263.5	263	266.25	271	272	257.75	254	263.25	268.5	249	118.25	0	0	0	240.75	263.167	261.5	268.5	268.5	256	273.5	274.25	270.25	268.75	269.75	274	270.5	267.25	277.5	256.25	270	266.75	268.75	259.25	266.25	266.25	272.5
0	284	0	277.833	272.167	278.75	271.5	279.75	272.25	264.5	269.5	274	273.5	269.75	264.25	265	263	267.25	268.5	261	270.5	259.25	250.5	114.25	0	0	0	241.75	263.5	270.667	262.75	274.5	280.5	289.5	279.5	269	275.5	271.5	270.75	268	277.75	273.75	272.75	277	278.25	276.25	274	270.5	276.5	277
0	275.5	0	281.333	269.75	282	268.25	274.75	281.75	274.75	275	266.25	265.75	275.5	268.25	275.25	275	265.5	268.25	261.25	266	260.25	250.75	114.75	0	0	0	247.5	257.5	266.2	262.4	271.25	278.5	276.75	270.25	270	274.5	270	281.25	265.75	281.75	263.75	262.25	264.5	267.75	271	272.75	269.75	267.5	275
0	279.5	0	283.167	271.5	268.5	265.5	268.75	272.5	272	277	272.5	261.25	252.5	271	263	258	273	272.75	265.25	255	265	252	118.25	0	0	0	242.25	265.25	270.25	277.667	262.5	265.75	263	266.75	282.25	272	277	259.5	285.75	272.75	277	262.5	273.25	271.5	270.5	272.75	277	277.75	274
0	278	0	276.5	281.5	279	274.75	276.75	276.25	263.25	276	271.25	269.25	279	274.75	271	272.25	269.75	271.25	261.5	252.25	265.75	251.75	115	0	0	0	253	264.75	277.5	276.2	267.8	281	275.25	279.75	271.75	270.25	270.5	273.75	273.25	267	276	270.75	274	272.5	275.5	283.25	273.75	275	269.75
0	271.5	0	278.5	270.667	281.5	276	270.25	276.5	276	274	278.25	282	277.25	270.75	267.5	274.25	265.75	263.75	252.5	264.5	262.5	254	119.25	0	0	0	247.25	280	268.75	278.25	269.167	274.5	277	269.5	281.5	279.75	272.75	276.5	268.75	279.25	283.5	277.5	268.5	265.5	276.75	277	278.75	274.75	276
0	279.5	0	280.25	281.833	278.75	281.667	263	263.25	266	271.25	278.25	273.25	274.5	268.25	266.25	275.75	272.75	261.25	266	266.5	263.25	250.5	112	0	0	0	252	264.75	276.5	276.75	274	279.6	292.25	273.5	277.25	262.75	274.75	277.5	285.75	278.75	265	277.5	271	274.75	271.25	280.5	270.75	266.25	274.25
0	282	0	273.75	279.833	271.25	289	272.5	291	265.25	275.5	263.75	267.75	274	272.5	267.25	272.5	259.25	272.5	256.75	262.5	270.5	247.75	114	0	0	0	259	269.25	282.5	281	274.5	287.333	283	279	276.25	274.5	269.25	279	289.5	267.5	270.25	264.5	285.25	281.25	276.5	275.25	280.5	277	266.75
0	281	0	274.25	277.333	273.25	279.667	277.25	257	278.25	278	280	275.5	277.75	279.75	277.5	257.5	271.25	274.25	266.5	268.25	258.25	258	111.75	0	0	0	250.5	281	273	278.25	280	274.6	279.8	281	279.5	282.5	264.75	281	266	283.5	270.75	267.5	279.75	270	272.5	281	273	276	279.5
0	278.5	0	269	273.125	283.5	261.75	274.5	282.25	279	266	271.75	269.25	273.5	276.5	285.25	278.25	272.75	268.5	269.5	270.75	260.25	266	120.75	0	0	0	253.25	279.5	273.25	290.75	276.25	278.75	280	280.25	287.5	280.5	278.5	274.75	272	294.25	277.25	285.25	278	286.75	279.5	279.25	276.75	275	281.5
0	277	0	262.5	275	280.25	277.25	273.5	281.25	273.5	278.25	277.25	281.5	273.25	263.75	281.75	284.5	257.75	276.75	271.75	270.25	277	261.25	116.25	0	0	0	253	270.5	280.75	283.5	273	278.5	281	281.167	281.5	276.5	289	278.5	279.25	292.5	292.25	273.25	276.5	299.25	284.75	279.5	283.25	283	277.75
0	270	0	0	286.5	277.833	275.25	269.8	272.2	274	280.25	271	269	278	278	266.25	274.25	281.75	284.75	275	259	271.25	255.75	120.5	0	0	0	256.75	277.75	276.25	275.25	290.75	277.5	276	287.333	280	280	279	275.75	276.25	273.75	283.5	279.25	286.75	284.75	284.75	287.5	281.25	277.75	281.25
0	282.5	0	0	284.25	276	285.25	278.5	268	274.25	275.5	272.75	275.5	281.5	272.75	288.75	283	269	268.75	270.5	255.25	279.25	257.25	116.5	0	0	0	246.25	274.75	285.75	290.5	280	282.75	276.75	282.75	273.333	291.25	278	282.25	286.25	276.25	275.5	288	276	284	290	311.75	292.5	277.25	291.25
0	280	0	0	288.75	282.333	283.25	273.25	275	261.75	270.75	283	281.5	275	280	277.5	258	274	272.5	268	271.25	264.75	257.5	117.75	0	0	0	257.75	285	294	287.75	291	288.25	278.5	284.5	284.333	281	287	290.25	293	296.75	279.5	291.25	290	287.25	282	287	274	286.25	285.25
0	274.5	0	0	284.625	280.167	274.75	277.75	290.25	274.833	283	272.25	285.25	285.75	287	282	278	268.5	275.75	280.75	269	275.25	256.75	115	0	0	0	252	278	286.25	285	280.75	289	282	281.25	280	281.667	290	286	281.5	283.75	280.25	304.75	300.5	295.75	288.25	292.75	284.75	286.5	282.5
0	280	0	0	281.375	276.8	286.4	273.25	269.75	272.5	271	289.5	278.25	274.25	282.75	288.75	288	270.25	265.5	278.75	280.5	258.75	269.5	121.25	0	0	0	249	278.5	279.75	294	274.25	290.75	294.25	287	290	289.6	295.2	285.75	286.75	274.5	284.5	284.5	287.75	281.75	291.75	277	285.75	284.25	291
0	272.5	0	0	286.5	284.833	282.833	272	282.5	270.8	269	286	275.5	280.25	271.5	282	272	281	286	272.75	275.5	271	258.75	123.25	0	0	0	261.25	274	288.5	276.5	291.5	296.5	286	297.25	280	282.75	285.333	292.5	279.25	284	283.25	289.75	298.75	289.75	292.75	296.5	291.75	285	286.5
0	287.5	0	0	273.167	287.167	285.5	285.75	282.5	275.75	276.333	271.75	276.75	283.25	277.25	275.5	277.75	271.75	290.5	278.5	273.75	271	267.75	114.25	0	0	0	256	265	277.25	288.75	278.5	288.25	276.75	283.25	282	292.5	283.4	294	295.5	289	287.5	292	283.75	289.75	277.75	290.75	289.5	292.5	289.75
0	276	0	0	288.5	277.333	280.667	279.25	280.5	287.25	278.4	280	275.5	289	277.75	274.5	272.75	281.25	293	278.75	276.75	281	274.75	122.5	0	0	0	259	289	284.25	292.75	293	287.5	279	284	282.25	302	297.5	292.167	294.5	291.75	288.75	295.75	291.75	295.25	285.5	306	294.25	288.75	296.75
0	293.5	0	0	286	286	280.6	276.6	276.5	278	281	284.833	285.75	289.5	274	282.5	283	271.25	291.5	283.5	261.25	279	259.5	124.75	0	0	0	274.5	280	289.25	292.75	284.25	284.5	285.75	284.5	295.75	291.25	292.25	284.25	285.833	297.75	297.25	305.25	287.75	295	295.75	288.5	291.75	293	298.25
0	288.5	0	0	293.25	289.125	283	288.333	277.5	286.5	277	292.2	281.6	277.25	293.75	278	283	281.25	280.75	277	279.75	272.5	264.5	119.5	0	0	0	263.5	286.75	286.75	290	286.75	283.75	285.75	298.75	282.5	301.75	293.5	286.75	290.833	286.75	301.5	284.25	296.5	281.75	291.25	292.75	292.75	295.25	299.5
0	267	0	0	279	291.375	282.4	292.5	290.5	281.75	278	274.75	283.833	299	287.75	277	281.5	276.75	296.25	286.5	277	278	258.25	118.5	0	0	0	278.5	285.25	287	292.75	293.5	303	293.5	292.25	286.75	291.5	301.25	303.25	294.25	288.833	288.5	297.75	311	282	295.25	290.75	299	300.75	303.5
0	281.5	0	0	285	283.667	282.167	283.333	282	276.25	282	284.25	288	285.2	292.5	280.25	280.75	290.25	274.25	285.5	276.25	275	256.75	121.75	0	0	0	263.75	289.25	297.25	289.25	295	301	287	304.75	291.75	282	307	294.25	294	291.6	296.8	303	300	298.25	297.25	297.75	291.25	299.5	292.75
0	298.5	0	0	0	287.8	286.667	292	280.5	301.25	292.5	280.25	279	286.833	294.25	285	294.25	284.25	274.25	279.75	284.5	278.5	273.5	125.5	0	0	0	267.75	285.75	293	301.75	299.5	290.5	298.25	299.75	295.75	290.75	292.25	288.5	298.75	297.5	302.667	294	288	295.5	296.75	303.25	298.5	296.75	293.25
0	297	0	0	0	289.4	287.667	293	287.167	281.75	284.75	292	289.5	295.5	280.833	275.5	282.5	297	288.75	297.25	313	282.25	280.75	122.75	0	0	0	265.25	280	289.75	293.5	297.5	303.5	284.75	296.75	309.5	290.25	304	312.5	298.5	301	294	299.6	312.5	294	298.25	303.25	288.75	304.25	302
0	270.5	0	0	0	287.444	296.571	284.75	289.333	286.75	291.25	298.75	280.75	277.75	287.6	284	291.75	291.25	276.5	300	285.25	285.75	271.75	124.25	0	0	0	278	289	293.5	298.75	296.5	304.25	312.25	288.25	303.25	307.5	299.5	300.75	301.5	304.5	295	303	319.25	312.25	300.75	286	300.2	301.333	295
0	307.5	0	0	0	283.375	300.833	293.167	284	285.333	298	293.25	283.75	288.5	292.75	275.5	278.75	290	285.5	291.75	293	279	275.75	127.25	0	0	0	263.5	302	298.25	306.5	315.25	302.5	299.5	308.25	295	297.25	298.75	308.5	295.5	310.25	292.75	299.75	307	306.2	290	311.5	308.8	312	310.25
0	302.5	0	0	0	296	286.5	295	303.5	296.5	284.75	292.5	282.5	295	293	301.4	291.4	294.5	287.25	285.75	284.25	280.25	281	122	0	0	0	273.75	280	294.25	291.75	299	304	294.25	299	308.5	306.5	297.5	311.5	289.25	304.5	300.4	312.5	295	303.667	297.25	305.25	302.5	310.75	309.25
0	292.5	0	0	0	295.857	297	303.167	305	290.8	301.8	291.5	295.5	286	285.75	292.25	288.5	295	290.25	297.75	284.25	289	278.75	122.75	0	0	0	270.75	297.5	306.5	302.25	288.75	298.25	299.5	295.25	289	315.25	307.5	304.5	301	300.333	295.8	311	310.75	306	301.25	302.75	307.75	304.25	319.5
0	299	0	0	0	303	302.125	294.833	300	293.5	291.667	292.75	290	303	292.5	294.5	298.25	292.167	278.5	287.75	283.5	299.25	282	122.25	0	0	0	285	290.75	301.25	297.25	294.25	300.25	311	296.667	303	295.833	306.833	307.5	321.5	312.5	297.5	306.25	309	308.25	312.333	307.5	311.5	315.5	313.5
0	299.5	0	0	0	297.2	297.5	286.4	291.667	296.75	296.333	291	294	290.75	301.5	299.5	295.75	291.2	302.2	285.25	300.75	288.5	274.75	122.75	0	0	0	272.5	295.5	308	301	300.667	299.333	304.6	301.25	313.5	301.5	312	299.5	309.75	304.75	324.25	310.25	303	319.5	317.333	299.75	312.25	312.75	330
0	313	0	0	0	299.25	293.5	295.833	294.667	302	292.75	290.5	300	299	294.25	285.5	286.25	287	302.6	289.8	303.5	289	269.5	126.5	0	0	0	277.667	293.5	304.25	298.75	307.25	311.75	298.75	300.5	307.75	305.75	310.75	305.5	300.25	301.5	315.25	311	314.25	319	318	316	313	321.75	316.75
0	301	0	0	0	292	293.636	301.833	290.833	288.25	303.5	291.333	305.5	294	300.25	289	296.333	304.667	293.833	293.25	292.857	280.5	276.5	127.25	0	0	0	280.75	303.25	293.5	296	308.25	302.5	307	300.75	301.75	296.25	308.5	312	305.5	304.25	306.25	310.75	309.25	305.25	318.25	327.6	315.8	316.25	330.5
0	299	0	0	0	0	300.529	296.6	291.833	294.222	304.667	297.167	294.333	298	299.167	288.667	289.5	303.5	295.25	290	300.833	302.75	284.5	129.25	0	0	0	280	303.75	301.5	309.75	297.75	299	310	315.25	301.75	320	314	312.75	302.25	318.5	318	317	319.25	320.25	319.75	321	328.667	326.75	324.5
0	304	0	0	0	0	310.6	309.143	303.8	299.5	292	302.75	308	293.75	298	296.25	291.5	300	302.25	304	302.5	299.5	280.75	127.75	0	0	0	264.25	303.5	303.25	304.5	314.25	315.75	322.5	320.5	313.5	319.5	303.75	303	312.75	317.25	320.5	312	312.75	329.75	338	328.75	308.4	303.4	334.25
0	307.5	0	0	0	0	298.9	299.167	311.667	304.8	304.8	300.75	317	299	309.5	298.25	302.75	300.25	297.25	291	308.5	293.8	287.8	129.75	0	0	0	282.25	299	303	314	311.5	310.75	312.75	315.25	323.5	316.75	309.25	315.75	319.25	306.5	332.75	309.5	340.5	316.5	337.75	323.5	325	329.5	322.75
0	309	0	0	0	0	311.875	306.875	297.667	301.75	299.833	303.25	307.75	308.167	317.75	301	297.5	304.5	304.25	302.5	303	295.25	301	158.6	0	0	0	283.75	311	308.25	318.5	312.25	310.5	316.75	313	319.75	324.75	310.25	334.25	322.5	328.25	330	333.5	314.25	335.5	341	328	326.75	334	334.833
0	314	0	0	0	0	303.125	305.375	307.167	301.5	316.667	304.5	301.75	307	312.167	299.75	312	316.5	298.25	293.5	311.5	302.5	285.25	178.5	0	0	0	290	302	311.25	318.5	315.25	314.75	321	322.25	321.25	330.25	307.75	327.75	335	344.5	316.75	329.75	330	341.75	324.25	334	333	322	345.5
0	325.5	0	0	0	0	309.167	307.125	311.667	320.833	297	311.6	303.75	305	308.667	307.25	311.25	302.5	309.5	300.75	297.5	302	303	262.75	0	0	0	289	312.25	304.25	314.5	313.25	326.5	327.25	334.25	325.25	328	329.75	341.75	323.25	319.25	321	319.75	324.25	333	330.5	331.25	337.5	332.5	351.75
0	314	0	0	0	0	307.6	308.778	308.167	315.667	310.75	313	308.75	315.75	313.75	308.333	319.75	303.25	306	306.75	299.5	305.5	289.75	275	0	0	0	289.75	310	344.75	329	333.5	330	332	334.5	330.75	332.5	336.25	336.75	321	328.75	328.5	327.75	321.25	331.25	343	344.5	388	402.25	405
0	300	0	0	0	0	316.333	311.636	308.667	313.167	316.25	312.833	306.75	321.5	322	309.4	312.2	315.25	310.5	304.75	298.5	302.5	310.5	285.75	0	0	0	296.75	310.75	330	328.75	336.75	323.75	325.5	329	331.5	336.5	319	332.75	330.5	329.75	338.75	341.25	341	353.5	387.25	443.75	441	459	435.25
0	321	0	0	0	0	0	320.5	305.25	311.4	313.8	309.75	317.167	323	322.25	352	387.833	315.75	332.5	316.5	301.5	312.25	325.75	363.5	0	0	0	302	320.75	328	335.5	335.5	331	323.75	329	325.25	325.25	326.75	328	337.25	335.25	342.75	393	403.25	407.25	487	462.5	436.25	431	363.5
0	330.5	0	0	0	0	0	331.583	329.167	351.5	339	326.25	450.167	463.5	370	428.25	442.2	354.4	385.25	594.25	352.5	325.5	327.25	387.75	0	0	0	201	322.25	336.5	324.75	326	346.25	330.25	334.75	328.75	325.5	338.25	335.5	337.5	378.25	403.25	452.25	450.5	448.75	463.75	449.75	373.75	353.75	334
0	403	0	0	0	0	0	354.727	508.714	405.833	440.667	350.75	586.4	557.2	374.25	464.75	555.5	368.667	396	557.5	381	321.75	335	320	0	0	0	147.5	313.333	339	323.75	327	329.5	344	343.75	349.25	362.25	370.5	396.5	420.75	475.75	462.75	461.75	451.25	400.5	372	351.75	332.25	329.5	341.75
0	402	0	0	0	0	0	381.6	516.875	406.833	408.4	365.8	409.75	389.333	345.5	355	369	354.75	346.667	352.75	323.5	323.25	305.5	288.5	0	0	0	148.75	327.25	343.667	333.5	338.25	353	354.25	369.5	414	447	472.25	479.25	476	467	432.5	412.75	369.25	346.5	360	339.5	336.5	336.5	346.25
0	360.5	0	0	0	0	0	378.333	401.25	370.286	362.5	350.333	345.25	339.6	343.4	340	345	329	326.6	335.4	331.75	324.75	326.5	307.25	0	0	0	152	329.5	348.4	372.4	385.75	419.75	468	508.5	502.5	539.5	543	530.75	474.75	393	369.75	354	349.25	339.5	336	337.25	336	349.25	352.25
0	367	0	0	0	0	0	355.75	355.5	345.667	353	346.667	329.75	354	347	339.5	337.5	323	342.5	335.167	344.25	332	348	308.5	0	0	0	178	372.5	434.75	467.2	529	536	551.75	610	575.5	522.75	441.5	377.5	353.75	340	350.75	328	341.25	331.5	340.75	349.25	345.75	343.6	340
0	358	0	0	0	0	0	363.833	367.2	362.833	358	362.25	357	377.25	355.4	349.8	363.5	356	352	359.4	378.8	388	399.75	396.25	0	0	0	239.25	545.75	597.5	590.5	643.833	581.25	569	489.5	405.75	380.25	362.25	350.25	336.75	340	323.25	349.5	355.75	346	342.5	335.667	340.833	356.2	348.25
0	414	0	0	0	0	0	422.5	405	405.143	394	389.75	402	415.25	404.75	422.5	445.25	469.5	490.5	485	568.5	603.25	628.25	626.25	0	0	0	321.25	675.5	661.5	544.25	549.25	448.5	393.25	352.75	345.75	335.25	343	346.5	349.5	340.4	331	343.333	347.833	339.5	350.25	345.5	342.75	358.75	360.75
0	636.5	0	0	0	0	0	516	660.462	606.286	660.8	639.833	634.4	733.6	744	765.6	835.6	845.5	880	878.25	922.25	915.667	849.5	739.75	0	0	0	298	524.75	452.75	389	363.25	356	355.167	344.5	341.25	344.667	345.833	352	328	340.4	346.5	355.25	340.25	348.75	340.75	362.75	349.75	360.75	360.5
0	1729	0	0	0	0	0	0	1642.08	1497.57	1424.5	1351.5	1273.5	1289.67	1309.75	1278.75	1230.67	1143.25	1214	1075.75	968.5	868.4	640.8	492	0	0	0	170	340.5	352	352	341.8	343.333	340.143	352.75	348.5	335	337.75	345.5	346.25	350	351.25	342.5	361.25	358.5	365	355.75	368.5	375.5	374.5
0	2551.5	0	0	0	0	0	0	2451	2101.38	1896	1780.33	1530	1464.83	1324	1148.25	1071.6	787.4	795.75	612	494.25	434.75	376.167	325.75	0	0	0	153.167	334.167	337	339.333	348.4	343.5	354.75	355	343.333	342.75	349.75	337.5	364.75	355.25	366.5	353.5	361.5	368.5	365.5	377.75	383	375.25	413.25
0	1579.5	0	0	0	0	0	0	1617.18	1301.38	1051.86	933.75	785.333	687.25	595.5	530.25	458.4	406.556	386.167	370.333	350	355.5	338	316.875	41.5714	0	0	149.75	319.5	347.25	344.75	350	351	352.75	359.75	360.25	361.333	352	354.75	355.75	358.25	367.5	370.75	377.25	371.5	369.5	393.25	397.75	451	576.75
0	502	0	0	0	0	0	0	499.643	470.769	445.889	416.444	398.333	373	369.667	368.5	365.6	353.5	353	346.5	349.75	347.25	335.25	320.75	98.6667	0	0	155.25	345.5	345.75	357.25	350.5	357.75	364.5	356.75	350.5	360.6	360.6	365.75	381.25	373.75	381	360.5	395.75	406.25	426.5	455.25	641.5	999.75	1522
0	379.5	0	0	0	0	0	0	369.857	375.9	373.143	360.833	350.8	358.6	368.5	358.667	351.5	354.25	364.5	347	356	343.25	338.75	331	145	0	0	159	331.25	345.5	348.75	353.75	346.5	364.75	361.5	358.25	367.5	364.8	374.2	381	371	390.5	412.5	438.5	508.75	745.25	1020.5	1999.75	2073.25	1731.5
0	366	0	0	0	0	0	0	358	363.455	363.857	358.5	367	356.333	358.25	342.5	341	353	342.25	350.5	341.75	343.75	351.25	334	151.5	0	0	154.25	336.75	348.75	360.75	348.75	362	359.75	367.25	374.25	364	391.5	375	402.2	419	466.25	684.75	1000.5	1210.25	1857.5	1941.5	2155	2790	2383
0	377.5	0	0	0	0	0	0	371	360.429	370.714	357.833	358.667	357	367.25	347	351	355.5	350.75	351.8	357	358.75	352.25	339.25	149.75	0	0	153.75	348	351.25	365.25	377.5	376	379	391.25	385.5	401.75	420.5	429.5	535.5	730.5	1159	1355	1896.25	2765.25	2620.75	2197	1706.75	1774.5	934.25
0	378	0	0	0	0	0	0	0	366.714	370.875	367.333	361.833	363.25	372.167	367	355.667	363.5	366.75	355.5	344.333	359.25	362.5	334.5	155.75	0	0	107.667	361.5	375.5	381.75	377	399.75	413.75	413.25	433.75	490.5	742.75	1041.5	1334.5	1768.17	2237	1844.25	2504.25	2549.75	1822.75	1085.25	625	537.25	409.75
0	370.5	0	0	0	0	0	0	0	369.077	377.75	373	370.2	374	370.5	371.25	369.5	361.833	373.75	374.25	366.25	364.167	370.75	344.75	152.75	0	0	0	345.833	394	398.75	428	436.75	534.25	716	948	1131.5	1676.5	2529.75	2017.75	2219.75	2243.83	1449.75	1120	760.5	509.75	431.75	418.5	396	388.5
0	384	0	0	0	0	0	0	0	382.455	385.556	377.333	386.167	379.167	385	381.4	377.5	383.167	385.75	386	392.5	387.167	377.25	359.75	168.5	0	0	0	415.2	539.8	609.5	943	1086	1431.5	1829	2058.75	2124.75	2600.75	3017.25	2152.75	1840.75	1009.6	587.2	465.75	406	414.5	388.75	381.75	382	377
0	386	0	0	0	0	0	0	0	412.1	395	404.286	412.333	400.5	415.5	399.667	405.5	404	417.5	411.25	403.25	422.5	434.667	464.75	224.75	0	0	0	960	1372.4	1777.6	2834.75	2114	2104.25	2718	2394.25	2797	2234.5	2089.75	819.75	530.5	511.75	487.4	399.4	392.25	384.25	367.25	376.75	380.25	379
0	431	0	0	0	0	0	0	0	448.5	449.7	449.375	459.333	462	477.2	463	496.6	511.5	540	613.5	663.5	902	893.2	1469.8	694.25	0	0	0	1932.25	2018	2993	3983.25	3362.25	2427	1725.25	1442	772.75	575.75	476.25	422.75	407	402.25	394.25	390.6	381.6	369.25	382.5	372.75	376	369.833
0	667.5	0	0	0	0	0	0	0	653.8	655.167	687.429	818.333	806.5	1050.83	1165.25	1389.83	1611.5	2057.25	2353.83	2203.25	1970.5	2295.25	2214.33	1444.25	0	0	0	2421.75	2945.5	2383	2547	1228.75	752.75	503.75	456.75	413.5	405.5	386.25	381.75	384	372.5	396	372.75	378.5	361.5	365.833	375.167	371.167	375
0	2710	0	0	0	0	0	0	0	2153	2641.47	2476.12	2728.5	2835.33	3179.67	3212.25	3354.83	3280	3017	3902	2893.5	2975.25	2604.5	2699.75	1592.67	0	0	0	1134.75	852.5	648	585.4	451.8	420.25	417.25	393.75	377	370	372.75	356.25	379.75	371.5	367.5	366.5	374	366.833	357.6	376.5	374.25	367
0	5285.5	0	0	0	0	0	0	0	0	5241.93	5016	4813	5185.33	4492.5	3747	3503.5	2662.83	3212.5	2862.75	1977.67	1610.5	1043.5	857.75	536.6	0	0	0	395.5	398.75	403.5	402	375.8	384.4	371	357.4	345.333	351.833	359.5	366.333	354.5	358.25	356	355	341	357.75	351.167	353.25	356.75	365.25
0	6287	0	0	0	0	0	0	0	0	4949.57	9068.38	3748.33	3593.67	2420	1308.83	1317	820	811.5	596.75	522.2	450.8	428.75	383.25	367.5	0	0	0	341	364	373.333	368	387.833	371.75	368.714	392	377.75	380.25	379.5	379.5	380.25	394	366.5	366.25	365.25	389.5	394.75	381	374	384.25
0	1263	0	0	0	0	0	0	0	0	1171.08	1400.11	781.286	758.667	598.667	512.4	485	456	437.5	438.5	402	403.667	395.333	371.833	334.667	0	0	0	345.167	360.4	366.25	376.25	376.25	367	389	367.6	380.5	366.5	377.25	374.25	383.75	384	367	356.75	352.25	375	377.5	370.75	366.5	387.25
0	467.333	0	0	0	0	0	0	0	0	456.857	451.188	432.727	422.3	410.25	419.143	400.111	416.167	397.125	380.571	379.5	379.286	375.667	368	342.5	0	0	0	331.75	368.75	379.75	379.5	365.5	377.25	349	383	360.6	379.25	384.25	365.25	392	392.5	383.75	365.75	366.5	379.5	381.75	391.5	396.6	375.2
0	426.5	0	0	0	0	0	0	0	0	415.714	404.636	398.625	393	402.167	400.833	391	388.333	384	368.5	391	389	358.4	351	313	0	0	0	226.5	360.75	377.25	382.5	374	368.75	393.25	381	378.5	370.5	388.75	382	368.5	376.25	386.25	386.25	400.25	383	369	385	384.25	396.6
0	388	0	0	0	0	0	0	0	0	375.5	387.8	381.222	369.167	383	380.167	348	369.667	375.25	368.2	373.4	363.75	370.5	357.333	330.5	0	0	0	199.2	359.8	381.25	387.25	371.5	387.5	365.25	353.5	378.5	388.833	411.25	401.75	370.25	384.5	364.75	384	382.75	377.25	382.25	410.25	374.75	407.75
0	384.5	0	0	0	0	0	0	0	0	0	393.875	376.25	391	369.5	385.8	379	379.8	379	376	352.5	360	368	357.8	341.4	0	0	0	152.5	344.167	389.25	369.25	379	386.5	377	370	383.5	382	378.333	382.5	374.75	390.75	382	391.75	380.5	385	392.75	393.5	395	388.5
0	388	0	0	0	0	0	0	0	0	0	381.571	387.5	376.5	361.833	375.5	387.667	374.75	379.667	369.5	357.4	366	363.75	363.75	341.167	0	0	0	167.25	356.75	370.833	376.25	394.25	378.75	390.5	380.75	385.5	389	381.4	370.8	360.5	386.5	403	394.25	388.25	387.5	405	397.5	403.75	402.25
0	375.5	0	0	0	0	0	0	0	0	0	369.692	390.556	372.125	397	383.333	372	372.4	390.2	371.4	375	368.167	362	365	350.75	100.833	0	0	163.75	358.75	378.6	378	384.5	398.75	394.5	392	376	375	378	378.8	383.2	395.25	392	377.5	401	408	381.75	394	393	410.75
0	379	0	0	0	0	0	0	0	0	0	368.636	361.5	370.857	371.286	382	372	373.5	371.5	368.833	370.5	368.75	358.833	352.5	349	130	0	0	175	354.75	375.25	379.6	381	385	389.75	378.75	373.75	396.25	393.25	395.5	382.833	393.25	386.75	376.25	404.5	399.25	396	392.75	393.5	403.5
0	375	0	0	0	0	0	0	0	0	0	376.375	384.167	378.75	371.167	374.333	358.5	367.8	366.8	381.2	369.6	372.25	384	369.5	354.25	160.25	0	0	178	370.25	391.75	395.25	392.833	384.25	398	401.25	386	380.5	387.25	379.75	382.75	395.167	396	392.25	394.75	380	404.5	410.333	400.167	401.333
0	390.5	0	0	0	0	0	0	0	0	0	369	375.286	381.667	383.429	377.5	373.333	370.5	381.167	390.25	376.833	380.25	374	378.667	357	159.75	0	0	182	369.25	382.5	380	386.25	398.167	410	407.75	386.5	402.25	392	392.5	386.5	404	405.5	407.143	397	405.4	408.25	394.75	404.5	429.5
0	377	0	0	0	0	0	0	0	0	0	0	386	388.889	379.333	382.286	387.8	381.667	378.167	371.5	389.6	390.6	382.25	377.8	375.4	173	0	0	142.6	381.75	388.25	401	399.75	388.8	402	398.333	404.833	400.167	389.333	404.5	399.667	408.25	390	414.833	402.5	410.75	415.25	405	417.5	409.75
0	390	0	0	0	0	0	0	0	0	0	0	390.75	380.444	389.571	382.5	391.833	379.667	377.25	389.833	380.75	391.333	376.5	384.75	366.5	164.75	0	0	105.143	375.714	395.667	391	409	400.833	393	404.333	412.5	385.75	404	401.75	410.75	414.5	402.75	411.5	407.667	412.25	404.75	414.75	409	403.75
0	392.5	0	0	0	0	0	0	0	0	0	0	379.214	389.1	382.571	389.429	375.667	378.8	373.6	393.286	385.571	373.143	377.25	382.833	368.143	215	0	0	0	362.167	383.25	392.25	376.75	396.5	406.75	388.8	391	397.5	410.25	404	396.75	392.75	398.5	392.75	389.5	411	397	408	407.75	417.25
0	367.333	0	0	0	0	0	0	0	0	0	0	381.625	381.059	384.5	380.222	383.556	383.778	388.222	399.4	391	376	382.833	377.5	382.25	279	0	0	0	369	382.667	385.75	399.5	403	398.75	402.25	392.4	405.8	398	416.25	414.25	393	396.75	400	398	402.6	414.8	414.5	411.75	399
0	399	0	0	0	0	0	0	0	0	0	0	391.714	405.846	398.75	399.5	393.5	392	402.5	380.167	388.6	402.4	372.5	398.167	390.5	362.5	0	0	0	391.25	391	416.333	417	436.5	414.75	399.25	422.5	402.5	429	420	417	436.75	410.5	434.75	423.75	419.25	439	449	419	425.5
[truncated: 82 more columns]

## Sheet: Fig 2g
0	0	0	0	0	0	0	0	0	0	0	0	0	0	0	0	0	0	0	0	0	0	0	0	0	0	0	0	0	0	0	0	0	0	0	0	0	0	0	0	0	0	0	0	0	0	0	0	0	0
0	0	0	0	0	0	0	0	0	0	0	0	0	0	0	0	0	0	0	0	0	0	0	0	0	0	0	0	0	0	0	0	0	0	0	0	0	0	0	0	0	0	0	0	0	0	0	0	0	0
0	0	0	0	0	0	0	0	0	0	0	0	0	0	0	0	0	0	0	0	0	0	0	0	0	0	0	0	0	0	0	0	0	0	0	0	0	0	0	0	0	0	0	0	0	0	0	0	0	0
0	0	0	0	0	0	0	0	0	0	0	0	0	0	0	0	0	0	0	0	0	0	0	0	0	0	0	0	0	0	0	0	0	0	0	0	0	0	0	0	0	0	0	0	0	0	0	0	0	0
0	0	0	0	0	0	0	0	0	0	0	0	0	0	0	0	0	0	0	0	0	0	0	0	0	0	0	0	0	0	0	0	0	0	0	0	0	0	0	0	0	0	0	0	0	0	0	0	0	0
0	0	0	0	0	0	0	0	0	0	0	0	0	0	0	0	0	0	0	0	0	0	0	0	0	0	0	2.5	2	2.25	2.25	1.5	2	2	2	2	2	2.5	2.75	2.25	1.75	2.25	2.75	3.25	1.75	2	2.25	3.25	2	1.25
0	0	0	0	0	0	0	0	0	0	0	0	0	0	0	0	0	0	0	0	0	0	0	0	0	0	0	4	4.75	3.75	6.25	5.25	6.25	6	4.25	4.5	4.25	5	4	5.25	5.25	4.25	5.25	4.5	4.5	3.5	5.75	6	4.25	4
0	0	0	0	0	0	0	0	0	0	0	0	0	0	0	0	0	0	0	0	0	0	0	0	0	0	0	6.25	4.5	4.25	5.5	6	5.5	5	5.25	5.25	5.5	5.75	4.25	4.5	5.5	5.75	4.5	4.5	4.75	4.75	5.5	5.5	5.25	5
0	0	0	0	0	0	0	0	0	0	0	0	0	0	0	0	0	0	0	0	0	0	0	0	0	0	0	11	9	11.5	9.25	10	9.5	11.25	8.5	10.75	9.5	9.25	10	9.75	7.5	8	6.75	6.75	6.75	10	7.5	6.75	7.75	7.5
0	0	0	0	0	0	0	0	0	0	0	0	0	0	0	0	0	0	0	0	0	0	0	0	0	0	0	35.5	37.25	42	35.5	33	37	35.75	33.5	35.25	34.5	35.75	30.5	35.75	30.75	33.25	36.25	31	30.5	32	31.25	29.5	27.75	29.75
0	0	0	0	0	0	0	0	0	0	0	0	0	0	0	0	0	0	0	0	0	0	0	0	0	0	0	79.75	76	88	85.25	80	83	81.5	81.5	80.25	79.75	79.25	76.25	78	75.75	79	78.5	74.75	77.5	71.75	81	72.75	74.25	72.25
0	0	0	0	0	0	0	0	0	0	0	0	0	0	0	0	0	0	0	0	0	0	0	0	0	0	0	109	110.25	114.75	108.5	109.5	116	111.5	116.25	111.5	119	117.75	105.5	112.25	109.25	110.5	106.25	106	111.75	109	110.25	104.5	109.75	113.5
0	0	0	0	0	0	0	0	0	0	0	0	0	0	0	0	0	0	0	0	0	0	0	0	0	0	0	120	138	130	130.25	126.25	145.5	126.5	127	123	120.75	125.5	124.25	135	139.75	134	132	128	143.75	131.25	124.25	122.25	129.25	129
0	0	0	0	0	0	0	0	0	0	0	0	0	0	0	0	0	0	0	0	0	0	0	0	0	0	0	141	139	146.75	146.5	151.75	152.25	137.75	151.25	136.25	150.75	145.25	145.75	138.75	137.75	147.75	146	147.75	147	143.75	146.75	147.25	149.5	137.25
0	0	0	0	0	0	0	0	0	0	0	0	0	0	0	0	0	0	0	0	0	0	0	0	0	0	0	151	158	161	156	154.75	150.5	153.75	158.75	149.5	151	164	148.25	153.75	166	159.75	153	157.5	169.5	158.25	161.5	152.25	161.25	159.75
0	0	0	0	0	0	0	0	0	0	0	0	0	0	0	0	0	0	0	0	0	0	0	0	0	0	0	159	164	174.25	177	176.75	176.5	171.5	173.5	169.25	158	169	160.5	164.5	174	173.75	182.75	156.5	153.75	168.25	172.25	176.5	172.25	183.5
0	0	0	0	0	0	0	0	0	0	0	0	0	0	0	0	0	0	0	0	0	0	0	0	0	0	0	165.25	176.25	170.5	172.25	192	190.75	183.5	178.25	177.5	160.75	174.25	179.75	175.75	176.75	172.5	180.25	179.25	181.75	172.25	177	175.25	185.25	175.75
0	0	0	0	0	0	0	0	0	0	0	0	0	0	0	0	0	0	0	0	0	0	0	0	0	0	0	174.75	183.25	184.25	182	194	189.5	186.75	177.5	181.5	170.5	182.5	191	189	174	183	175.75	178	180.75	179.25	179.25	189	182.25	184.5
0	0	0	0	0	0	0	0	0	0	0	0	0	0	0	0	0	0	0	0	0	0	0	0	0	0	0	181.5	190.5	213.25	180.25	184.75	193.75	187.5	201	185.5	203.25	200.5	188	186.5	191.25	198	200.25	191.25	197.25	188.75	186.5	198.25	178.5	201
0	0	0	0	0	0	0	0	0	0	0	0	0	0	0	0	0	0	0	0	0	0	0	0	0	0	0	195.25	197.5	192	214	193.5	206.5	193.25	199.75	199.75	210	202.75	188.25	193.25	205.25	197.25	204.25	195.75	196.5	200.5	194.25	199	192	193.25
0	0	0	0	0	0	0	0	0	0	0	0	0	0	0	0	0	0	0	0	0	0	0	0	0	0	0	175.75	191	196	194.5	196.75	191	192.5	194.5	197.75	191.25	201.75	205.25	204	196.25	202	184.5	208.75	190	206	186	205.75	194.5	198.25
481.8	661	542.75	440	360.5	313	264	256	226.25	225.25	217.5	212.25	202.25	204	200.25	203	200.5	199.2	198	196	196	184	172.75	0	0	0	92.25	184.5	195	206.5	199.25	204.75	201	197.5	204.5	204.5	194.75	198.25	193.5	199.75	200.75	194.75	202.5	206.25	201.5	197.5	203.75	204	199.25	196.25
462	600.5	522.5	437	352.5	320.5	300.75	261.25	245.75	230.25	220	218.25	208.25	199.75	210.25	211.75	203.25	208.5	212	192.5	212.5	195.5	190.5	0	0	0	90.75	198.5	209.5	205.5	204.5	202.25	208.5	223.75	199.75	203.5	213.75	212.75	208.75	207.5	202.5	212.75	217.25	209	203.5	201	205	200	212.5	216.5
431.75	503	486.25	407.75	346.5	311	284.25	265.5	246.25	225	228	224.5	223	222	227.75	204.5	216	212.5	209	217.5	204.25	217	194.5	0	0	0	95.75	205.75	210	213.5	207.25	213.25	213.25	207.75	219.75	215	211	212.75	212.75	210	214.25	233.25	216.75	214	222.75	214.75	212	216.25	197.5	214.75
407.25	476.5	455.5	378.5	337	306.5	284	276.25	257.25	247	219.5	233	230	220	233	218.25	225.75	221.75	222.833	224.25	209	210.25	199.5	0	0	0	93.75	205	214.5	219.25	221.75	222.25	217	223.5	203.25	219.75	202.5	229	223.75	216	206.5	214.75	221	218.25	219.5	221	221.25	206	215.75	224.75
379.25	469.5	425.25	359.5	323.75	277.75	261.75	254.75	260.75	234.25	231	225.75	220.25	210	211	232.75	219.25	223	230.5	214	228	212	193	0	0	0	96.5	218.25	216.5	222.5	223.25	222.25	218.5	227.5	219	212.5	231.5	219	218.25	213.25	218.25	216.75	218	211.75	223.25	209.5	212.5	223.5	220.25	214
363.75	386.5	384.25	342.5	333.25	291.75	250.75	263.25	253.5	258.75	232	229.5	237.5	237.5	230.5	229	236.25	226.5	239.667	226	215.75	225	187.75	0	0	0	98	207.5	221.5	219.75	215.25	221.5	221.5	228.5	235.5	211	231	219.75	221.75	215.25	219.75	217.5	222	208.75	213	216.5	231.75	221.75	215.25	213.5
355.25	393	366.75	344.25	287	297.25	282	254.75	246.75	234	235.5	242.75	234	231	227	239.25	235.5	226.25	232	231	229.5	220	196	0	0	0	97.5	231.75	225.25	225	228.25	235.25	226.25	233.5	233	232.75	231	222	226.25	236.25	219.5	220.5	230	239	220.75	228.25	231	228.25	227	231.75
341.5	381	341.5	321	295.5	294.5	268	272.5	253.75	259	243.25	242.5	234	232.75	245.75	245.5	217	227.75	238.25	226.5	238.75	225	208.75	0	0	0	104	230.25	220.75	225	243.25	226.75	225.25	230	254.25	237.25	236.5	220.75	232.5	246	222.25	226.75	236	226.5	235.75	218.5	235	222.75	214.25	224.5
320	356.5	336	309.75	297.5	285.25	275.75	262	256.25	232.25	249.5	244.25	242	236.5	245.75	240.5	232.75	225.5	228	230.5	240.25	225.25	212.5	0	0	0	107.5	218.75	225.75	233.75	230.5	219	219.5	231.75	229.75	231.75	233	240.25	239.25	217.5	240.75	231.25	233.25	241.75	240.5	237.75	245.25	234.75	241.75	234.5
330.25	326	319.75	306.5	289.5	296.75	278	263	248.25	254.75	248.25	238.25	239.75	242.25	242.25	244.75	242.5	223	236.25	239.333	237.25	226.5	208	0	0	0	103.5	225.75	251	244.75	248	235.25	243	224.75	251.5	220.5	242.75	243.75	247.75	236	234.5	236.75	233.75	239.25	229.75	237	240	241	235	229.25
323.75	333	305.5	300.25	285.25	282.75	285	261.75	247	240	250.75	247.5	252	242.25	244	259	231.25	237.75	245.25	232	238	226.75	211.25	0	0	0	99.75	222.75	240.25	238	222.75	259.75	241	240.5	245.5	247.75	242.75	253.75	231.75	220.25	234.5	230.25	224.25	228.5	241	237.5	253	245.75	239.25	227.25
303.25	318	294.25	308.75	282	286.25	279.5	270.75	270	261.75	244.5	258	229	245.25	252	234	242.25	217.5	240.5	240.75	240.667	227.75	207.5	0	0	0	109	230.75	241.5	243	245.75	233.25	243.25	253	239.25	239	247	235.75	235.5	237.25	253.75	238.5	232.75	241.75	257	242.25	253.75	229	229.5	231.5
298.25	317.5	289.25	281	286.5	261.75	259.5	257.5	255.75	252.75	258.75	261	241.5	230.5	248.75	234.75	245.25	243	234	234.25	233.333	231	207.25	0	0	0	102	234.25	250	255.75	243.75	235.5	230.75	247	218	234.25	242.5	240	249.25	231	234.25	240	249.75	232.25	260.75	235	242	235.75	251	236.25
298.5	320	293.75	288.5	284.75	279	279.25	264.5	284.5	259.25	257.5	244.5	258.25	258.75	246.25	241.75	260.75	250	228.75	233.5	241.833	250.5	217.75	0	0	0	104.5	233.25	235	235.5	252.75	239.5	261.75	244.75	247	243.75	253.25	243.5	257.75	246.25	250.75	243.5	242.25	239.75	249.25	258.75	249.75	238.5	246	255.5
277.25	309	276.25	276.25	270.75	268.75	252.5	261.25	258.75	242.5	255.5	249.5	227.75	241.75	247.75	230	246.5	243.25	240.25	220.25	237	225.5	210.75	0	0	0	114.25	229.75	229	250	240.5	251.5	240.25	239.5	219	237.75	235.25	246.75	228.25	247	226.25	247.5	236.75	236.5	232.25	241.5	245.5	230	234.2	237.75
277	297.5	276.5	269	262.25	269.5	247	264.25	261.25	237.5	248.25	245.75	244.5	242.75	243.25	246.75	240.25	254.5	242.5	255	242	232.667	215.25	0	0	0	112	243.25	246.5	245.5	246.25	247.25	245.25	240.5	245.5	241.5	240.25	245.25	238.75	236.25	241.25	245.25	241.25	240	242.167	236.167	249	246.25	241.5	247
281.25	286.5	271.5	267	260.75	262.5	262.25	266.75	259	258.25	254.75	250	254	259.75	258	246.75	242	253.5	256.25	250.75	247.75	248.2	223.4	0	0	0	108.5	241.5	251.5	247.5	247.5	250.75	247	251.25	254	258.25	243.75	246	238.75	247.25	250.75	253	252.5	245.4	251.25	247.75	243.5	254	254.5	238.75
279.75	289	273	281.25	279.75	281	259.5	259.5	252.25	254	257.75	266.5	251.25	246	262.75	251	247	260.5	246	256.75	250.5	249.25	231.167	0	0	0	111.75	231.25	252.25	254.5	251.25	250.25	253	257.25	243.25	247.25	255.75	258	257.8	251.833	246.5	250.25	257	249	246.5	247.25	250.75	248	254.25	250
284	279.5	282.25	274.25	266	261.75	259.5	266	260.5	262.75	257.5	249.5	254.75	253	255	246.75	241.75	245.75	260.5	244.75	252.5	254.25	231.333	0	0	0	114	243	252.5	251.5	255	236.5	260	246	248.75	250.2	258.833	250	246.8	250	257.75	264.5	259.25	250.25	262	247	253.25	262.5	249	242.25
289.25	294	275.25	273.75	270.75	280.25	258	260.5	267.75	262	259.25	263.5	262	246.25	249.5	257.25	249.5	253	250	247.75	250.75	246.25	233.25	75.8333	0	0	113.5	247	240.5	256	250.25	258	259.4	253.667	262.5	252.2	246.5	259.25	260	250.75	257.75	255.5	252.5	255	254	252.5	248	258.75	256.75	256.25
285.5	286	275.25	278.25	270	270.75	263	258.5	250.75	253.75	268.5	256.75	263	254.75	250	252.75	244.25	264.25	259.5	243	252	246.25	228.25	75	0	0	109.75	251.5	248.25	269.6	257.667	250.833	253.6	259	264	260.5	249.75	253.5	264.25	261	247.25	256.75	251.75	246.5	266.25	255.25	246.25	254.75	260.25	255.75
273	279.5	283.333	281.8	273.25	267.5	269.25	262.25	270.5	257.5	260	269	260	257.75	263.25	263.5	261.75	261.5	262	269	258.5	258.75	244.25	112.25	0	0	118	258	253.833	261.2	258.5	255.25	271	271.25	262.25	262.25	253.25	261.75	255.5	264.25	261.5	253.75	258.25	260.25	252.5	252.75	253	261.25	261	259.75
276.667	292.5	274	275.333	269	262.25	268.75	264.75	284	259.25	259	274	254.25	262.5	257.75	261.75	263	266.25	259	255.5	253.5	248	247.333	107.5	0	0	120.25	247.25	262	265.25	254.5	269.5	257.5	259.75	266	263.25	261.5	269	254.5	257.5	266	260	260.5	263	248.75	257.25	263.25	259.25	264.25	257
272.5	277	279.5	273	272.25	273	270.75	273.75	271.25	262.75	271	269.5	266	269	272.25	260.75	262	259.667	260.167	259	251.5	251.167	238.25	112.75	0	0	121	247.5	264.75	271.75	270.5	265	266.5	261.25	267.75	258	261.25	265.25	255.75	277.75	269	266.5	258.75	261.75	256.75	252.25	259	258.5	266.75	261.75
280.5	270	274	286.833	274	274.75	277.25	269.75	275	258.333	273.667	266.5	261.167	262.5	262.667	263.333	261.8	262.5	258.5	252	271.25	251	242.25	110.75	0	0	117.75	261.25	262.25	268.75	269.75	257.5	260	260.25	265.25	279.75	263.75	272	268.5	264	256.5	258.75	267.25	255.75	254.25	263	256.5	268	268	267.75
286.333	286	290.667	281.556	281.5	275.5	280.333	275.5	281.25	271.75	272.25	275.5	270.75	274	276.25	257.5	260.75	266.5	252	253.25	261	252.75	248.25	108.75	0	0	79	254.75	259.5	256.5	257.75	273.75	258.5	259	259.5	265	270.5	264.75	265	274.5	258.75	258.75	259.75	264	267.5	269.75	261	273.25	263	257.25
288.5	284	0	274.75	268.5	267.25	263.75	267.5	265.5	259.25	274	269.5	259.5	261.75	269	259.75	266.5	258.75	272.75	275.25	274.25	257.25	246.5	110.25	0	0	78.8333	247	263.25	261	266.5	270.75	272.75	263.5	272.75	273.25	261	272.25	272	263	267.75	271.25	270.25	260.5	268.75	266	277	270.75	271.25	268.75
0	280.5	0	278.857	273.6	265.5	264.75	274	270.75	259.25	274	266.25	267.5	259.5	261	264	271.5	266.75	271.25	263.75	267.5	254.5	249.25	110.5	0	0	0	248.5	254.75	264.75	258.25	274.25	261.5	256.5	280.5	266.75	271	267.5	267.5	257.25	278.5	255.75	270.75	275.5	257.25	278.5	272.5	276	262.75	262.5
0	283.5	0	270	279.833	271	266.5	275.5	276.5	262.75	264.5	271.25	263.75	267.5	275.25	265.25	264.25	275.25	259.25	259.75	266	273	251.75	115	0	0	0	254.333	269.75	269.5	276.5	275.5	276	272.5	271.25	266.75	276.25	279.5	266.5	268.25	260.75	257.75	274.75	267.75	274.75	266.5	272.25	277.25	278	256.25
0	287.5	0	270	281.667	272.25	268.75	267.25	271.5	272.5	265.5	264.75	275.25	268.5	264	268.5	254.75	267	274	269	274.75	257	245.5	108.75	0	0	0	249.25	267	258.25	278.75	269.5	283.75	266.75	272.25	264.25	267	265.5	264.5	275.75	270	267	285	274	273.25	268	268	271.75	272.75	270.25
0	273.5	0	278.333	281.5	268.25	263.25	269.25	279.5	268.75	271.5	268	264.5	251.75	262.25	271.5	259	274.75	265.75	271.75	267.5	272	253	113.25	0	0	0	251	268.833	271.75	275.5	269.25	276.25	275	273	275	264	269	271.5	274.75	279.5	272.25	275.25	271.75	272.25	273.75	265.5	279.25	272.5	279.25
0	280	0	273.167	273.833	281.75	279.75	275.25	269.25	261.75	269.75	266.75	270	266.75	266.5	271.75	265.25	269	271.5	266.75	260.5	264.25	255	119	0	0	0	247.5	263	266.333	272.5	277.5	270.75	268	266.25	284.75	271.5	277.25	269.75	278.5	276.75	272.25	279.25	279.5	277.5	271.75	276.5	274.5	278.5	269.5
0	274.5	0	277	285.5	277.667	262	269	286.25	272.5	268.75	271.5	271	265.75	272	268.75	272.5	275.75	277.25	281.5	266	272	252.25	118	0	0	0	250.5	268	283.8	278.4	269.75	265.75	279	271	281.5	279.75	286.75	270.75	271.75	277	266.5	275.25	276.25	278.5	274.5	278.5	271.5	277.5	283.25
0	283	0	284.167	276.5	276.833	288.75	280	272.75	271.25	272.75	275.5	274.25	265	261.25	270.25	271.5	267.5	271.5	274.75	259.5	272	253.25	121.5	0	0	0	249	273.5	278.5	280.833	267.75	269.75	281	262.5	265.5	276	273.75	274	278	280.25	266.75	272.75	280	280.75	271	271.25	276	266.75	273.25
0	285.5	0	277.5	270.75	271.833	284.75	276.75	273.5	277.75	289	271.75	266.5	284.75	276.75	270.75	276	282.25	257	269.5	270	270	258	122.5	0	0	0	251.5	263.5	282.75	274	270	292.75	276	289	278.75	273.25	276.5	265.5	276	267.5	286.75	282.75	286	284.25	276.75	280	267	273	274.75
0	296	0	272.5	278.667	278	281.75	275.75	270.5	266.75	282.25	276.75	269.5	280	278.5	282	262.75	274.5	266.5	273	258.25	262.25	256.75	120.5	0	0	0	255.5	274.25	285.75	285	281.167	297.75	290.25	277	280.75	276.75	272.25	283.25	283.75	283.75	275.75	284.5	280.25	285.25	282.25	277	274.25	274	285.75
0	280.5	0	276	283.833	280.5	282.333	274.5	289.25	276.25	281.25	278.25	274.75	282.25	270.5	261.75	272	276	273.5	282.75	267.75	272	260.5	119.75	0	0	0	262.5	264.75	267.75	288.25	268.8	274.4	271.5	284	277	277.75	288.25	286.75	276.5	273.5	279.25	282	274.25	272.25	281.75	278.75	274.25	276.25	284
0	279.5	0	287.75	277.167	280.25	285.833	279.5	278	275.5	271	272.5	277.75	272.25	281	286.25	266	277	268.25	274.75	270	277	271	112.5	0	0	0	248.5	270.5	280	294.75	283.75	290.167	281	277.25	284.25	288.25	280.5	281.5	279.5	282.5	274.5	276	281	273.75	286	285.25	267.5	284.5	275
0	294.5	0	290.5	278.833	280.25	276	271.5	280.25	270	274.75	282.25	275.25	268	276.25	276	284.25	280	272.5	268.25	265.75	265.25	250.25	114	0	0	0	258.5	274	290.25	279.75	271.25	282.8	274.4	283.25	287.5	283.25	282	286.5	291.75	291.5	292	286.5	280.75	282.5	276.25	276.5	279.25	285.5	273.25
0	285.5	0	284	285	293	276	275.333	277.25	274.75	289.5	282.25	263.75	279.75	267.25	275	277.25	273.25	266.5	270	279.5	264.5	253.75	124.25	0	0	0	249.5	262.75	290	285	273.75	281.25	284.167	280.75	296.25	285.75	291.5	273.5	288	281.25	295.5	284.25	287	274.5	276.75	294	290.25	289	290
0	276	0	291	281.625	283.25	279.75	283.833	273.5	270.75	290	284	274.25	272.5	281.25	264.25	280.25	274	272.75	271.25	280.25	269.25	262.25	117.75	0	0	0	253	275.25	283.75	277.75	288.5	281.25	286.25	287	279.75	285.75	285.5	287	285.5	279.25	273	288.75	287.25	269.5	271.5	288.75	281.5	286.5	296.5
0	286	0	0	289.375	284.167	293.5	274.4	277.8	282.25	281	277	278.5	278.75	280.25	275.25	269.25	287.25	279	279.75	270.25	274.25	266.25	115.5	0	0	0	254.25	279.75	278.75	295.75	279	289.75	285.25	286.5	277.75	285.25	290.25	298.75	281.5	282.25	286.75	277.25	286.75	281	280.75	280.75	285.75	288.5	293.5
0	272	0	0	277.5	278.667	273.25	283	283.333	280.25	284.25	271.75	290.75	281.5	285	276	276	270	269	267	267.5	273.25	262	123.25	0	0	0	251	279.75	305	284	287.25	292.75	282	286	287	279.75	289	294.5	291	271.5	296.5	290.25	292.25	288.75	288.5	292	279.5	303.5	297.75
0	274.5	0	0	282.125	279.5	290	281.25	281.5	284.5	272.5	288	281	285	277.25	290.5	270.5	270.75	280.5	273.5	271.75	276	270	119	0	0	0	266.5	283.25	287	284.25	280	287.25	287	291.75	292	287.25	289.5	291.25	293.75	287.75	284.25	284.25	292.5	305.5	290.25	282.75	290.25	300.5	294.25
0	269.5	0	0	283.25	290.333	289	287.5	276.75	283	282.5	275.75	278.25	279.25	281.75	277.5	279	280.25	265.25	293.25	275	277.75	258	116.5	0	0	0	261	270.5	282	294	290.75	296	287.5	276.75	283.75	280.333	288.5	287	295.75	283	292	302.25	297	294	290.25	289.5	294.25	291.25	286.5
0	291.5	0	0	290.75	284.8	284.2	274.25	287.25	276.5	282.5	288.5	277.5	280.75	280.25	271	289	267.5	276	282.75	285.5	281.5	265	124.25	0	0	0	261	292	287	287	293	281.25	285.25	288.75	287	294.6	280.4	288	291.75	277.75	287	301.25	295.25	301.75	299.75	289	288	287.5	290.75
0	300	0	0	273.833	288.667	294.667	284.25	288	273.6	278.6	288.75	276.5	285.75	286.75	280.5	286.5	279	282.5	279.75	284.25	282.75	268.5	127	0	0	0	263	284.25	281.75	284.25	294.75	296.5	294	284	290.5	298.5	293.833	299	291.5	300	297.5	286.5	300.5	287.25	288.75	294.75	298.75	301.5	295.25
0	300.5	0	0	283.667	282.667	285.167	285	284.5	274	282	268	281	278	283.25	284.25	282.25	290.75	283	273.25	272.5	282.25	260.75	116.5	0	0	0	270.5	287.5	278.75	287.5	292.25	289.5	291	285.5	280.25	300.5	289.6	288.8	286.75	290.75	305	290.25	288.25	283	300.75	286.75	296	281.5	292.25
0	292	0	0	284	280.833	283.5	282.75	279	275.75	283.4	278.2	290.25	272	275.75	290.25	289.25	288.5	277.75	278	275.5	278.5	262.5	121	0	0	0	259	278.5	296	290.25	290.5	288.75	280.5	295.75	279	302.25	293	295.5	291.75	290	300.5	289.25	295.25	285	294.75	289.25	288.5	286.5	292.25
0	278	0	0	290.8	289.286	276	280.2	296.75	282	276.5	289.833	291	284.75	284.75	289.25	279.5	285.5	280.5	277	287.5	284.5	277.5	118.5	0	0	0	265.5	291	296.25	297.25	298.5	288.75	288.75	306.5	299	287.75	293.5	293	294.667	287.5	296.25	295.75	289.25	291.25	296.25	299.5	275.25	298	301.25
0	288.5	0	0	287	283.625	286	280	288.25	282.25	294.75	283.2	283.2	297.25	286.75	283.25	276.75	292.5	281.25	270.25	285.25	276.5	260.5	122.75	0	0	0	262.25	291	279	297.25	295	302.5	289.75	292	294.75	301.25	298	293.25	297.167	304.75	296.5	290.5	296.25	294.5	295	295.25	285	283.5	304.25
0	281.5	0	0	290.667	285.875	287	295.333	288.25	288.5	283	295	295.5	286.75	286	290.5	290.75	283.25	283.5	285.25	279.25	271.25	265.5	123.25	0	0	0	257.25	292.5	288.75	299.5	291	294	300.25	304	278.25	300.5	297	305.75	296.5	298.167	294.5	300.75	297.75	295	298.75	297.5	297.25	302.75	307.5
0	296	0	0	280	299.556	289.333	291	292.5	287	300.75	297.5	290	289.8	292.25	281.25	295.5	280	287	283.75	274.75	282.25	262.5	127	0	0	0	264.25	288	291	313	306.75	304.5	294.5	321.75	308	299.25	309	301.25	302.75	300.8	291.4	317.5	310.25	298.25	282.25	287.25	298.25	301	300.5
0	305	0	0	0	291.8	298	301.5	290.167	299.25	288.75	289.75	291.5	283.833	282	299.75	287.75	289.75	278	290	288.25	290	266.5	120.25	0	0	0	266.75	297	290.25	322.75	298.25	301.75	307.25	304	297.5	301.25	302	300.25	299	299	284.833	300	303.5	292	304.25	294.5	295.75	290	304.5
0	299	0	0	0	291.9	292.333	292.25	289.667	281.25	296.5	289.25	290.5	291.25	283.333	301	291	292.75	288	279.75	287.5	280	269	130.25	0	0	0	272.75	282	294.25	303	302.75	295.75	303.75	303	297.5	313.75	307.75	297.5	302	296.5	302.2	303	300.5	299.5	298	304.75	304.5	303.75	311.5
0	286	0	0	0	291.111	289.143	274.5	287.5	297.75	287	295.25	287.75	293.75	287.4	285.8	293.25	281	281.75	285.5	284.5	293.5	273.25	121.75	0	0	0	268.5	289	299.75	297.75	300.75	298.25	305	299.25	307.5	298.25	309.5	311.25	299.75	301.25	306.25	304.5	294.5	310	298.25	304.25	302.6	300.167	307.5
0	282	0	0	0	298	293.667	300.667	291.75	290.833	285.75	284.5	287.75	288.25	285.5	286.333	291.5	296.5	292.75	284.5	289	280.75	276.5	123.25	0	0	0	275.5	294.5	290.75	303.25	307.5	309	299	290	296.25	301.5	309.75	308.25	295.75	303.25	304.75	304.75	317	311.4	309.333	300.5	311.4	309	310.25
0	288	0	0	0	292	302.333	285.333	286.5	300.333	300.5	347.5	302	283.25	299.25	280.6	290.4	298.25	293	284.25	301	303	269.5	129	0	0	0	276.75	295.5	297.75	315.75	315.5	312.75	312.5	292	292.5	310.25	300.75	299	297	293.25	309.8	308.667	305.5	300.5	321.25	307	313.25	314.75	301.75
0	295.5	0	0	0	296.857	302.143	302	290.5	311.8	294.2	339.5	305.5	296.5	298.25	292.25	285.167	285.25	289.25	292.5	301.5	284	275.5	128.25	0	0	0	268	296.25	300.75	308	306.25	300	299.75	313.75	308.25	306	302.5	299.667	304.333	308.667	317	313	313.75	307.5	320.5	306.25	303.75	309	299
0	290	0	0	0	292.167	297.125	296.5	293.5	303	301.5	294.25	294	297.75	296.75	299.25	292.75	298.5	299	295.5	288.25	287.5	271.25	127.75	0	0	0	285	304.25	301	300	304.5	301.5	302.4	311	308.5	307.333	296.333	301	313	295.5	313.5	308.25	305.25	302	307	303.5	306.5	319.25	310.75
0	279	0	0	0	295.8	302.5	302	293.333	297.5	300	315	299.5	302	291.75	296.75	290	302.4	290.8	294.75	290	286.25	281.5	127.25	0	0	0	279	293	308.833	306.333	299.333	310.667	306.6	320.75	304.75	325.5	305.5	307.75	300	319.25	316.25	310.25	312.25	313.75	305.833	299	308	302	303.75
0	289	0	0	0	312	299.75	293.333	302.167	287.25	303	298.5	297.75	299.25	288.5	299.75	286	299	294.2	303	295	289.25	280.25	128.167	0	0	0	278.167	299.167	305.75	309.75	310.25	313.5	314.75	310	306.5	308.5	318.5	322.5	318.25	315.75	310	301.25	316.75	314	313.5	309	302.5	310	316.25
0	299.5	0	0	0	302	299.455	292.667	291.833	306	299.25	285.833	303.75	297	287.5	290.75	297.167	293.833	309.167	301.625	293.429	297.667	280.833	123.5	0	0	0	271.75	298	298.75	301.25	309.25	305.5	307	300.75	298.5	315.75	299	316.5	302.25	311.5	310.75	301	308.5	313.75	308.5	318	301.4	318.25	314.5
0	296.333	0	0	0	0	299.824	298.9	292.833	295.222	296.5	294.833	297.889	312.167	300	290.167	289.5	294.5	277.75	299.5	301.333	294	285.25	133.75	0	0	0	285.5	306	320.5	314.5	314.25	314.25	314.25	321.25	328.25	307	308.5	316	325.5	315	320	313.25	302	321.75	316.5	313.75	326.5	324.5	323
0	302.5	0	0	0	0	305.7	302.429	306	302.833	312.75	319	300.667	297.25	303.75	295.5	298.5	302	299	303	304.25	292.667	287.5	130	0	0	0	280.75	297.5	314.5	325	310.25	308.5	312.5	317	316.25	314.5	307.75	324.5	314.5	313.5	307.5	312.5	321.75	314.5	333.25	333.5	329.4	315.8	315.5
0	304.5	0	0	0	0	307.4	314.167	308.333	305.4	307	328.25	296.25	302.5	309.25	297.25	306	304.25	297	290.5	310.25	288	289.2	125.75	0	0	0	284.25	308.25	308	308.5	310.25	312.5	316.5	317	317.75	307	310.75	325	327.25	327.75	315.5	329.25	316	324	321	321.5	317.75	320.333	325.25
0	294.5	0	0	0	0	305	306.625	304.167	310.75	303.333	299.5	303.25	302.167	316.25	302.5	304	307.75	318.25	309.5	303.25	310.5	296.6	164	0	0	0	284.5	306.25	311	312	316	317.25	316.5	311	315.25	319.5	321.5	323.75	318.5	327.25	315.75	332.75	319.75	318.25	329.75	320.25	319.5	318.25	325
0	289.5	0	0	0	0	315.875	294.75	310.167	310	307	315.25	309.25	317	293.5	303.75	311.25	313.25	306	307	298.5	299.75	291.5	179.167	0	0	0	283.5	308.25	317.5	323	326.25	323.75	321.25	316.25	324.25	305.75	325.5	323	352.75	324.25	321	317.75	323.25	328.25	330	319.25	318	334	324
0	303.5	0	0	0	0	315.667	310.25	306.5	313.167	304.6	304.8	305.5	315.75	309	310.25	322	306	297.75	312	310.5	298.5	291.5	274.25	0	0	0	283.25	318.5	315.5	316.5	325.5	343	315	323.25	346.5	345.25	339.75	400.75	375	320.75	327.75	323.25	324.25	311	316.25	329.75	331.25	345.75	360
0	311.5	0	0	0	0	311.2	313.556	314.667	315.667	307.25	316	306.5	312.75	301.5	310.667	305.75	309	308.5	314	298	306.75	313.25	275.25	0	0	0	287	313.25	318.25	331.5	332.75	347	323.75	320.75	319.75	350.25	327.25	331.5	327.25	317	317.25	319.75	330.75	319.75	338.75	351.25	375	388.5	443.25
0	305.5	0	0	0	0	326.667	317.818	314	318.833	318.25	317	311.25	317.25	307.75	324.4	315.2	319.75	324.75	313	300	308.5	305.25	285.25	0	0	0	300.25	327	316.25	343.25	382	326.5	315.75	330	337.25	325.5	329	332	326.25	328.75	334.75	320.75	341.5	342.75	370	416	447.5	416.25	383.75
0	352	0	0	0	0	0	336	330.375	330.8	334	328	328.833	322.75	355	320.5	319	332.5	347.5	420.25	342.5	322.75	339	326	0	0	0	365.5	430	319.75	313.75	338.75	331	324.75	336.75	312.75	331.25	335.75	339	328.25	327.25	350.25	356.5	381.25	435.75	436.5	428.5	390.5	347.75	330.5
0	465.5	0	0	0	0	0	444.75	412	387.833	396.167	388.25	404.833	539.5	357.5	343	326.6	332.4	463.75	593.25	368.75	337.25	390.5	387.25	0	0	0	269.833	431.75	333.25	327.25	325.75	330	321.5	339	332.75	331	328.5	346.75	360	373.75	404.25	396.5	460.5	474	413.5	364.25	342	336	329.5
0	430.5	0	0	0	0	0	526.455	474.857	382.167	509.667	498.25	474.2	707.6	368.75	477.5	372.5	405.833	475	432.25	337.75	328.75	348.5	291.25	0	0	0	148.75	320	319.75	317	320.5	334	330.75	331	329.25	348.75	372	388.75	439	437.25	434	452.75	408.75	397.5	350.5	332	331.75	332	341
0	389	0	0	0	0	0	596.1	567.25	493.833	837.2	452.4	375	418.833	427.25	523.25	427.5	494	344.333	327.75	315	303.5	318	288.75	0	0	0	146.75	314.75	317.167	341.75	325.75	354.25	335.75	368.75	385.25	422.5	471.5	482	521.75	479.75	432	394.25	341	346	343.5	331	327.75	334.25	329.25
0	406.5	0	0	0	0	0	576.111	899.5	523.714	1065.5	481.667	315.5	350.6	379.8	364.25	422.75	405.25	326	314.6	325.25	315.75	318.5	290.5	0	0	0	149	321.5	332	337.6	367.25	391	443.5	469.5	462.25	589.75	556	508	406.5	392.5	349.25	341.75	328.25	323	336.75	340.5	351.25	330	335
0	369	0	0	0	0	0	395.375	465.25	366	383.833	344.333	326.25	324	334.667	335.75	327.75	329	340.75	323.5	333	323.75	325.5	298.75	0	0	0	155.5	352.5	397	444.2	505.2	544.75	560.25	571.25	452.75	489.5	417.5	351.5	340.75	351.5	355.75	329	339.5	338.75	325.75	339.25	339.5	335.2	338
0	345.5	0	0	0	0	0	364.5	353	337	344.167	346	352.333	337.75	334.8	342.6	345.25	344.5	344.25	345.6	343	346.25	354.5	369.25	0	0	0	203.75	498.75	548.75	605	551.167	489.75	439	393	366.5	344.75	335.5	337.5	341.75	332.5	336.5	341.5	320.25	344.75	332.333	337.167	330.833	333	343.25
0	375.5	0	0	0	0	0	371.75	377.818	364.714	355	373.25	361.333	367.75	392.75	377.167	396.5	393	403	440.25	492.833	517.75	541.5	544.75	0	0	0	267.25	530.75	512.25	492.75	441.5	376	335.25	339.5	325	341	341.75	348.25	338	328.2	332.667	344.5	341.667	337	334.75	343.75	347.75	348.75	331.5
0	575	0	0	0	0	0	451	568.538	514.571	555.6	516.167	527.6	577.6	669	605.4	661.6	674.75	742.75	734.5	886.5	770.667	687.25	571.5	0	0	0	205.5	402.75	364.5	369.5	335.5	334.25	342	334.5	331	345	335.5	340.5	334.833	343.6	346	341.5	334.25	342.25	354.5	345.75	349.75	351.5	348.25
0	1816	0	0	0	0	0	0	1759.23	1463.14	1379.33	1220.33	1149.5	1158.67	1162.75	1092.25	946	960	861.5	810.75	743.75	595.2	451.4	357.25	0	0	0	157.75	320	332	334.75	341.8	338	327.714	341.75	333	329.5	344.5	336.75	337	336	352.25	344.75	346.25	338.75	360.5	341.25	360	333.75	362.75
0	2599	0	0	0	0	0	0	2528.25	1841.38	1790.17	1378.17	1190	1021.17	933.5	796.25	714.8	586.4	488	441.5	397.75	346.75	335.167	300	0	0	0	147.833	311.333	338.5	334.833	335.6	347	338.75	339.5	346.333	351.5	354	339.5	358.75	343.75	351.5	349.75	348.25	344.25	344	361	358.25	364.25	374.5
0	1128	0	0	0	0	0	0	1107.55	846.5	676.571	613.25	544.333	467	435.5	396	386.4	363.444	354.667	345.667	337.667	339	340.833	305.5	38.4286	0	0	151.25	315.5	340.75	340.75	337	335.75	334.25	342.5	343.75	342.5	333.75	335	356	346	352.5	355	352.5	365.5	355.25	361	345.5	374.5	507
0	409	0	0	0	0	0	0	405.429	390	380.889	373	353.667	352.333	343.111	351.167	346.8	343.75	335.833	338.25	337.75	342	331.75	322.5	95.8333	0	0	147.75	328.75	344.25	344.5	352	345.75	345	349.75	339.5	342.6	344	341.75	356.5	354	349.25	348.25	367.5	370.25	377	436.5	420.25	491.25	821.75
0	374	0	0	0	0	0	0	352.857	355.2	346.714	347.667	345	338.4	346	341.167	340.75	341.75	347.5	329.75	337.25	323.75	324.75	321	143.25	0	0	154.25	326.75	348.25	338.5	332.75	346.25	356	348.25	349.25	360.75	341.2	362.8	353.25	357.25	356	372	381.5	388	443.25	5493	992.5	1377.5	2115.5
0	348	0	0	0	0	0	0	354.8	347.818	351.571	333.667	343.2	346.167	344	338.5	339.25	338.25	346.25	345.5	333.75	332.5	332	318	144.25	0	0	154.25	323.75	343.5	346	351.5	352.5	353	353	344.75	342.5	359	358	372.2	392.75	385.5	441.5	485.75	695.5	1008.5	2450	2572.75	2321	3365
0	343.5	0	0	0	0	0	0	336	344.643	337.143	340.167	348.833	347.333	343	345.5	351.833	339.25	335	336.2	332.6	341.75	328	315.75	146.75	0	0	155.25	335.75	353	339.25	359	356.5	368	356.25	360.25	384.25	367.75	382.25	412.333	461.5	580.25	1153	1162.25	2053.5	2268.75	2702.25	3280.5	3156.5	1824.25
0	350	0	0	0	0	0	0	0	351.643	355.5	355.167	349	339.5	350.667	338.25	341.833	340.75	344	340.75	345.167	338.75	328.75	326.75	145.5	0	0	101.333	339.75	358.25	353.25	364.5	367	380.75	380.25	387.75	396.5	459.5	487	747.5	1106.83	1636.75	2689.5	2971.75	5259	3007.75	2237.75	1909.25	759	479.75
0	347	0	0	0	0	0	0	0	350.769	349	356	348.4	347.6	360	354.75	362	362.333	355.75	356	362.75	349.333	340	330.25	154.25	0	0	0	324.667	357.5	376.5	398.5	482.25	480.5	515.75	680	747	1355.25	1346.5	2432.25	2407.75	2700.5	3291.5	2730.25	1892	1250.25	626	435	402	388
0	345.5	0	0	0	0	0	0	0	365.818	360.556	361.667	361.667	360.833	357.6	360.6	363.5	349.333	358.5	366	362.25	353	365.25	346.25	152.75	0	0	0	353.8	431	434.75	723.75	1448.25	2035.5	1825.75	1488.75	1998.25	2884.5	3114.25	3255.25	3811.25	2454.6	1626.2	710.5	473.5	410.75	375.5	369.25	375.5	369.25
0	380.5	0	0	0	0	0	0	0	374.3	375.778	377.857	364.833	385.667	370.5	373.667	374.25	383.5	364.667	374	375.5	384	372.667	370	176.5	0	0	0	467	882.8	1489	1832	2146.75	2477.25	2781	2980.5	2586.5	3134.75	2365.25	1479	1217.25	639.25	458.6	398.4	399.5	387.25	387	387	373.75	366
0	427	0	0	0	0	0	0	0	412.875	404.6	397.375	403.333	391.8	404.2	398.2	406.6	418	416.5	446	513.25	481	501.8	737.6	512	0	0	0	1364.75	2046.5	2571.17	2882.75	3625.75	3160.75	3018	2531.5	1356.75	898.5	673.5	474.75	436.75	407.5	401.5	384.6	381.2	361.75	367.5	384.25	368.75	372.5
0	580.5	0	0	0	0	0	0	0	561.6	542.083	492.714	472.833	574	599	583.5	641.167	766.25	819.25	1193	2254	1593.25	1584	2198	1395	0	0	0	3352.75	2606	2834.25	3041.17	1858.5	1654.25	947.75	602.75	503.25	404	394.5	389.25	386.75	377.5	369.75	370.5	367.5	371.667	362.333	367.5	374.5	356.75
0	2185.5	0	0	0	0	0	0	0	3764	3461.67	1731.62	1481.17	2032	2179.67	2491	2456	2861.75	2786.25	3032.33	3051.25	3236	3196.5	3197.75	2102.83	0	0	0	3275	1921.5	1270.5	859.4	488.4	440.5	407.5	389.25	391.5	396.25	362	357.75	376.25	366	374	364.5	360.5	372.333	370	363.5	358.5	363.75
0	5858	0	0	0	0	0	0	0	0	5906.6	4716.62	4993.86	4659.67	4577.5	4914.83	4344	4947.17	4517.75	3544	3610.67	3320.75	2959.25	2010	1162.6	0	0	0	528	439.25	405	386.75	378	370.4	371	369	355.5	353.667	359.333	343.5	363.333	360.25	357	348.25	349.5	352.75	357.667	351	357.75	365.75
0	8642	0	0	0	0	0	0	0	0	6779.43	6000.12	6263.33	5347.5	4632	3705	3280.25	2444.33	1814.5	1365	1235.2	738.2	602.25	471.5	396.75	0	0	0	354.5	371	382	367.167	374.167	366	362	382.6	379.75	373.75	383.75	377	367.75	372.75	384.5	385.75	388.5	387.25	382.75	378.333	399.75	399.75
0	2881.5	0	0	0	0	0	0	0	0	3352.67	2874	1833	1662.83	1118.33	861.2	666.6	553	522.333	458.75	441.5	409.333	384.667	378.667	334.667	0	0	0	349.667	363	395	390.25	376.75	366.5	379	391.4	371.5	369.75	391	388	391.25	390.75	373.5	368.75	389.25	374.25	384.25	389.5	393.167	380
0	479.333	0	0	0	0	0	0	0	0	510.786	486.438	478.455	448.9	439	414	412.222	406.667	393.5	388	380.5	376.571	374.167	361.25	332.75	0	0	0	339.5	381.75	380.5	386.25	407.75	394.25	395.75	367.8	380	363.25	385.25	366.5	385	381.25	361.5	389	393.25	382	399.75	403	368.8	392
0	411.5	0	0	0	0	0	0	0	0	401.857	401.636	380.125	396.5	382.833	397.5	386	390.333	384.5	383	361	374.5	364	367.4	343.75	0	0	0	226.667	366.25	385.75	377	380	369.5	369	383.75	389.667	367.75	371	387.75	389.25	389.25	387.75	381.75	387.5	387.25	384	393.25	380.75	390
0	401	0	0	0	0	0	0	0	0	381.5	394.333	394.111	374	383.333	380.667	392	391.667	367.75	373.2	371.2	370	368	369.333	327.75	0	0	0	207.4	374.6	373.25	414.5	382.25	397	395.75	385	383	377	380.5	384.75	386.5	401	376	389	382.25	388.5	378.75	377.25	404	396.5
0	349	0	0	0	0	0	0	0	0	0	387	378.5	392	383.333	366.8	391.5	381.6	379	369.75	369.833	390.75	374.5	370.2	346.2	0	0	0	163.75	368.833	381.75	382.75	393.5	390.75	388.5	388.75	400.5	386.25	395.5	396.5	369	402.5	385.75	399.75	402.5	391.25	374.25	389.75	391.75	405.5
0	393	0	0	0	0	0	0	0	0	0	381.714	379.4	378.833	382.167	381.667	392	383.25	363.167	372.75	369.8	371.8	361.5	368	350.667	0	0	0	161	358.5	369.833	390.75	387.5	369.25	393	393	384.75	386	401.6	386.8	388.25	385.25	396	390	383.25	384.25	395	371.75	416.5	405.5
0	359.5	0	0	0	0	0	0	0	0	0	378.154	388.778	373.25	371.833	388.333	374.2	366.2	394.4	390.4	375	374.667	366.25	365	357	112.167	0	0	172.5	359.25	386.6	378.2	381	378.25	388	395.25	389.25	394.5	373.5	399.6	390.2	405.75	389	382.75	404	388.5	402	388.75	385.75	400
0	387.5	0	0	0	0	0	0	0	0	0	373.727	368.6	378	387.714	387.833	381	364.167	357	379.5	371.5	387.25	372.5	370.5	361.75	125	0	0	168.25	386.5	380.75	373.2	388	397.5	379	387.75	383	383.75	396.25	389	392.5	394.5	390.25	395	383	394.25	421.5	398	390.5	393.75
0	368.5	0	0	0	0	0	0	0	0	0	378.5	385.25	376.75	380.333	373.667	370	375.6	371	381.2	375.6	370.25	383	373.25	349.5	167.25	0	0	181	362.5	374.25	374.25	394.5	396	372.75	383.25	389	386.5	392	401.75	399.75	394.333	394	394.25	389.25	390.6	413.167	405.167	399.667	393.333
0	378	0	0	0	0	0	0	0	0	0	374	386.857	383.444	382.714	380	388.667	374	384	381.5	388	390	385.75	378.167	355.75	168.25	0	0	181.5	365.5	390.75	404.75	403.75	401	389.5	398.75	405	390.75	402.75	394.5	398.25	402.667	400.125	409.571	395.5	410.2	411	420.25	414	418.25
0	379	0	0	0	0	0	0	0	0	0	0	387.294	384.222	388.167	390.571	385	383	384.333	388.5	385.6	386.2	376.75	382.4	373.6	169	0	0	143.4	372.5	395.75	404.25	398	414	398	401.333	411.5	402.333	415.167	395.833	406	415.25	406	407.167	400.25	407	415.25	408.75	414.75	427
0	394	0	0	0	0	0	0	0	0	0	0	390.75	386	392.571	386.5	380.667	393.833	378.25	384.833	392.5	383.333	388.75	391.25	371.833	173	0	0	104.143	373.571	387	412.333	398.167	404	400.714	409	410.5	406.75	408.75	394	407.75	415.25	412.5	423.75	415	411.75	406	419.75	402.5	426.75
0	373	0	0	0	0	0	0	0	0	0	0	389.143	390.3	386.429	398.429	375.167	389.8	374.4	384.857	384.571	385.571	386.875	389.333	373.571	221.5	0	0	0	368.167	386.25	407.25	396	394.5	390.75	397.8	397.6	392.25	392	409.75	405.25	404.25	415	400	401	414.667	405.5	411.5	421.5	416.5
0	377.667	0	0	0	0	0	0	0	0	0	0	391.062	379.529	386.417	382	393.222	385.444	388.222	386.4	388.667	387.5	398.833	396.75	379.75	288	0	0	0	373.75	388.833	389.5	390.5	390.25	403.5	411.75	400.8	416.6	426	397.5	405.75	415.5	397.75	406.75	416.75	408.4	414.8	415.25	407.5	408.25
0	400	0	0	0	0	0	0	0	0	0	0	417	403.462	417.5	409.25	408.833	418.333	408	390.833	404.4	388.6	392.75	408.833	402.25	383.25	0	0	0	390.5	404.25	416	412.25	419.25	413	421.75	428.75	431.667	429	425	422.75	438.75	421.25	412.25	452	428.75	426	430	426.75	426.75
[truncated: 82 more columns]

[truncated: 42 more sheets: Fig 2b, Fig 2e, Fig 2h, Fig 2c, Fig 2f, Fig 2i, Fig2a-2i x-y axes, Fig 2j - 2l, Fig 3a, Fig 3c, Fig 3e, Fig 3g, Fig 3b, Fig 3d, Fig 3f, Fig 3h, Fig 3a-3h x-y axes, Fig 3i, Fig 3j, Fig 4a_Pb …]
